# Supplementary material for: Radioactive Labeling of Milk-Derived Exosomes with 99mTc and In Vivo Tracking by SPECT Imaging
Source: MDPI journal article supplement (doi:10.3390/nano10061062), 2020-05-30
Supplement: s1 [file s1]

For ensuring and maintaining the transparency and reproducibility of the results recorded, authors have provided the following research data, openly available as supplementary information:

Table S1. Experimental data from Figure 1B. Radioefficiency of exosomes labeled with  $^{99m}\text{Tc}$  (VII) vs.  $^{99m}\text{Tc}$  (IV):

| $^{99m}\text{Tc}$ (VII) (% Radioefficiency) | $^{99m}\text{Tc}$ (IV) (% Radioefficiency) |
|---------------------------------------------|--------------------------------------------|
| 0.380572                                    | 99.53368                                   |

Table S2. Experimental data from Figure 1C. Effect of the exosome protein concentration in the radiochemical yield:

| 10 $\mu\text{g}$ (% radiochemical yield) | 30 $\mu\text{g}$ (% radiochemical yield) | 75 $\mu\text{g}$ (% radiochemical yield) |
|------------------------------------------|------------------------------------------|------------------------------------------|
| 0.042337                                 | 25.8549                                  | 35.8119                                  |
| 0.0965251                                | 20.0012                                  | 27.73979                                 |
| 0.0681485                                | 22.69181                                 | 46.4049                                  |

Table S3. Experimental data from Figure 1D. Determination of optimum concentration of  $\text{SnCl}_2$  as a reducing agent:

| $[\text{SnCl}_2] = 0.0004 \text{ M}$ (% radiochemical yield) | $[\text{SnCl}_2] = 0.002 \text{ M}$ (% radiochemical yield) |
|--------------------------------------------------------------|-------------------------------------------------------------|
| 8.947528                                                     | 25.8549                                                     |
| $[\text{SnCl}_2] = 0.004 \text{ M}$ (% radiochemical yield)  | $[\text{SnCl}_2] = 0.006 \text{ M}$ (% radiochemical yield) |
| 22.69181                                                     | 0.4212573                                                   |
| $[\text{SnCl}_2] = 0.008 \text{ M}$ (% radiochemical yield)  | $[\text{SnCl}_2] = 0.01 \text{ M}$ (% radiochemical yield)  |
| 0.4316547                                                    | 0.09624639                                                  |

Table S4. Experimental data from Figure 2D. Longitudinal in vitro stability study of [<sup>99m</sup>Tc]-Exo:

| Time (h) | Measure 1 (% stability) | Measure 2 (% stability) | Measure 3 (% stability) |
|----------|-------------------------|-------------------------|-------------------------|
| 0        | 99.99348                | 99.98031                | 99.98821                |
| 1        | 99.9828                 | 99.99847                | 99.98371                |
| 2        | 99.98698                | 99.98277                | 99.97607                |
| 3        | 99.98872                | 99.99452                | 99.99451                |
| 4        | 99.98582                | 99.98961                | 99.9865                 |
| 5        | 99.9835                 | 99.98859                | 99.98277                |
| 12       | 99.98089                | 99.98689                | 99.98226                |
| 21       | 99.31057                | 99.81034                | 99.22935                |
| 24       | 98.88326                | 99.85741                | 99.11706                |
| 44       | 99.17173                | 99.87185                | 98.51602                |
| 48       | 98.5209                 | 99.46484                | 97.79107                |

Table S5. Experimental data from Figure 3C. Ex vivo biodistribution study 24 h after injection:

| Organs     | Mouse 1 (%ID/g) | Mouse 2 (%ID/g) | Mouse 3 (%ID/g) |
|------------|-----------------|-----------------|-----------------|
| Brain      | 0.02507709      | 0.02317714      | 0.03338972      |
| Tyroid     | 1.032505        | 1.57446         | 1.186318        |
| Lungs      | 0.2957729       | 0.4062359       | 0.1747051       |
| Heart      | 0.1318073       | 0.1398794       | 0.07554109      |
| Stomach    | 2.242374        | 1.415491        | 3.285615        |
| Liver      | 31.87944        | 32.67875        | 45.3077         |
| Spleen     | 18.12445        | 40.43972        | 34.7402         |
| Kidneys    | 1.6454          | 1.533811        | 0.990088        |
| Intestines | 0.2536879       | 0.0361366       | 0.08906547      |
| Feces      | 4.602346        | 0.4823191       | 0.4324131       |
| Muscle     | 0.06785137      | 0.06988291      | 0.04076531      |
| Skin       | 0.1717769       | 0.206202        | 0.180345        |
| Blood      | 0.2443977       | 0.1803119       | 0.2041214       |

Table S6. Experimental data from Figure 3D. In vivo blood half-life:

| Time (min) | %ID/g (normalized) |
|------------|--------------------|
| 5          | 100                |
| 15         | 24.9982            |
| 30         | 20.16352           |
| 45         | 14.12024           |
| 60         | 12.81787           |
| 75         | 14.15323           |
| 90         | 9.541121           |
| 105        | 15.31007           |
| 120        | 9.729397           |
| 150        | 13.30491           |
| 180        | 6.308547           |
| 210        | 7.293179           |
| 240        | 7.951927           |
| 270        | 5.657072           |
| 300        | 10.70875           |
| 360        | 12.5868            |
| 1355       | 9.090429           |
| 1450       | 6.554768           |

Table S7. Experimental data from Figure 4C. Ex vivo biodistribution study 24 h after injection:

| Organs     | Mouse 1 (%ID/g) | Mouse 2 (%ID/g) | Mouse 3 (%ID/g) |
|------------|-----------------|-----------------|-----------------|
| Brain      | 0.08444156      | 0.05708802      | 0.0175102       |
| Tyroid     | 14.4406         | 22.85811        | 28.8508         |
| Lungs      | 7.037856        | 0.9599242       | 0.3848855       |
| Heart      | 0.3154105       | 0.2748781       | 0.1789648       |
| Stomach    | 16.44037        | 28.20265        | 9.849386        |
| Liver      | 11.56481        | 15.89863        | 5.893948        |
| Spleen     | 11.40166        | 9.057914        | 5.376181        |
| Kidneys    | 7.592789        | 5.635682        | 5.653645        |
| Intestines | 1.038048        | 1.241049        | 1.518446        |
| Feces      | 1.453404        | 1.214827        | 0.6756303       |
| Muscle     | 0.1481501       | 0.1315616       | 0.1982758       |
| Skin       | 0.9428526       | 0.1988679       | 0.4412295       |
| Blood      | 3.007046        | 0.2301117       | 0.1922312       |
| Bone       | 0.501948        | 0.4495765       | 0.249477        |

Table S8. Experimental data from Figure 4D. In vivo blood half-life:

| Time (min) | %ID/g (normalized) |
|------------|--------------------|
| 15         | 100                |
| 30         | 36.17852           |
| 45         | 35.49108           |
| 60         | 29.80623           |
| 120        | 33.84724           |
| 150        | 28.0876            |
| 270        | 24.29885           |
| 1440       | 0.3685673          |

Table S9. Experimental data from Figure 5C. Ex vivo biodistribution study 24 h after injection:

| Organs     | Mouse 1 (%ID/g) | Mouse 2 (%ID/g) | Mouse 3 (%ID/g) |
|------------|-----------------|-----------------|-----------------|
| Brain      | 0.002349962     | 0.005423833     | 0.006460233     |
| Tyroid     | 0.056358        | 0.04513213      | 0.06977542      |
| Lungs      | 0.03088487      | 0.007491822     | 0.0067587       |
| Heart      | 0.01093877      | 0.0253785       | 0.06421413      |
| Stomach    | 0.4226386       | 0.2638863       | 0.07102636      |
| Liver      | 0.0563076       | 0.01067482      | 0.009019142     |
| Spleen     | 0.01566947      | 0.006133917     | 0.004281671     |
| Kidneys    | 0.0204488       | 0.04698562      | 0.05342975      |
| Intestines | 0.03634911      | 0.02953024      | 0.01783494      |
| Feces      | 0.7556344       | 0.1409586       | 0.03605567      |
| Muscle     | 0.005287857     | 0.006198084     | 0.002054        |
| Skin       | 0.0082722       | 0.006784981     | 0.007175661     |
| Blood      | 0.02904076      | 0.005553125     | 0.004469065     |
| Head       | 0.4154179       | 0.1999761       | 0.3107402       |

Table S10. Experimental data from Figure 5D. In vivo blood half-life:

| Time (min) | %ID/g (normalized) |
|------------|--------------------|
| 1          | 100                |
| 9          | 9.926032           |
| 21         | 8.092739           |
| 29         | 3.884516           |
| 93         | 7.649045           |
| 107        | 4.166147           |
| 121        | 4.899386           |
| 130        | 3.499564           |
| 147        | 4.899386           |
