# Supplementary material for: Radioactive Labeling of Milk-Derived Exosomes with 99mTc and In Vivo Tracking by SPECT Imaging
Source: MDPI journal article supplement (doi:10.3390/nano10061062), 2020-05-30
Supplement: s1 [file s1]

Table S12. Experimental data from FIG 2C. Radioactive HPLC chromatogram:

| <b>Time (min)</b> | <b>[99mTc]-Exo<br/>(Intensity,<br/>normalized)</b> | <b>free 99mTc<br/>(Intensity,<br/>normalized)</b> | <b>Non-labeled exosomes<br/>(Intensity, normalized)</b> |
|-------------------|----------------------------------------------------|---------------------------------------------------|---------------------------------------------------------|
| 0                 | 0.06565659                                         | 0.2431713                                         | -0.1385713                                              |
| 0.01666667        | 0.05371903                                         | 0.139599                                          | -0.1524285                                              |
| 0.03333333        | 0.07759415                                         | 0.1125734                                         | -0.04849996                                             |
| 0.05              | 0.06565659                                         | 0.166611                                          | 0                                                       |
| 0.06666667        | 0.03581268                                         | 0.09906964                                        | 0.02771427                                              |
| 0.08333334        | 0.05371903                                         | 0.1531027                                         | 0.07621423                                              |
| 0.1               | 0.08953171                                         | 0.1215834                                         | 0.1039285                                               |
| 0.1166667         | 0.03581268                                         | 0.1170762                                         | 0.09007137                                              |
| 0.1333333         | 0.04178147                                         | 0.1936275                                         | 0.07621423                                              |
| 0.15              | 0.06565659                                         | 0.1170807                                         | 0.07621423                                              |
| 0.1666667         | 0.05371903                                         | 0.1486                                            | 0.07621423                                              |
| 0.1833333         | 0.0298439                                          | 0.09906514                                        | 0.0623571                                               |
| 0.2               | 0.0298439                                          | 0.09005962                                        | 0.04849996                                              |
| 0.2166667         | 0.07162537                                         | 0.09906514                                        | 0.0623571                                               |
| 0.2333333         | 0.03581268                                         | 0.1440972                                         | 0.0623571                                               |
| 0.25              | 0.04775025                                         | 0.1080706                                         | 0.05542853                                              |
| 0.2666667         | 0.02387512                                         | 0.1260817                                         | 0.05542853                                              |
| 0.2833333         | 0.06565659                                         | 0.166611                                          | 0.0415714                                               |
| 0.3               | 0.04775025                                         | 0.1936365                                         | 0.0415714                                               |
| 0.3166667         | 0.0298439                                          | 0.1350917                                         | 0.05542853                                              |
| 0.3333333         | 0.01790634                                         | 0.1305889                                         | 0.0415714                                               |
| 0.35              | 0.04178147                                         | 0.1305889                                         | 0.0415714                                               |
| 0.3666667         | 0.02387512                                         | 0.1395945                                         | 0.0623571                                               |
| 0.3833333         | 0.04775025                                         | 0.175621                                          | 0.0623571                                               |
| 0.4               | 0.08356293                                         | 0.09456238                                        | 0.0415714                                               |
| 0.4166667         | 0.03581268                                         | 0.166611                                          | 0.02771427                                              |
| 0.4333333         | 0.08953171                                         | 0.1576055                                         | 0.0415714                                               |
| 0.45              | 0.04178147                                         | 0.1395945                                         | 0.03464283                                              |
| 0.4666667         | 0.04775025                                         | 0.1125779                                         | 0.0207857                                               |
| 0.4833333         | 0.0298439                                          | 0.1035679                                         | 0.006928566                                             |
| 0.5               | 0.0298439                                          | 0.166611                                          | -0.01385713                                             |
| 0.5166667         | 0.04775025                                         | 0.1666155                                         | -0.0415714                                              |
| 0.5333334         | 0.0298439                                          | 0.1350917                                         | -0.05542853                                             |
| 0.55              | 0.03581268                                         | 0.1125779                                         | -0.05542853                                             |
| 0.5666667         | 0.04178147                                         | 0.1350917                                         | -0.05542853                                             |
| 0.5833333         | 0.03581268                                         | 0.1711182                                         | -0.05542853                                             |
| 0.6               | 0.0298439                                          | 0.1350917                                         | -0.0623571                                              |
| 0.6166667         | 0.08356293                                         | 0.1080751                                         | -0.06928567                                             |
| 0.6333333         | 0.0298439                                          | 0.1486                                            | -0.0623571                                              |
| 0.65              | 0.005968781                                        | 0.1711182                                         | -0.04849996                                             |
| 0.6666667         | 0.03581268                                         | 0.08555687                                        | -0.05542853                                             |

|           |             |            |             |
|-----------|-------------|------------|-------------|
| 0.6833333 | 0.04775025  | 0.1125734  | -0.06928567 |
| 0.7       | 0.04775025  | 0.1215834  | -0.07621423 |
| 0.7166666 | 0.05371903  | 0.1486     | -0.0623571  |
| 0.7333333 | 0.06565659  | 0.1170807  | -0.07621423 |
| 0.75      | 0.04775025  | 0.1486     | -0.1039285  |
| 0.7666667 | 0.04775025  | 0.1440972  | -0.09699993 |
| 0.7833334 | 0.04178147  | 0.1260862  | -0.07621423 |
| 0.8       | 0.04178147  | 0.1215834  | -0.07621423 |
| 0.8166667 | 0.06565659  | 0.1260862  | -0.09699993 |
| 0.8333333 | 0.03581268  | 0.1080706  | -0.1108571  |
| 0.85      | 0.04775025  | 0.1350872  | -0.09007137 |
| 0.8666667 | 0.01193756  | 0.1395945  | -0.08314279 |
| 0.8833333 | 0.04775025  | 0.1395945  | -0.1177856  |
| 0.9       | 0.05968781  | 0.1260817  | -0.1385713  |
| 0.9166667 | 0.05371903  | 0.1801238  | -0.1454999  |
| 0.9333333 | 0.01790634  | 0.1395945  | -0.1454999  |
| 0.95      | 0.03581268  | 0.1305889  | -0.1524285  |
| 0.9666666 | 0.04178147  | 0.1170807  | -0.1662856  |
| 0.9833333 | 0.04178147  | 0.1125734  | -0.1732142  |
| 1         | 0.0298439   | 0.1170807  | -0.159357   |
| 1.016667  | 0.0298439   | 0.1125734  | -0.1524285  |
| 1.033333  | 0.01790634  | 0.1170762  | -0.1524285  |
| 1.05      | 0.04178147  | 0.1350917  | -0.1524285  |
| 1.066667  | 0.0298439   | 0.1170807  | -0.159357   |
| 1.083333  | 0.0298439   | 0.1305889  | -0.1801427  |
| 1.1       | 0.04178147  | 0.1260817  | -0.1870713  |
| 1.116667  | 0.01193756  | 0.1170807  | -0.2009284  |
| 1.133333  | 0.0298439   | 0.1170762  | -0.2147856  |
| 1.15      | 0.05968781  | 0.1711137  | -0.2286427  |
| 1.166667  | 0.05371903  | 0.1711182  | -0.2355713  |
| 1.183333  | 0.04178147  | 0.15761    | -0.2286427  |
| 1.2       | 0.05968781  | 0.09906514 | -0.2147856  |
| 1.216667  | 0.0298439   | 0.157601   | -0.2286427  |
| 1.233333  | 0.02387512  | 0.1441017  | -0.2424998  |
| 1.25      | 0.05371903  | 0.1260862  | -0.2286427  |
| 1.266667  | 0.01790634  | 0.1215834  | -0.2147856  |
| 1.283333  | 0.04775025  | 0.1576055  | -0.2286427  |
| 1.3       | 0.05371903  | 0.1531027  | -0.256357   |
| 1.316667  | 0.03581268  | 0.1215834  | -0.2494284  |
| 1.333333  | 0.04775025  | 0.1801238  | -0.2286427  |
| 1.35      | 0.0298439   | 0.1350917  | -0.2355713  |
| 1.366667  | 0.03581268  | 0.1531027  | -0.256357   |
| 1.383333  | 0.005968781 | 0.1441017  | -0.2771427  |
| 1.4       | 0.05371903  | 0.09906514 | -0.2840712  |
| 1.416667  | 0.04775025  | 0.1486     | -0.2632855  |
| 1.433333  | 0.04775025  | 0.1486     | -0.256357   |
| 1.45      | 0.04775025  | 0.1035679  | -0.2702141  |

|          |            |            |            |
|----------|------------|------------|------------|
| 1.466667 | 0.04775025 | 0.1260862  | -0.2771427 |
| 1.483333 | 0.05371903 | 0.1305844  | -0.2702141 |
| 1.5      | 0.03581268 | 0.1486     | -0.2771427 |
| 1.516667 | 0.04775025 | 0.1350917  | -0.2840712 |
| 1.533333 | 0.0298439  | 0.1350917  | -0.2702141 |
| 1.55     | 0.03581268 | 0.08555687 | -0.2771427 |
| 1.566667 | 0.05371903 | 0.1080706  | -0.3048569 |
| 1.583333 | 0.03581268 | 0.1395945  | -0.3394998 |
| 1.6      | 0.0298439  | 0.09906514 | -0.3533569 |
| 1.616667 | 0.06565659 | 0.166611   | -0.3602855 |
| 1.633333 | 0.03581268 | 0.1440972  | -0.3602855 |
| 1.65     | 0.04775025 | 0.1260862  | -0.3602855 |
| 1.666667 | 0.0298439  | 0.1531027  | -0.367214  |
| 1.683333 | 0.01790634 | 0.1440972  | -0.367214  |
| 1.7      | 0.01790634 | 0.1215834  | -0.3602855 |
| 1.716667 | 0.01193756 | 0.166611   | -0.3602855 |
| 1.733333 | 0.01790634 | 0.1350917  | -0.3879997 |
| 1.75     | 0.01790634 | 0.1576055  | -0.4018569 |
| 1.766667 | 0.05968781 | 0.1576055  | -0.4018569 |
| 1.783333 | 0.04178147 | 0.1350917  | -0.415714  |
| 1.8      | 0.05968781 | 0.1395945  | -0.4364997 |
| 1.816667 | 0.03581268 | 0.166611   | -0.4434282 |
| 1.833333 | 0.05968781 | 0.1531072  | -0.4364997 |
| 1.85     | 0.04178147 | 0.09456238 | -0.4364997 |
| 1.866667 | 0.01790634 | 0.1440972  | -0.4364997 |
| 1.883333 | 0.01790634 | 0.1621082  | -0.4364997 |
| 1.9      | 0.03581268 | 0.1125779  | -0.4434282 |
| 1.916667 | 0.04775025 | 0.1215834  | -0.4503568 |
| 1.933333 | 0.04775025 | 0.1260817  | -0.4434282 |
| 1.95     | 0.0298439  | 0.1215834  | -0.4503568 |
| 1.966667 | 0.05371903 | 0.1035724  | -0.4503568 |
| 1.983333 | 0.04178147 | 0.1035679  | -0.4503568 |
| 2        | 0.04775025 | 0.1486     | -0.4572854 |
| 2.016667 | 0.03581268 | 0.1350917  | -0.464214  |
| 2.033333 | 0.01790634 | 0.1260817  | -0.4711425 |
| 2.05     | 0.05968781 | 0.1350917  | -0.4988568 |
| 2.066667 | 0.05371903 | 0.1486     | -0.4988568 |
| 2.083333 | 0.02387512 | 0.1621127  | -0.5127139 |
| 2.1      | 0.04775025 | 0.09005962 | -0.5404282 |
| 2.116667 | 0.04775025 | 0.1260862  | -0.5612139 |
| 2.133333 | 0.04775025 | 0.1125734  | -0.5889282 |
| 2.15     | 0.0298439  | 0.1035679  | -0.6097139 |
| 2.166667 | 0.0298439  | 0.1486     | -0.5958567 |
| 2.183333 | 0.03581268 | 0.1125779  | -0.575071  |
| 2.2      | 0.02387512 | 0.08555687 | -0.5889282 |
| 2.216667 | 0.02387512 | 0.1260817  | -0.5958567 |
| 2.233333 | 0.02387512 | 0.08105411 | -0.5889282 |

|          |             |            |            |
|----------|-------------|------------|------------|
| 2.25     | 0.0298439   | 0.1215789  | -0.6097139 |
| 2.266667 | 0.04775025  | 0.1531027  | -0.6304995 |
| 2.283333 | 0.01790634  | 0.1981393  | -0.6443567 |
| 2.3      | 0.01790634  | 0.09906514 | -0.6651424 |
| 2.316667 | 0.04775025  | 0.1125734  | -0.6859281 |
| 2.333333 | 0.04178147  | 0.1486     | -0.6859281 |
| 2.35     | 0.0298439   | 0.1350917  | -0.6928567 |
| 2.366667 | 0.06565659  | 0.1215834  | -0.6859281 |
| 2.383333 | 0.05968781  | 0.166611   | -0.6859281 |
| 2.4      | 0.06565659  | 0.1305889  | -0.6997852 |
| 2.416667 | 0.05968781  | 0.139599   | -0.6928567 |
| 2.433333 | 0.04775025  | 0.1080706  | -0.6928567 |
| 2.45     | 0.04775025  | 0.1260817  | -0.734428  |
| 2.466667 | 0.04775025  | 0.1440972  | -0.7690709 |
| 2.483333 | 0.03581268  | 0.193632   | -0.782928  |
| 2.5      | 0.0298439   | 0.1801283  | -0.7759994 |
| 2.516667 | 0.04775025  | 0.1260862  | -0.7690709 |
| 2.533333 | 0.04775025  | 0.1350917  | -0.7690709 |
| 2.55     | 0.04178147  | 0.08555687 | -0.7759994 |
| 2.566667 | 0.04178147  | 0.1756165  | -0.7967851 |
| 2.583333 | 0.02387512  | 0.1576055  | -0.8244994 |
| 2.6      | 0.04178147  | 0.1170807  | -0.8452851 |
| 2.616667 | 0.03581268  | 0.1440972  | -0.8452851 |
| 2.633333 | 0.0298439   | 0.1305889  | -0.8522137 |
| 2.65     | 0.0298439   | 0.1711182  | -0.8660708 |
| 2.666667 | 0.04775025  | 0.1801238  | -0.8591422 |
| 2.683333 | 0.0298439   | 0.1486     | -0.8591422 |
| 2.7      | 0.05371903  | 0.1441017  | -0.8799279 |
| 2.716667 | 0.0298439   | 0.1125734  | -0.9076422 |
| 2.733333 | 0.04178147  | 0.1260862  | -0.9284279 |
| 2.75     | 0.0298439   | 0.0720486  | -0.9422851 |
| 2.766667 | 0.04775025  | 0.157601   | -0.9630708 |
| 2.783333 | 0.03581268  | 0.1531072  | -0.9769279 |
| 2.8      | 0.02387512  | 0.193632   | -0.9838564 |
| 2.816667 | 0.03581268  | 0.1350917  | -0.990785  |
| 2.833333 | 0.01790634  | 0.1621127  | -1.011571  |
| 2.85     | 0.03581268  | 0.1305889  | -1.025428  |
| 2.866667 | 0.02387512  | 0.1531027  | -1.025428  |
| 2.883333 | 0.04178147  | 0.1260862  | -1.018499  |
| 2.9      | 0.01193756  | 0.1170762  | -1.004642  |
| 2.916667 | 0.005968781 | 0.1305889  | -1.018499  |
| 2.933333 | 0.0298439   | 0.1350917  | -1.039285  |
| 2.95     | 0.04775025  | 0.1486045  | -1.039285  |
| 2.966667 | 0.04178147  | 0.1260862  | -1.046214  |
| 2.983333 | 0.0298439   | 0.08555687 | -1.053142  |
| 3        | 0.04178147  | 0.1350872  | -1.066999  |
| 3.016667 | 0.05371903  | 0.1531072  | -1.073928  |

|          |             |            |           |
|----------|-------------|------------|-----------|
| 3.033333 | 0.03581268  | 0.1170762  | -1.087785 |
| 3.05     | 0.03581268  | 0.15761    | -1.129356 |
| 3.066667 | 0.02387512  | 0.1305889  | -1.157071 |
| 3.083333 | 0.04775025  | 0.09906514 | -1.170928 |
| 3.1      | 0.0298439   | 0.1215834  | -1.177856 |
| 3.116667 | 0.03581268  | 0.1576055  | -1.170928 |
| 3.133333 | 0.02387512  | 0.1080751  | -1.170928 |
| 3.15     | 0.03581268  | 0.1170762  | -1.184785 |
| 3.166667 | 0.0298439   | 0.1440972  | -1.198642 |
| 3.183333 | 0.03581268  | 0.1080751  | -1.212499 |
| 3.2      | 0.03581268  | 0.1035679  | -1.233285 |
| 3.216667 | 0.04178147  | 0.1440972  | -1.254071 |
| 3.233333 | 0.01790634  | 0.1305889  | -1.254071 |
| 3.25     | 0.04775025  | 0.1260817  | -1.254071 |
| 3.266667 | 0.02387512  | 0.1080706  | -1.288713 |
| 3.283333 | 0.02387512  | 0.1170762  | -1.330285 |
| 3.3      | 0.01790634  | 0.1170762  | -1.337213 |
| 3.316667 | 0.005968781 | 0.1305889  | -1.30257  |
| 3.333333 | 0.04178147  | 0.13959    | -1.295642 |
| 3.35     | 0.06565659  | 0.1711137  | -1.330285 |
| 3.366667 | 0.04178147  | 0.15761    | -1.351071 |
| 3.383333 | 0.04775025  | 0.1576055  | -1.357999 |
| 3.4      | 0.04178147  | 0.1080751  | -1.371856 |
| 3.416667 | 0.03581268  | 0.1531027  | -1.385713 |
| 3.433333 | 0.01193756  | 0.1215834  | -1.385713 |
| 3.45     | 0.05968781  | 0.1395945  | -1.39957  |
| 3.466667 | 0.04178147  | 0.1486     | -1.427285 |
| 3.483333 | 0.03581268  | 0.1260817  | -1.44807  |
| 3.5      | 0.04775025  | 0.1711182  | -1.461928 |
| 3.516667 | 0.04178147  | 0.1260862  | -1.44807  |
| 3.533333 | 0.03581268  | 0.1215834  | -1.44807  |
| 3.55     | 0.04775025  | 0.1215834  | -1.461928 |
| 3.566667 | 0.06565659  | 0.09005962 | -1.461928 |
| 3.583333 | 0.005968781 | 0.1035679  | -1.482713 |
| 3.6      | 0.04178147  | 0.1395945  | -1.49657  |
| 3.616667 | 0.04178147  | 0.1440972  | -1.475785 |
| 3.633333 | 0.02387512  | 0.1170807  | -1.461928 |
| 3.65     | 0.04178147  | 0.1576055  | -1.475785 |
| 3.666667 | 0.0298439   | 0.1531072  | -1.503499 |
| 3.683333 | 0.0298439   | 0.1215834  | -1.517356 |
| 3.7      | 0.01790634  | 0.1350917  | -1.524285 |
| 3.716667 | 0.06565659  | 0.1260862  | -1.538142 |
| 3.733333 | 0.0298439   | 0.1260862  | -1.551999 |
| 3.75     | 0.03581268  | 0.06754585 | -1.551999 |
| 3.766667 | 0.0298439   | 0.1350917  | -1.558927 |
| 3.783333 | 0.03581268  | 0.1350917  | -1.558927 |
| 3.8      | 0.05371903  | 0.1576055  | -1.558927 |

|          |             |            |           |
|----------|-------------|------------|-----------|
| 3.816667 | 0.02387512  | 0.1260862  | -1.572785 |
| 3.833333 | 0.05371903  | 0.1576055  | -1.586642 |
| 3.85     | 0.05968781  | 0.1395945  | -1.59357  |
| 3.866667 | 0.04178147  | 0.07655136 | -1.572785 |
| 3.883333 | 0.0298439   | 0.1215789  | -1.565856 |
| 3.9      | 0.02387512  | 0.1035679  | -1.600499 |
| 3.916667 | 0.0298439   | 0.09005962 | -1.621285 |
| 3.933333 | 0.04775025  | 0.1621082  | -1.607427 |
| 3.95     | 0.04775025  | 0.1035724  | -1.607427 |
| 3.966667 | 0.0298439   | 0.1215834  | -1.628213 |
| 3.983333 | 0.04178147  | 0.1350917  | -1.648999 |
| 4        | 0.0298439   | 0.1215834  | -1.635142 |
| 4.016667 | 0.06565659  | 0.1531027  | -1.635142 |
| 4.033333 | 0.01790634  | 0.1395945  | -1.662856 |
| 4.05     | 0.04775025  | 0.08105411 | -1.676713 |
| 4.066667 | 0.05968781  | 0.09906514 | -1.662856 |
| 4.083333 | 0.01193756  | 0.1305889  | -1.669785 |
| 4.1      | 0.01193756  | 0.1440972  | -1.683642 |
| 4.116667 | 0.0298439   | 0.09005962 | -1.676713 |
| 4.133333 | 0.04178147  | 0.09906514 | -1.676713 |
| 4.15     | 0.0298439   | 0.1215789  | -1.676713 |
| 4.166667 | 0.04178147  | 0.1486     | -1.676713 |
| 4.183333 | 0.005968781 | 0.1305889  | -1.662856 |
| 4.2      | 0.0298439   | 0.1170807  | -1.635142 |
| 4.216667 | 0.01790634  | 0.1125734  | -1.614356 |
| 4.233333 | 0.04178147  | 0.1305889  | -1.607427 |
| 4.25     | 0.04178147  | 0.1711137  | -1.614356 |
| 4.266667 | 0.02387512  | 0.1035724  | -1.635142 |
| 4.283333 | 0.03581268  | 0.1215789  | -1.64207  |
| 4.3      | 0.03581268  | 0.1621082  | -1.635142 |
| 4.316667 | 0.0298439   | 0.1440972  | -1.628213 |
| 4.333333 | 0.07162537  | 0.1260862  | -1.64207  |
| 4.35     | 0.02387512  | 0.1486     | -1.64207  |
| 4.366667 | 0.06565659  | 0.1350917  | -1.64207  |
| 4.383333 | 0.0298439   | 0.1080751  | -1.635142 |
| 4.4      | 0.07162537  | 0.1440972  | -1.600499 |
| 4.416667 | 0.03581268  | 0.1621082  | -1.565856 |
| 4.433333 | 0.04178147  | 0.1170807  | -1.558927 |
| 4.45     | 0.05968781  | 0.1801238  | -1.565856 |
| 4.466667 | 0.02387512  | 0.1395945  | -1.572785 |
| 4.483333 | 0.03581268  | 0.1350917  | -1.579713 |
| 4.5      | 0.04178147  | 0.09906514 | -1.565856 |
| 4.516667 | 0.0298439   | 0.09456238 | -1.558927 |
| 4.533333 | 0.03581268  | 0.1305844  | -1.572785 |
| 4.55     | 0.02387512  | 0.1305889  | -1.600499 |
| 4.566667 | 0.03581268  | 0.1215789  | -1.614356 |
| 4.583333 | 0.01790634  | 0.1260862  | -1.621285 |

|          |             |            |           |
|----------|-------------|------------|-----------|
| 4.6      | 0.05968781  | 0.1350917  | -1.614356 |
| 4.616667 | 0.02387512  | 0.1350917  | -1.600499 |
| 4.633333 | 0.02387512  | 0.1440972  | -1.579713 |
| 4.65     | 0.05371903  | 0.1350917  | -1.565856 |
| 4.666667 | 0.03581268  | 0.1350917  | -1.558927 |
| 4.683333 | 0.05968781  | 0.1215789  | -1.54507  |
| 4.7      | 0.01790634  | 0.1215834  | -1.538142 |
| 4.716667 | 0.05371903  | 0.1170762  | -1.538142 |
| 4.733333 | 0.05968781  | 0.1035679  | -1.54507  |
| 4.75     | 0.04178147  | 0.1305889  | -1.54507  |
| 4.766667 | 0.04178147  | 0.1395945  | -1.572785 |
| 4.783333 | 0.04775025  | 0.09005962 | -1.579713 |
| 4.8      | 0.01790634  | 0.1801192  | -1.572785 |
| 4.816667 | 0.05371903  | 0.1260862  | -1.565856 |
| 4.833333 | 0.0298439   | 0.1756165  | -1.565856 |
| 4.85     | 0.05968781  | 0.1125779  | -1.558927 |
| 4.866667 | 0.01790634  | 0.1531027  | -1.551999 |
| 4.883333 | 0.05968781  | 0.1621127  | -1.551999 |
| 4.9      | 0.07162537  | 0.1170807  | -1.551999 |
| 4.916667 | 0.0298439   | 0.1395945  | -1.54507  |
| 4.933333 | 0.0298439   | 0.1395945  | -1.538142 |
| 4.95     | 0.04775025  | 0.1621082  | -1.531213 |
| 4.966667 | 0.005968781 | 0.1215834  | -1.531213 |
| 4.983333 | 0.04775025  | 0.1125734  | -1.531213 |
| 5        | 0.0298439   | 0.1080706  | -1.531213 |
| 5.016667 | 0.04178147  | 0.09906514 | -1.524285 |
| 5.033333 | 0.0298439   | 0.1260817  | -1.517356 |
| 5.05     | 0.05968781  | 0.1486     | -1.517356 |
| 5.066667 | 0.04178147  | 0.1125779  | -1.524285 |
| 5.083333 | 0.05371903  | 0.1621082  | -1.517356 |
| 5.1      | 0.03581268  | 0.1080706  | -1.517356 |
| 5.116667 | 0.06565659  | 0.1125734  | -1.524285 |
| 5.133333 | 0.04178147  | 0.1440972  | -1.531213 |
| 5.15     | 0.01790634  | 0.1215834  | -1.538142 |
| 5.166667 | 0.02387512  | 0.1215789  | -1.517356 |
| 5.183333 | 0.0298439   | 0.1350917  | -1.489642 |
| 5.2      | 0.07759415  | 0.1260862  | -1.489642 |
| 5.216667 | 0.05968781  | 0.1395945  | -1.503499 |
| 5.233333 | 0.02387512  | 0.1621127  | -1.517356 |
| 5.25     | 0.05968781  | 0.1035679  | -1.510427 |
| 5.266667 | 0.0298439   | 0.1260817  | -1.503499 |
| 5.283333 | 0.04775025  | 0.1080706  | -1.49657  |
| 5.3      | 0.04178147  | 0.1395945  | -1.503499 |
| 5.316667 | 0.03581268  | 0.1395945  | -1.531213 |
| 5.333333 | 0.01790634  | 0.1035679  | -1.538142 |
| 5.35     | 0.06565659  | 0.1170762  | -1.524285 |
| 5.366667 | 0.04178147  | 0.1486     | -1.517356 |

|          |            |            |           |
|----------|------------|------------|-----------|
| 5.383333 | 0.0298439  | 0.1035679  | -1.524285 |
| 5.4      | 0.01790634 | 0.1305889  | -1.538142 |
| 5.416667 | 0.0298439  | 0.1576055  | -1.551999 |
| 5.433333 | 0.03581268 | 0.1846265  | -1.565856 |
| 5.45     | 0.07162537 | 0.1125779  | -1.565856 |
| 5.466667 | 0.04178147 | 0.1621082  | -1.565856 |
| 5.483333 | 0.04775025 | 0.1080706  | -1.565856 |
| 5.5      | 0.0298439  | 0.1305844  | -1.572785 |
| 5.516667 | 0.04775025 | 0.1531027  | -1.586642 |
| 5.533333 | 0.0298439  | 0.1395945  | -1.586642 |
| 5.55     | 0.03581268 | 0.139599   | -1.586642 |
| 5.566667 | 0.06565659 | 0.1576055  | -1.565856 |
| 5.583333 | 0.0298439  | 0.1215834  | -1.558927 |
| 5.6      | 0.03581268 | 0.1395945  | -1.572785 |
| 5.616667 | 0.02387512 | 0.1801238  | -1.586642 |
| 5.633333 | 0.03581268 | 0.1305889  | -1.600499 |
| 5.65     | 0.01790634 | 0.1125779  | -1.621285 |
| 5.666667 | 0.02387512 | 0.1350872  | -1.635142 |
| 5.683333 | 0.05968781 | 0.1441017  | -1.648999 |
| 5.7      | 0.0298439  | 0.09456238 | -1.648999 |
| 5.716667 | 0.02387512 | 0.1080706  | -1.655927 |
| 5.733333 | 0.02387512 | 0.1125734  | -1.662856 |
| 5.75     | 0.03581268 | 0.1531027  | -1.669785 |
| 5.766667 | 0.0298439  | 0.1531072  | -1.683642 |
| 5.783333 | 0.05371903 | 0.09005962 | -1.704427 |
| 5.8      | 0.02387512 | 0.1350872  | -1.718284 |
| 5.816667 | 0.04775025 | 0.1395945  | -1.711356 |
| 5.833333 | 0.0298439  | 0.1260862  | -1.718284 |
| 5.85     | 0.01790634 | 0.1576055  | -1.725213 |
| 5.866667 | 0.0298439  | 0.1395945  | -1.725213 |
| 5.883333 | 0.07162537 | 0.1440972  | -1.718284 |
| 5.9      | 0.05968781 | 0.1395945  | -1.725213 |
| 5.916667 | 0.0298439  | 0.1440972  | -1.759856 |
| 5.933333 | 0.05371903 | 0.1350917  | -1.780642 |
| 5.95     | 0.04775025 | 0.1486045  | -1.773713 |
| 5.966667 | 0.04178147 | 0.15761    | -1.759856 |
| 5.983333 | 0.03581268 | 0.1125779  | -1.752927 |
| 6        | 0.03581268 | 0.166611   | -1.766784 |
| 6.016667 | 0.04775025 | 0.1170807  | -1.780642 |
| 6.033333 | 0.04178147 | 0.1170807  | -1.808356 |
| 6.05     | 0.0298439  | 0.09005962 | -1.815284 |
| 6.066667 | 0.05371903 | 0.1260817  | -1.808356 |
| 6.083333 | 0.05371903 | 0.1260817  | -1.815284 |
| 6.1      | 0.04178147 | 0.1981393  | -1.842999 |
| 6.116667 | 0.04775025 | 0.1305889  | -1.849927 |
| 6.133333 | 0.05968781 | 0.1576055  | -1.849927 |
| 6.15     | 0.03581268 | 0.1440972  | -1.849927 |



|          |             |            |           |
|----------|-------------|------------|-----------|
| 6.166667 | 0.0298439   | 0.1125734  | -1.870713 |
| 6.183333 | 0.04775025  | 0.1440972  | -1.891499 |
| 6.2      | 0.05371903  | 0.1215834  | -1.898427 |
| 6.216667 | 0.02387512  | 0.1395945  | -1.891499 |
| 6.233333 | 0.0298439   | 0.1621127  | -1.877642 |
| 6.25     | 0.04178147  | 0.1531027  | -1.88457  |
| 6.266667 | 0.03581268  | 0.1260862  | -1.905356 |
| 6.283333 | 0.05968781  | 0.1035679  | -1.919213 |
| 6.3      | 0.05371903  | 0.1621082  | -1.946927 |
| 6.316667 | 0.0298439   | 0.1215834  | -1.960784 |
| 6.333333 | 0.03581268  | 0.1350917  | -1.967713 |
| 6.35     | 0.04775025  | 0.1576055  | -1.98157  |
| 6.366667 | 0.03581268  | 0.1441017  | -1.995427 |
| 6.383333 | 0.0298439   | 0.1035679  | -2.009284 |
| 6.4      | 0.08356293  | 0.1350872  | -2.023141 |
| 6.416667 | 0.03581268  | 0.09906514 | -2.03007  |
| 6.433333 | 0.04178147  | 0.1305844  | -2.023141 |
| 6.45     | 0.04178147  | 0.1215834  | -2.009284 |
| 6.466667 | 0.04775025  | 0.1395945  | -2.016213 |
| 6.483333 | 0.02387512  | 0.1486     | -2.050856 |
| 6.5      | 0.04775025  | 0.1035679  | -2.07857  |
| 6.516667 | 0.0298439   | 0.1215789  | -2.085499 |
| 6.533333 | 0.005968781 | 0.1260862  | -2.092427 |
| 6.55     | 0.02387512  | 0.1486     | -2.120141 |
| 6.566667 | 0.04178147  | 0.1350917  | -2.133998 |
| 6.583333 | 0.03581268  | 0.13959    | -2.12707  |
| 6.6      | 0.02387512  | 0.1125779  | -2.154784 |
| 6.616667 | 0.06565659  | 0.1440927  | -2.17557  |
| 6.633333 | 0.03581268  | 0.1215834  | -2.182498 |
| 6.65     | 0.02387512  | 0.1170807  | -2.168641 |
| 6.666667 | 0.02387512  | 0.1215834  | -2.161713 |
| 6.683333 | 0.01790634  | 0.1260862  | -2.168641 |
| 6.7      | 0.03581268  | 0.1350917  | -2.196356 |
| 6.716667 | 0.0298439   | 0.1035679  | -2.217141 |
| 6.733333 | 0.01193756  | 0.1486     | -2.22407  |
| 6.75     | 0.04178147  | 0.1215789  | -2.230999 |
| 6.766667 | 0.01790634  | 0.1621082  | -2.244856 |
| 6.783333 | 0.05371903  | 0.1215834  | -2.265641 |
| 6.8      | 0.05371903  | 0.1711137  | -2.279498 |
| 6.816667 | 0.04775025  | 0.1125779  | -2.258713 |
| 6.833333 | 0.04178147  | 0.1170762  | -2.244856 |
| 6.85     | 0.05371903  | 0.09456238 | -2.258713 |
| 6.866667 | 0.02387512  | 0.1576055  | -2.265641 |
| 6.883333 | 0.05371903  | 0.1125734  | -2.279498 |
| 6.9      | 0.0298439   | 0.1260862  | -2.300284 |
| 6.916667 | 0.04775025  | 0.1260862  | -2.314141 |
| 6.933333 | 0.02387512  | 0.166611   | -2.341856 |

|          |            |            |           |
|----------|------------|------------|-----------|
| 6.95     | 0.05968781 | 0.139599   | -2.355713 |
| 6.966667 | 0.02387512 | 0.1260817  | -2.348784 |
| 6.983333 | 0.05968781 | 0.1486     | -2.355713 |
| 7        | 0.05968781 | 0.1215834  | -2.362641 |
| 7.016667 | 0.04178147 | 0.1080706  | -2.376498 |
| 7.033333 | 0.02387512 | 0.1711182  | -2.404212 |
| 7.05     | 0.01790634 | 0.1125779  | -2.404212 |
| 7.066667 | 0.0298439  | 0.1305889  | -2.397284 |
| 7.083333 | 0.04178147 | 0.1125734  | -2.411141 |
| 7.1      | 0.04178147 | 0.1576055  | -2.424998 |
| 7.116667 | 0.01193756 | 0.1801238  | -2.438855 |
| 7.133333 | 0.04178147 | 0.1395945  | -2.459641 |
| 7.15     | 0.04178147 | 0.1801238  | -2.480427 |
| 7.166667 | 0.03581268 | 0.1215834  | -2.508141 |
| 7.183333 | 0.04178147 | 0.1395945  | -2.508141 |
| 7.2      | 0.05968781 | 0.09005962 | -2.51507  |
| 7.216667 | 0.0298439  | 0.1621082  | -2.528927 |
| 7.233333 | 0.0298439  | 0.1215834  | -2.535855 |
| 7.25     | 0.04775025 | 0.09005962 | -2.51507  |
| 7.266667 | 0.07162537 | 0.1170762  | -2.487355 |
| 7.283333 | 0.04775025 | 0.1711137  | -2.473498 |
| 7.3      | 0.04775025 | 0.1801283  | -2.494284 |
| 7.316667 | 0.01790634 | 0.09906514 | -2.51507  |
| 7.333333 | 0.04775025 | 0.1305889  | -2.521998 |
| 7.35     | 0.04178147 | 0.1440972  | -2.542784 |
| 7.366667 | 0.08356293 | 0.1350917  | -2.556641 |
| 7.383333 | 0.05371903 | 0.166611   | -2.56357  |
| 7.4      | 0.03581268 | 0.1486045  | -2.556641 |
| 7.416667 | 0.0298439  | 0.1531027  | -2.556641 |
| 7.433333 | 0.02387512 | 0.1215834  | -2.577427 |
| 7.45     | 0.03581268 | 0.1576055  | -2.618998 |
| 7.466667 | 0.04775025 | 0.1125734  | -2.632855 |
| 7.483333 | 0.03581268 | 0.1531072  | -2.639784 |
| 7.5      | 0.04775025 | 0.1486     | -2.625927 |
| 7.516667 | 0.04178147 | 0.139599   | -2.618998 |
| 7.533333 | 0.04775025 | 0.1801238  | -2.653641 |
| 7.55     | 0.02387512 | 0.1350917  | -2.702141 |
| 7.566667 | 0.04775025 | 0.1215834  | -2.709069 |
| 7.583333 | 0.0298439  | 0.1801238  | -2.702141 |
| 7.6      | 0.05371903 | 0.1215834  | -2.715998 |
| 7.616667 | 0.05371903 | 0.1215789  | -2.729855 |
| 7.633333 | 0.05371903 | 0.1666155  | -2.715998 |
| 7.65     | 0.01790634 | 0.1531072  | -2.695212 |
| 7.666667 | 0.05371903 | 0.1395945  | -2.702141 |
| 7.683333 | 0.03581268 | 0.1621082  | -2.743712 |
| 7.7      | 0.03581268 | 0.1395945  | -2.75757  |
| 7.716667 | 0.04775025 | 0.1486     | -2.750641 |

|          |            |            |           |
|----------|------------|------------|-----------|
| 7.733333 | 0.04178147 | 0.1215834  | -2.750641 |
| 7.75     | 0.02387512 | 0.09906514 | -2.764498 |
| 7.766667 | 0.03581268 | 0.1035679  | -2.792212 |
| 7.783333 | 0.0298439  | 0.1215834  | -2.806069 |
| 7.8      | 0.0298439  | 0.1576055  | -2.812998 |
| 7.816667 | 0.0298439  | 0.1035724  | -2.819927 |
| 7.833333 | 0.06565659 | 0.1215789  | -2.806069 |
| 7.85     | 0.07162537 | 0.1260862  | -2.819927 |
| 7.866667 | 0.03581268 | 0.1260862  | -2.847641 |
| 7.883333 | 0.05371903 | 0.1395945  | -2.861498 |
| 7.9      | 0.01790634 | 0.1035679  | -2.861498 |
| 7.916667 | 0.04178147 | 0.1170762  | -2.861498 |
| 7.933333 | 0.05968781 | 0.1440972  | -2.847641 |
| 7.95     | 0.05968781 | 0.1170807  | -2.833784 |
| 7.966667 | 0.01193756 | 0.1125734  | -2.840712 |
| 7.983333 | 0.04178147 | 0.184622   | -2.875355 |
| 8        | 0.05371903 | 0.1305889  | -2.896141 |
| 8.016666 | 0.05968781 | 0.1080706  | -2.889212 |
| 8.033334 | 0.04775025 | 0.1035679  | -2.875355 |
| 8.05     | 0.05371903 | 0.1395945  | -2.889212 |
| 8.066667 | 0.0298439  | 0.1035724  | -2.903069 |
| 8.083333 | 0.05968781 | 0.1035679  | -2.875355 |
| 8.1      | 0.04775025 | 0.1576055  | -2.847641 |
| 8.116667 | 0.05371903 | 0.1215834  | -2.854569 |
| 8.133333 | 0.05968781 | 0.1395945  | -2.889212 |
| 8.15     | 0.06565659 | 0.1395945  | -2.916926 |
| 8.166667 | 0.0298439  | 0.1350917  | -2.951569 |
| 8.183333 | 0.03581268 | 0.1395945  | -2.979284 |
| 8.2      | 0.03581268 | 0.1486     | -2.979284 |
| 8.216666 | 0.05968781 | 0.1486045  | -2.972355 |
| 8.233334 | 0.03581268 | 0.1080706  | -2.979284 |
| 8.25     | 0.07759415 | 0.1305889  | -2.993141 |
| 8.266666 | 0.07162537 | 0.08555687 | -2.986212 |
| 8.283334 | 0.0298439  | 0.1350917  | -2.958498 |
| 8.3      | 0.05968781 | 0.1756165  | -2.958498 |
| 8.316667 | 0.04178147 | 0.1035679  | -3.000069 |
| 8.333333 | 0.04775025 | 0.1305889  | -3.013927 |
| 8.35     | 0.03581268 | 0.1440972  | -2.993141 |
| 8.366667 | 0.04178147 | 0.1756165  | -3.006998 |
| 8.383333 | 0.08356293 | 0.1441017  | -3.041641 |
| 8.4      | 0.04775025 | 0.0720486  | -3.034712 |
| 8.416667 | 0.07162537 | 0.1035679  | -3.013927 |
| 8.433333 | 0.03581268 | 0.09906514 | -3.000069 |
| 8.45     | 0.05968781 | 0.1576055  | -2.993141 |
| 8.466666 | 0.08356293 | 0.1486     | -3.000069 |
| 8.483334 | 0.04178147 | 0.1035679  | -3.027784 |
| 8.5      | 0.03581268 | 0.1395945  | -3.069355 |

|          |             |            |           |
|----------|-------------|------------|-----------|
| 8.516666 | 0.06565659  | 0.1350917  | -3.103998 |
| 8.533334 | 0.04775025  | 0.1711137  | -3.103998 |
| 8.55     | 0.02387512  | 0.1350917  | -3.090141 |
| 8.566667 | 0.05371903  | 0.08105411 | -3.110926 |
| 8.583333 | 0.06565659  | 0.1440972  | -3.138641 |
| 8.6      | 0.03581268  | 0.1846265  | -3.152498 |
| 8.616667 | 0.06565659  | 0.1215834  | -3.145569 |
| 8.633333 | 0.06565659  | 0.1080706  | -3.138641 |
| 8.65     | 0.05968781  | 0.1440972  | -3.138641 |
| 8.666667 | 0.02387512  | 0.1576055  | -3.131712 |
| 8.683333 | 0.08953171  | 0.1531027  | -3.131712 |
| 8.7      | 0.0298439   | 0.1350917  | -3.152498 |
| 8.716666 | 0.03581268  | 0.1440972  | -3.173283 |
| 8.733334 | 0.08953171  | 0.1305889  | -3.159426 |
| 8.75     | 0.05968781  | 0.09005962 | -3.152498 |
| 8.766666 | 0.04775025  | 0.1215789  | -3.159426 |
| 8.783334 | 0.05968781  | 0.1350917  | -3.166355 |
| 8.8      | 0.02387512  | 0.1035724  | -3.166355 |
| 8.816667 | 0.04178147  | 0.1350917  | -3.173283 |
| 8.833333 | 0.03581268  | 0.1305889  | -3.18714  |
| 8.85     | 0.04178147  | 0.175621   | -3.194069 |
| 8.866667 | 0.05371903  | 0.08555687 | -3.18714  |
| 8.883333 | 0.02387512  | 0.1260817  | -3.166355 |
| 8.9      | 0.05371903  | 0.1350917  | -3.159426 |
| 8.916667 | 0.04775025  | 0.0720486  | -3.173283 |
| 8.933333 | 0.04775025  | 0.166611   | -3.200998 |
| 8.95     | 0.04775025  | 0.1260862  | -3.235641 |
| 8.966666 | 0.04178147  | 0.1305844  | -3.249498 |
| 8.983334 | 0.05371903  | 0.1486045  | -3.249498 |
| 9        | 0.05968781  | 0.1486     | -3.242569 |
| 9.016666 | 0.05968781  | 0.1170807  | -3.242569 |
| 9.033334 | 0.03581268  | 0.1440972  | -3.256426 |
| 9.05     | 0.06565659  | 0.1125734  | -3.277212 |
| 9.066667 | 0.04178147  | 0.1170762  | -3.297998 |
| 9.083333 | 0.05371903  | 0.1215789  | -3.291069 |
| 9.1      | 0.05968781  | 0.1486     | -3.291069 |
| 9.116667 | 0.01790634  | 0.1080706  | -3.297998 |
| 9.133333 | 0.05371903  | 0.1305889  | -3.304926 |
| 9.15     | 0.02387512  | 0.09456238 | -3.311855 |
| 9.166667 | 0.02387512  | 0.09456238 | -3.318783 |
| 9.183333 | 0.005968781 | 0.1576055  | -3.325712 |
| 9.2      | 0.04775025  | 0.1260862  | -3.325712 |
| 9.216666 | 0.05968781  | 0.09906514 | -3.33264  |
| 9.233334 | 0.04178147  | 0.1125734  | -3.339569 |
| 9.25     | 0.05968781  | 0.1215834  | -3.339569 |
| 9.266666 | 0.05371903  | 0.08105411 | -3.353426 |
| 9.283334 | 0.02387512  | 0.1260862  | -3.374212 |

|          |            |            |           |
|----------|------------|------------|-----------|
| 9.3      | 0.04775025 | 0.09456238 | -3.388069 |
| 9.316667 | 0.04775025 | 0.1260817  | -3.388069 |
| 9.333333 | 0.02387512 | 0.1350917  | -3.388069 |
| 9.35     | 0.05968781 | 0.1260817  | -3.394998 |
| 9.366667 | 0.04775025 | 0.1080751  | -3.388069 |
| 9.383333 | 0.05371903 | 0.09005962 | -3.388069 |
| 9.4      | 0.04775025 | 0.1531027  | -3.408855 |
| 9.416667 | 0.05968781 | 0.1350917  | -3.42964  |
| 9.433333 | 0.01193756 | 0.1440972  | -3.436569 |
| 9.45     | 0.04775025 | 0.1395945  | -3.450426 |
| 9.466666 | 0.0298439  | 0.1215834  | -3.471212 |
| 9.483334 | 0.04178147 | 0.1170762  | -3.471212 |
| 9.5      | 0.02387512 | 0.1350917  | -3.47814  |
| 9.516666 | 0.02387512 | 0.1395945  | -3.498926 |
| 9.533334 | 0.0298439  | 0.1305889  | -3.512783 |
| 9.55     | 0.05968781 | 0.1440972  | -3.498926 |
| 9.566667 | 0.03581268 | 0.1170762  | -3.47814  |
| 9.583333 | 0.01790634 | 0.1260862  | -3.485069 |
| 9.6      | 0.05371903 | 0.1215834  | -3.498926 |
| 9.616667 | 0.01193756 | 0.1260862  | -3.512783 |
| 9.633333 | 0.01790634 | 0.166611   | -3.505855 |
| 9.65     | 0.02387512 | 0.1711182  | -3.498926 |
| 9.666667 | 0.04178147 | 0.08555687 | -3.519712 |
| 9.683333 | 0.04178147 | 0.1305889  | -3.547426 |
| 9.7      | 0.06565659 | 0.1260862  | -3.547426 |
| 9.716666 | 0.0298439  | 0.1486     | -3.52664  |
| 9.733334 | 0.01790634 | 0.1170807  | -3.505855 |
| 9.75     | 0.04178147 | 0.1305889  | -3.505855 |
| 9.766666 | 0.04178147 | 0.1395945  | -3.519712 |
| 9.783334 | 0.02387512 | 0.1576055  | -3.540498 |
| 9.8      | 0.01790634 | 0.1440972  | -3.57514  |
| 9.816667 | 0.0298439  | 0.1350917  | -3.582069 |
| 9.833333 | 0.0298439  | 0.1350917  | -3.582069 |
| 9.85     | 0.0298439  | 0.1035679  | -3.588997 |
| 9.866667 | 0.04178147 | 0.1035679  | -3.588997 |
| 9.883333 | 0.05968781 | 0.1305889  | -3.588997 |
| 9.9      | 0.0298439  | 0.1170762  | -3.588997 |
| 9.916667 | 0.07759415 | 0.1350917  | -3.602854 |
| 9.933333 | 0.03581268 | 0.1260862  | -3.62364  |
| 9.95     | 0.03581268 | 0.15761    | -3.62364  |
| 9.966666 | 0.03581268 | 0.1440972  | -3.630569 |
| 9.983334 | 0.05371903 | 0.1035679  | -3.651355 |
| 10       | 0.02387512 | 0.184622   | -3.644426 |
| 10.01667 | 0.02387512 | 0.1170807  | -3.637497 |
| 10.03333 | 0.04775025 | 0.1395945  | -3.644426 |
| 10.05    | 0.04178147 | 0.1215834  | -3.637497 |
| 10.06667 | 0.0298439  | 0.1170762  | -3.62364  |

|          |            |            |           |
|----------|------------|------------|-----------|
| 10.08333 | 0.02387512 | 0.1440972  | -3.62364  |
| 10.1     | 0.01790634 | 0.1035679  | -3.637497 |
| 10.11667 | 0.04775025 | 0.1125734  | -3.651355 |
| 10.13333 | 0.04178147 | 0.1801238  | -3.679069 |
| 10.15    | 0.0298439  | 0.1170807  | -3.692926 |
| 10.16667 | 0.04775025 | 0.1756165  | -3.67214  |
| 10.18333 | 0.05371903 | 0.1170807  | -3.658283 |
| 10.2     | 0.05371903 | 0.1035679  | -3.679069 |
| 10.21667 | 0.04775025 | 0.1666155  | -3.706783 |
| 10.23333 | 0.03581268 | 0.1350917  | -3.72064  |
| 10.25    | 0.04775025 | 0.1486     | -3.727569 |
| 10.26667 | 0.0298439  | 0.1260817  | -3.727569 |
| 10.28333 | 0.03581268 | 0.1350917  | -3.727569 |
| 10.3     | 0.03581268 | 0.1305889  | -3.727569 |
| 10.31667 | 0.01790634 | 0.1395945  | -3.741426 |
| 10.33333 | 0.02387512 | 0.1350917  | -3.734497 |
| 10.35    | 0.05371903 | 0.1440972  | -3.727569 |
| 10.36667 | 0.02387512 | 0.1801238  | -3.734497 |
| 10.38333 | 0.0298439  | 0.1711182  | -3.741426 |
| 10.4     | 0.05371903 | 0.1080706  | -3.76914  |
| 10.41667 | 0.05371903 | 0.1440972  | -3.776069 |
| 10.43333 | 0.04775025 | 0.09005962 | -3.755283 |
| 10.45    | 0.02387512 | 0.1125734  | -3.727569 |
| 10.46667 | 0.0298439  | 0.09906514 | -3.734497 |
| 10.48333 | 0.03581268 | 0.1305889  | -3.748354 |
| 10.5     | 0.05968781 | 0.1801192  | -3.748354 |
| 10.51667 | 0.04178147 | 0.1035724  | -3.734497 |
| 10.53333 | 0.05968781 | 0.1305889  | -3.72064  |
| 10.55    | 0.03581268 | 0.1350917  | -3.734497 |
| 10.56667 | 0.04178147 | 0.1440972  | -3.76914  |
| 10.58333 | 0.03581268 | 0.166611   | -3.803783 |
| 10.6     | 0.0298439  | 0.1350917  | -3.810712 |
| 10.61667 | 0.05371903 | 0.1080706  | -3.803783 |
| 10.63333 | 0.0298439  | 0.1125734  | -3.803783 |
| 10.65    | 0.05371903 | 0.1440972  | -3.810712 |
| 10.66667 | 0.03581268 | 0.1936365  | -3.803783 |
| 10.68333 | 0.04178147 | 0.1215834  | -3.776069 |
| 10.7     | 0.0298439  | 0.1215834  | -3.76914  |
| 10.71667 | 0.02387512 | 0.09005962 | -3.782997 |
| 10.73333 | 0.05968781 | 0.1260817  | -3.789926 |
| 10.75    | 0.01790634 | 0.1350917  | -3.782997 |
| 10.76667 | 0.04775025 | 0.1170807  | -3.796854 |
| 10.78333 | 0.02387512 | 0.1350917  | -3.803783 |
| 10.8     | 0.01790634 | 0.1035679  | -3.796854 |
| 10.81667 | 0.04178147 | 0.1305844  | -3.796854 |
| 10.83333 | 0.04775025 | 0.1440972  | -3.810712 |
| 10.85    | 0.05968781 | 0.202642   | -3.803783 |

|          |            |            |           |
|----------|------------|------------|-----------|
| 10.86667 | 0.0298439  | 0.1531072  | -3.803783 |
| 10.88333 | 0.02387512 | 0.1486045  | -3.81764  |
| 10.9     | 0.03581268 | 0.1350917  | -3.81764  |
| 10.91667 | 0.01193756 | 0.1125779  | -3.81764  |
| 10.93333 | 0.05968781 | 0.1170762  | -3.824569 |
| 10.95    | 0.05968781 | 0.1576055  | -3.831497 |
| 10.96667 | 0.05371903 | 0.1531072  | -3.845354 |
| 10.98333 | 0.0298439  | 0.1260862  | -3.859211 |
| 11       | 0.03581268 | 0.1080706  | -3.859211 |
| 11.01667 | 0.0298439  | 0.1440972  | -3.86614  |
| 11.03333 | 0.01790634 | 0.1080706  | -3.886926 |
| 11.05    | 0.05371903 | 0.1170762  | -3.900783 |
| 11.06667 | 0.03581268 | 0.1125734  | -3.900783 |
| 11.08333 | 0.07162537 | 0.1080706  | -3.900783 |
| 11.1     | 0.05968781 | 0.166611   | -3.907712 |
| 11.11667 | 0.04775025 | 0.1305889  | -3.921569 |
| 11.13333 | 0.0298439  | 0.1260817  | -3.921569 |
| 11.15    | 0.03581268 | 0.1350917  | -3.900783 |
| 11.16667 | 0.04178147 | 0.1215834  | -3.900783 |
| 11.18333 | 0.03581268 | 0.1756165  | -3.907712 |
| 11.2     | 0.06565659 | 0.1215834  | -3.907712 |
| 11.21667 | 0.05371903 | 0.1305889  | -3.900783 |
| 11.23333 | 0.07162537 | 0.1215789  | -3.91464  |
| 11.25    | 0.06565659 | 0.1215834  | -3.921569 |
| 11.26667 | 0.05371903 | 0.1260817  | -3.928497 |
| 11.28333 | 0.02387512 | 0.1125734  | -3.935426 |
| 11.3     | 0.04178147 | 0.1486     | -3.942354 |
| 11.31667 | 0.06565659 | 0.1125779  | -3.935426 |
| 11.33333 | 0.04178147 | 0.1305844  | -3.900783 |
| 11.35    | 0.03581268 | 0.1531072  | -3.886926 |
| 11.36667 | 0.0298439  | 0.1035724  | -3.893854 |
| 11.38333 | 0.04775025 | 0.1350872  | -3.907712 |
| 11.4     | 0.0298439  | 0.1395945  | -3.928497 |
| 11.41667 | 0.02387512 | 0.1125779  | -3.942354 |
| 11.43333 | 0.0298439  | 0.1891293  | -3.935426 |
| 11.45    | 0.02387512 | 0.1305889  | -3.921569 |
| 11.46667 | 0.01193756 | 0.1711182  | -3.91464  |
| 11.48333 | 0.05968781 | 0.1080706  | -3.935426 |
| 11.5     | 0.03581268 | 0.1486     | -3.96314  |
| 11.51667 | 0.04178147 | 0.1486045  | -3.983926 |
| 11.53333 | 0.04178147 | 0.175621   | -3.983926 |
| 11.55    | 0.02387512 | 0.1666155  | -3.956212 |
| 11.56667 | 0.0298439  | 0.1080706  | -3.935426 |
| 11.58333 | 0.04178147 | 0.09906514 | -3.935426 |
| 11.6     | 0.05968781 | 0.1395945  | -3.942354 |
| 11.61667 | 0.05968781 | 0.1305889  | -3.949283 |
| 11.63333 | 0.01193756 | 0.1666155  | -3.949283 |

|          |            |            |           |
|----------|------------|------------|-----------|
| 11.65    | 0.0298439  | 0.1350917  | -3.970069 |
| 11.66667 | 0.06565659 | 0.08105411 | -3.990854 |
| 11.68333 | 0.05968781 | 0.1440927  | -4.004712 |
| 11.7     | 0.03581268 | 0.15761    | -4.025497 |
| 11.71667 | 0.04178147 | 0.1395945  | -4.032426 |
| 11.73333 | 0.05371903 | 0.09456238 | -4.018569 |
| 11.75    | 0.03581268 | 0.1035679  | -3.990854 |
| 11.76667 | 0.04775025 | 0.1260862  | -3.990854 |
| 11.78333 | 0.02387512 | 0.1531027  | -3.997783 |
| 11.8     | 0.03581268 | 0.1260862  | -4.004712 |
| 11.81667 | 0.03581268 | 0.1486     | -4.018569 |
| 11.83333 | 0.02387512 | 0.1486045  | -4.018569 |
| 11.85    | 0.03581268 | 0.1576055  | -4.01164  |
| 11.86667 | 0.05968781 | 0.1486     | -3.990854 |
| 11.88333 | 0.04178147 | 0.1395945  | -3.970069 |
| 11.9     | 0.05371903 | 0.1260862  | -3.990854 |
| 11.91667 | 0.03581268 | 0.1891293  | -4.01164  |
| 11.93333 | 0.0298439  | 0.09456238 | -4.01164  |
| 11.95    | 0.02387512 | 0.1395945  | -4.01164  |
| 11.96667 | 0.0298439  | 0.1305889  | -4.018569 |
| 11.98333 | 0.02387512 | 0.1350917  | -4.018569 |
| 12       | 0.04178147 | 0.1350917  | -3.997783 |
| 12.01667 | 0.04775025 | 0.1846265  | -3.997783 |
| 12.03333 | 0.0298439  | 0.1440972  | -4.01164  |
| 12.05    | 0.07759415 | 0.1305889  | -4.053211 |
| 12.06667 | 0.05371903 | 0.1305889  | -4.080925 |
| 12.08333 | 0.05371903 | 0.1440972  | -4.073997 |
| 12.1     | 0.05968781 | 0.1441017  | -4.046283 |
| 12.11667 | 0.03581268 | 0.09005962 | -4.025497 |
| 12.13333 | 0.05371903 | 0.1576055  | -4.039354 |
| 12.15    | 0.01790634 | 0.1305889  | -4.039354 |
| 12.16667 | 0.0298439  | 0.1260862  | -4.039354 |
| 12.18333 | 0.08356293 | 0.1440972  | -4.053211 |
| 12.2     | 0.0298439  | 0.1576055  | -4.046283 |
| 12.21667 | 0.03581268 | 0.1260862  | -4.039354 |
| 12.23333 | 0.04178147 | 0.1260862  | -4.053211 |
| 12.25    | 0.04178147 | 0.1395945  | -4.073997 |
| 12.26667 | 0.03581268 | 0.1395945  | -4.080925 |
| 12.28333 | 0.0298439  | 0.1621082  | -4.080925 |
| 12.3     | 0.04775025 | 0.1621127  | -4.087854 |
| 12.31667 | 0.0298439  | 0.1395945  | -4.094783 |
| 12.33333 | 0.0298439  | 0.1170807  | -4.101711 |
| 12.35    | 0.0298439  | 0.1666155  | -4.10864  |
| 12.36667 | 0.02387512 | 0.1621082  | -4.080925 |
| 12.38333 | 0.0298439  | 0.1215834  | -4.053211 |
| 12.4     | 0.03581268 | 0.1486     | -4.039354 |
| 12.41667 | 0.0298439  | 0.1440972  | -4.06014  |



|          |            |            |           |
|----------|------------|------------|-----------|
| 12.43333 | 0.05371903 | 0.1395945  | -4.080925 |
| 12.45    | 0.01790634 | 0.1260817  | -4.080925 |
| 12.46667 | 0.07162537 | 0.1305889  | -4.067069 |
| 12.48333 | 0.05371903 | 0.1621082  | -4.067069 |
| 12.5     | 0.02387512 | 0.09906964 | -4.087854 |
| 12.51667 | 0.04775025 | 0.1486     | -4.094783 |
| 12.53333 | 0.03581268 | 0.09005962 | -4.115569 |
| 12.55    | 0.03581268 | 0.1260817  | -4.129426 |
| 12.56667 | 0.05968781 | 0.175621   | -4.136354 |
| 12.58333 | 0.03581268 | 0.1350917  | -4.136354 |
| 12.6     | 0.02387512 | 0.1621127  | -4.129426 |
| 12.61667 | 0.03581268 | 0.1350917  | -4.115569 |
| 12.63333 | 0.07162537 | 0.1711182  | -4.101711 |
| 12.65    | 0.04178147 | 0.1170807  | -4.115569 |
| 12.66667 | 0.04775025 | 0.1486     | -4.129426 |
| 12.68333 | 0.05968781 | 0.1440972  | -4.129426 |
| 12.7     | 0.07162537 | 0.1035679  | -4.136354 |
| 12.71667 | 0.05371903 | 0.09906514 | -4.143283 |
| 12.73333 | 0.04178147 | 0.1440972  | -4.136354 |
| 12.75    | 0.05371903 | 0.1350917  | -4.115569 |
| 12.76667 | 0.06565659 | 0.1260862  | -4.094783 |
| 12.78333 | 0.06565659 | 0.1215834  | -4.115569 |
| 12.8     | 0.03581268 | 0.1305889  | -4.143283 |
| 12.81667 | 0.03581268 | 0.1260862  | -4.150211 |
| 12.83333 | 0.02387512 | 0.1215789  | -4.15714  |
| 12.85    | 0.0298439  | 0.1486     | -4.150211 |
| 12.86667 | 0.06565659 | 0.1125779  | -4.150211 |
| 12.88333 | 0.03581268 | 0.1576055  | -4.15714  |
| 12.9     | 0.05371903 | 0.1666155  | -4.164068 |
| 12.91667 | 0.08356293 | 0.1440972  | -4.170997 |
| 12.93333 | 0.07162537 | 0.09906514 | -4.164068 |
| 12.95    | 0.07162537 | 0.1486     | -4.129426 |
| 12.96667 | 0.07759415 | 0.09005962 | -4.122497 |
| 12.98333 | 0.06565659 | 0.1395945  | -4.15714  |
| 13       | 0.07759415 | 0.1531027  | -4.177926 |
| 13.01667 | 0.04178147 | 0.1350917  | -4.170997 |
| 13.03333 | 0.04775025 | 0.1395945  | -4.15714  |
| 13.05    | 0.06565659 | 0.1440972  | -4.170997 |
| 13.06667 | 0.05371903 | 0.09005962 | -4.20564  |
| 13.08333 | 0.02387512 | 0.1621082  | -4.219497 |
| 13.1     | 0.02387512 | 0.1531072  | -4.20564  |
| 13.11667 | 0.04178147 | 0.1440972  | -4.191783 |
| 13.13333 | 0.03581268 | 0.1035724  | -4.177926 |
| 13.15    | 0.04775025 | 0.1125734  | -4.170997 |
| 13.16667 | 0.0298439  | 0.09906514 | -4.164068 |
| 13.18333 | 0.04178147 | 0.1486     | -4.170997 |
| 13.2     | 0.0298439  | 0.1215834  | -4.184854 |

|          |            |            |           |
|----------|------------|------------|-----------|
| 13.21667 | 0.04178147 | 0.1440972  | -4.191783 |
| 13.23333 | 0.05968781 | 0.1260862  | -4.170997 |
| 13.25    | 0.03581268 | 0.1170807  | -4.143283 |
| 13.26667 | 0.01193756 | 0.1170762  | -4.129426 |
| 13.28333 | 0.04178147 | 0.1395945  | -4.129426 |
| 13.3     | 0.04775025 | 0.09456238 | -4.129426 |
| 13.31667 | 0.02387512 | 0.1080706  | -4.143283 |
| 13.33333 | 0.01193756 | 0.1125734  | -4.177926 |
| 13.35    | 0.0298439  | 0.1621082  | -4.20564  |
| 13.36667 | 0.05968781 | 0.1035724  | -4.198711 |
| 13.38333 | 0.04178147 | 0.1891293  | -4.20564  |
| 13.4     | 0.04178147 | 0.1350917  | -4.212568 |
| 13.41667 | 0.04775025 | 0.1666155  | -4.184854 |
| 13.43333 | 0.05968781 | 0.1395945  | -4.164068 |
| 13.45    | 0.05371903 | 0.1080706  | -4.191783 |
| 13.46667 | 0.04775025 | 0.04502756 | -4.219497 |
| 13.48333 | 0.01790634 | 0.1530982  | -4.212568 |
| 13.5     | 0.07162537 | 0.1170807  | -4.212568 |
| 13.51667 | 0.0298439  | 0.1305844  | -4.20564  |
| 13.53333 | 0.05371903 | 0.1125734  | -4.198711 |
| 13.55    | 0.08356293 | 0.1711182  | -4.20564  |
| 13.56667 | 0.07162537 | 0.1666155  | -4.226426 |
| 13.58333 | 0.05371903 | 0.1305889  | -4.219497 |
| 13.6     | 0.06565659 | 0.166611   | -4.198711 |
| 13.61667 | 0.04775025 | 0.1080751  | -4.198711 |
| 13.63333 | 0.05371903 | 0.1260817  | -4.212568 |
| 13.65    | 0.04775025 | 0.1305889  | -4.233354 |
| 13.66667 | 0.03581268 | 0.1395945  | -4.25414  |
| 13.68333 | 0.04775025 | 0.175621   | -4.25414  |
| 13.7     | 0.05371903 | 0.1080751  | -4.25414  |
| 13.71667 | 0.04775025 | 0.1576055  | -4.25414  |
| 13.73333 | 0.04775025 | 0.1486045  | -4.240283 |
| 13.75    | 0.06565659 | 0.1395945  | -4.233354 |
| 13.76667 | 0.04775025 | 0.1305889  | -4.226426 |
| 13.78333 | 0.06565659 | 0.1170807  | -4.226426 |
| 13.8     | 0.05371903 | 0.1125734  | -4.240283 |
| 13.81667 | 0.04775025 | 0.1891248  | -4.247211 |
| 13.83333 | 0.04775025 | 0.08555687 | -4.25414  |
| 13.85    | 0.04775025 | 0.09456238 | -4.247211 |
| 13.86667 | 0.06565659 | 0.1260817  | -4.219497 |
| 13.88333 | 0.05968781 | 0.1215789  | -4.212568 |
| 13.9     | 0.03581268 | 0.175621   | -4.226426 |
| 13.91667 | 0.04178147 | 0.1756165  | -4.247211 |
| 13.93333 | 0.04178147 | 0.1305889  | -4.25414  |
| 13.95    | 0.02387512 | 0.1080706  | -4.261068 |
| 13.96667 | 0.0298439  | 0.1486     | -4.267997 |
| 13.98333 | 0.0298439  | 0.09456238 | -4.281854 |

|          |             |           |           |
|----------|-------------|-----------|-----------|
| 14       | 0.04178147  | 0.1350917 | -4.281854 |
| 14.01667 | 0.06565659  | 0.1440972 | -4.288783 |
| 14.03333 | 0.0298439   | 0.1035679 | -4.295711 |
| 14.05    | 0.05371903  | 0.1440972 | -4.295711 |
| 14.06667 | 0.05968781  | 0.1260862 | -4.295711 |
| 14.08333 | 0.03581268  | 0.1215789 | -4.295711 |
| 14.1     | 0.04775025  | 0.1711182 | -4.288783 |
| 14.11667 | 0.04178147  | 0.1621082 | -4.288783 |
| 14.13333 | 0.04178147  | 0.1260862 | -4.295711 |
| 14.15    | 0.03581268  | 0.1711137 | -4.295711 |
| 14.16667 | 0.1014693   | 0.1170807 | -4.288783 |
| 14.18333 | 0.04178147  | 0.1170807 | -4.295711 |
| 14.2     | 0.03581268  | 0.1621127 | -4.316497 |
| 14.21667 | 0.0298439   | 0.1170807 | -4.330354 |
| 14.23333 | 0.0298439   | 0.1215834 | -4.344211 |
| 14.25    | 0.05968781  | 0.1080706 | -4.358068 |
| 14.26667 | 0.05968781  | 0.1350872 | -4.371925 |
| 14.28333 | 0.09550049  | 0.1440972 | -4.371925 |
| 14.3     | 0.03581268  | 0.1035679 | -4.358068 |
| 14.31667 | 0.05968781  | 0.1170762 | -4.337283 |
| 14.33333 | 0.04775025  | 0.1486    | -4.344211 |
| 14.35    | 0.03581268  | 0.1305889 | -4.35114  |
| 14.36667 | 0.06565659  | 0.1305889 | -4.371925 |
| 14.38333 | 0.03581268  | 0.1305889 | -4.385783 |
| 14.4     | 0.04775025  | 0.1395945 | -4.39964  |
| 14.41667 | 0.005968781 | 0.1260862 | -4.406568 |
| 14.43333 | 0.05371903  | 0.1215834 | -4.39964  |
| 14.45    | 0.06565659  | 0.1035679 | -4.39964  |
| 14.46667 | 0.05371903  | 0.1305889 | -4.413497 |
| 14.48333 | 0.04178147  | 0.2026375 | -4.406568 |
| 14.5     | 0.04775025  | 0.15761   | -4.385783 |
| 14.51667 | 0.05968781  | 0.1666155 | -4.364997 |
| 14.53333 | 0.05371903  | 0.1260862 | -4.371925 |
| 14.55    | 0.03581268  | 0.1125734 | -4.39964  |
| 14.56667 | 0.06565659  | 0.1215789 | -4.413497 |
| 14.58333 | 0.04775025  | 0.1440972 | -4.406568 |
| 14.6     | 0.02387512  | 0.1531027 | -4.413497 |
| 14.61667 | 0.03581268  | 0.1486    | -4.427354 |
| 14.63333 | 0.03581268  | 0.1395945 | -4.434283 |
| 14.65    | 0.06565659  | 0.1260862 | -4.427354 |
| 14.66667 | 0.0298439   | 0.1305889 | -4.39964  |
| 14.68333 | 0.04775025  | 0.1486    | -4.385783 |
| 14.7     | 0.04775025  | 0.1350917 | -4.378854 |
| 14.71667 | 0.01193756  | 0.1260862 | -4.39964  |
| 14.73333 | 0.0298439   | 0.1531027 | -4.420425 |
| 14.75    | 0.04178147  | 0.1395945 | -4.441211 |
| 14.76667 | 0.01790634  | 0.1395945 | -4.44814  |

|          |            |            |           |
|----------|------------|------------|-----------|
| 14.78333 | 0.09550049 | 0.1486     | -4.434283 |
| 14.8     | 0.04775025 | 0.1621127  | -4.420425 |
| 14.81667 | 0.0298439  | 0.1711182  | -4.420425 |
| 14.83333 | 0.01193756 | 0.1395945  | -4.420425 |
| 14.85    | 0.07162537 | 0.1440972  | -4.441211 |
| 14.86667 | 0.04775025 | 0.1260862  | -4.461997 |
| 14.88333 | 0.0298439  | 0.1035724  | -4.468925 |
| 14.9     | 0.01790634 | 0.1440927  | -4.468925 |
| 14.91667 | 0.04178147 | 0.1260862  | -4.455068 |
| 14.93333 | 0.04775025 | 0.1305889  | -4.441211 |
| 14.95    | 0.05371903 | 0.1395945  | -4.44814  |
| 14.96667 | 0.05371903 | 0.1080706  | -4.475854 |
| 14.98333 | 0.02387512 | 0.1260862  | -4.503568 |
| 15       | 0.02387512 | 0.1260862  | -4.510497 |
| 15.01667 | 0.01790634 | 0.09456238 | -4.510497 |
| 15.03333 | 0.0298439  | 0.1350917  | -4.517426 |
| 15.05    | 0.04775025 | 0.1080706  | -4.503568 |
| 15.06667 | 0.0298439  | 0.1035679  | -4.482782 |
| 15.08333 | 0.02387512 | 0.1035679  | -4.489711 |
| 15.1     | 0.07162537 | 0.1215834  | -4.503568 |
| 15.11667 | 0.0298439  | 0.1486     | -4.503568 |
| 15.13333 | 0.01790634 | 0.1170762  | -4.489711 |
| 15.15    | 0.05371903 | 0.1260817  | -4.455068 |
| 15.16667 | 0.04178147 | 0.1305889  | -4.455068 |
| 15.18333 | 0.0298439  | 0.1035679  | -4.475854 |
| 15.2     | 0.05968781 | 0.1305844  | -4.489711 |
| 15.21667 | 0.03581268 | 0.08555687 | -4.503568 |
| 15.23333 | 0.04775025 | 0.1531027  | -4.503568 |
| 15.25    | 0.05371903 | 0.1260862  | -4.49664  |
| 15.26667 | 0.05371903 | 0.1350917  | -4.49664  |
| 15.28333 | 0.0298439  | 0.1440972  | -4.489711 |
| 15.3     | 0.05371903 | 0.1035679  | -4.489711 |
| 15.31667 | 0.05371903 | 0.1486     | -4.503568 |
| 15.33333 | 0.05371903 | 0.15761    | -4.524354 |
| 15.35    | 0.06565659 | 0.1305889  | -4.54514  |
| 15.36667 | 0.04178147 | 0.1395945  | -4.558997 |
| 15.38333 | 0.0298439  | 0.1260862  | -4.538211 |
| 15.4     | 0.05968781 | 0.1711137  | -4.510497 |
| 15.41667 | 0.04178147 | 0.1125779  | -4.503568 |
| 15.43333 | 0.01193756 | 0.08555687 | -4.503568 |
| 15.45    | 0.04775025 | 0.1170762  | -4.517426 |
| 15.46667 | 0.03581268 | 0.1891293  | -4.538211 |
| 15.48333 | 0.05371903 | 0.1170807  | -4.538211 |
| 15.5     | 0.03581268 | 0.1305889  | -4.510497 |
| 15.51667 | 0.0298439  | 0.1215834  | -4.482782 |
| 15.53333 | 0.04775025 | 0.1846265  | -4.489711 |
| 15.55    | 0.03581268 | 0.09456688 | -4.49664  |

|          |            |            |           |
|----------|------------|------------|-----------|
| 15.56667 | 0.02387512 | 0.1350917  | -4.510497 |
| 15.58333 | 0.05371903 | 0.1080706  | -4.524354 |
| 15.6     | 0.04178147 | 0.09906514 | -4.531282 |
| 15.61667 | 0.04775025 | 0.1260817  | -4.538211 |
| 15.63333 | 0.03581268 | 0.1711182  | -4.524354 |
| 15.65    | 0.03581268 | 0.1305889  | -4.503568 |
| 15.66667 | 0.0298439  | 0.1080706  | -4.482782 |
| 15.68333 | 0.02387512 | 0.1260817  | -4.475854 |
| 15.7     | 0.05968781 | 0.1531027  | -4.503568 |
| 15.71667 | 0.05968781 | 0.1395945  | -4.517426 |
| 15.73333 | 0.02387512 | 0.1711182  | -4.503568 |
| 15.75    | 0.06565659 | 0.1350917  | -4.49664  |
| 15.76667 | 0.04178147 | 0.1621127  | -4.503568 |
| 15.78333 | 0.07759415 | 0.1260862  | -4.510497 |
| 15.8     | 0.02387512 | 0.1260862  | -4.503568 |
| 15.81667 | 0.0298439  | 0.1531027  | -4.49664  |
| 15.83333 | 0.03581268 | 0.1260862  | -4.49664  |
| 15.85    | 0.0298439  | 0.1531027  | -4.49664  |
| 15.86667 | 0.04178147 | 0.09456238 | -4.482782 |
| 15.88333 | 0.07759415 | 0.1395945  | -4.489711 |
| 15.9     | 0.04775025 | 0.1486     | -4.49664  |
| 15.91667 | 0.03581268 | 0.1305889  | -4.49664  |
| 15.93333 | 0.02387512 | 0.1395945  | -4.482782 |
| 15.95    | 0.02387512 | 0.1125734  | -4.475854 |
| 15.96667 | 0.02387512 | 0.08105411 | -4.468925 |
| 15.98333 | 0.04178147 | 0.1260817  | -4.475854 |
| 16       | 0.03581268 | 0.1531072  | -4.49664  |
| 16.01667 | 0.0298439  | 0.1215834  | -4.517426 |
| 16.03333 | 0.04178147 | 0.1891293  | -4.538211 |
| 16.05    | 0.05968781 | 0.09005962 | -4.531282 |
| 16.06667 | 0.03581268 | 0.1350872  | -4.524354 |
| 16.08333 | 0.05968781 | 0.1215834  | -4.524354 |
| 16.1     | 0.02387512 | 0.1350917  | -4.517426 |
| 16.11667 | 0.05371903 | 0.1531027  | -4.503568 |
| 16.13333 | 0.04178147 | 0.1080706  | -4.503568 |
| 16.15    | 0.0298439  | 0.1170807  | -4.49664  |
| 16.16667 | 0.05371903 | 0.1305844  | -4.489711 |
| 16.18333 | 0.04775025 | 0.1666155  | -4.503568 |
| 16.2     | 0.04775025 | 0.1531072  | -4.510497 |
| 16.21667 | 0.07162537 | 0.1125779  | -4.489711 |
| 16.23333 | 0.0298439  | 0.1711182  | -4.489711 |
| 16.25    | 0.03581268 | 0.1305889  | -4.503568 |
| 16.26667 | 0.05371903 | 0.1440972  | -4.503568 |
| 16.28333 | 0.03581268 | 0.1486     | -4.510497 |
| 16.3     | 0.05371903 | 0.1170807  | -4.524354 |
| 16.31667 | 0.04775025 | 0.1486     | -4.531282 |
| 16.33333 | 0.05371903 | 0.1260862  | -4.552068 |

|          |             |            |           |
|----------|-------------|------------|-----------|
| 16.35    | 0.005968781 | 0.1576055  | -4.54514  |
| 16.36667 | 0.04775025  | 0.1215834  | -4.531282 |
| 16.38333 | 0.02387512  | 0.1305889  | -4.524354 |
| 16.4     | 0.05968781  | 0.15761    | -4.531282 |
| 16.41667 | 0.05371903  | 0.1395945  | -4.524354 |
| 16.43333 | 0.0298439   | 0.1305889  | -4.524354 |
| 16.45    | 0.04775025  | 0.08555687 | -4.531282 |
| 16.46667 | 0.04178147  | 0.1531027  | -4.531282 |
| 16.48333 | 0.04775025  | 0.1125779  | -4.531282 |
| 16.5     | 0.04178147  | 0.166611   | -4.538211 |
| 16.51667 | 0.0298439   | 0.1441017  | -4.531282 |
| 16.53333 | 0.05371903  | 0.1125734  | -4.503568 |
| 16.55    | 0.04178147  | 0.1260862  | -4.489711 |
| 16.56667 | 0.04178147  | 0.1395945  | -4.482782 |
| 16.58333 | 0.03581268  | 0.1305889  | -4.489711 |
| 16.6     | 0.05968781  | 0.1305889  | -4.49664  |
| 16.61667 | 0.04178147  | 0.1215834  | -4.503568 |
| 16.63333 | 0.04178147  | 0.1440972  | -4.517426 |
| 16.65    | 0.05968781  | 0.1711182  | -4.503568 |
| 16.66667 | 0.06565659  | 0.1531027  | -4.49664  |
| 16.68333 | 0.03581268  | 0.1441017  | -4.489711 |
| 16.7     | 0.05371903  | 0.15761    | -4.482782 |
| 16.71667 | 0.04775025  | 0.1350917  | -4.475854 |
| 16.73333 | 0.04178147  | 0.09906514 | -4.468925 |
| 16.75    | 0.02387512  | 0.08105411 | -4.475854 |
| 16.76667 | 0.04178147  | 0.1440972  | -4.489711 |
| 16.78333 | 0.03581268  | 0.1395945  | -4.503568 |
| 16.8     | 0.0298439   | 0.09005962 | -4.503568 |
| 16.81667 | 0.08356293  | 0.1350872  | -4.489711 |
| 16.83333 | 0.03581268  | 0.166611   | -4.468925 |
| 16.85    | 0.01790634  | 0.1350962  | -4.461997 |
| 16.86667 | 0.05968781  | 0.1486     | -4.489711 |
| 16.88333 | 0.05968781  | 0.1170807  | -4.517426 |
| 16.9     | 0.04775025  | 0.1305844  | -4.517426 |
| 16.91667 | 0.03581268  | 0.1350917  | -4.524354 |
| 16.93333 | 0.05968781  | 0.1305889  | -4.503568 |
| 16.95    | 0.04775025  | 0.1035679  | -4.49664  |
| 16.96667 | 0.03581268  | 0.1486     | -4.482782 |
| 16.98333 | 0.05968781  | 0.1531027  | -4.455068 |
| 17       | 0.05968781  | 0.15761    | -4.44814  |
| 17.01667 | 0.03581268  | 0.1260862  | -4.461997 |
| 17.03333 | 0.04178147  | 0.09906514 | -4.468925 |
| 17.05    | 0.02387512  | 0.1440972  | -4.461997 |
| 17.06667 | 0.04178147  | 0.1260862  | -4.455068 |
| 17.08333 | 0.05371903  | 0.1305889  | -4.475854 |
| 17.1     | 0.05371903  | 0.1531027  | -4.489711 |
| 17.11667 | 0.01790634  | 0.1215834  | -4.468925 |

|          |             |            |           |
|----------|-------------|------------|-----------|
| 17.13333 | 0.005968781 | 0.1531027  | -4.455068 |
| 17.15    | 0.03581268  | 0.1125734  | -4.455068 |
| 17.16667 | 0.04775025  | 0.13959    | -4.468925 |
| 17.18333 | 0.0298439   | 0.1260862  | -4.475854 |
| 17.2     | 0.04178147  | 0.1080706  | -4.461997 |
| 17.21667 | 0.05371903  | 0.1395945  | -4.461997 |
| 17.23333 | 0.0298439   | 0.09005962 | -4.468925 |
| 17.25    | 0.05371903  | 0.1305844  | -4.455068 |
| 17.26667 | 0.06565659  | 0.1621127  | -4.441211 |
| 17.28333 | 0.05371903  | 0.1395945  | -4.441211 |
| 17.3     | 0.05968781  | 0.1125734  | -4.455068 |
| 17.31667 | 0.08356293  | 0.1486     | -4.461997 |
| 17.33333 | 0.04178147  | 0.1125734  | -4.461997 |
| 17.35    | 0.0298439   | 0.1350917  | -4.468925 |
| 17.36667 | 0.04178147  | 0.1621082  | -4.455068 |
| 17.38333 | 0.05371903  | 0.1035679  | -4.427354 |
| 17.4     | 0.03581268  | 0.1395945  | -4.420425 |
| 17.41667 | 0.05371903  | 0.1711182  | -4.427354 |
| 17.43333 | 0.04775025  | 0.1215834  | -4.441211 |
| 17.45    | 0.04775025  | 0.1305889  | -4.420425 |
| 17.46667 | 0.06565659  | 0.1305889  | -4.392711 |
| 17.48333 | 0.05968781  | 0.1440972  | -4.39964  |
| 17.5     | 0.04775025  | 0.1440972  | -4.420425 |
| 17.51667 | 0.0298439   | 0.1486     | -4.427354 |
| 17.53333 | 0.02387512  | 0.1215834  | -4.434283 |
| 17.55    | 0.04775025  | 0.1260862  | -4.468925 |
| 17.56667 | 0.0298439   | 0.1125734  | -4.475854 |
| 17.58333 | 0.01790634  | 0.1170762  | -4.461997 |
| 17.6     | 0.0298439   | 0.1215789  | -4.461997 |
| 17.61667 | 0.07162537  | 0.1035679  | -4.434283 |
| 17.63333 | 0.04178147  | 0.1035679  | -4.39964  |
| 17.65    | 0.04775025  | 0.1260862  | -4.39964  |
| 17.66667 | 0.0298439   | 0.1215789  | -4.413497 |
| 17.68333 | 0.04178147  | 0.166611   | -4.427354 |
| 17.7     | 0.01790634  | 0.1125779  | -4.441211 |
| 17.71667 | 0.06565659  | 0.1350917  | -4.455068 |
| 17.73333 | 0.07759415  | 0.1305889  | -4.455068 |
| 17.75    | 0.01193756  | 0.1350917  | -4.44814  |
| 17.76667 | 0.05371903  | 0.1486     | -4.455068 |
| 17.78333 | 0.05968781  | 0.1260862  | -4.441211 |
| 17.8     | 0.03581268  | 0.1350917  | -4.427354 |
| 17.81667 | 0.06565659  | 0.1666155  | -4.427354 |
| 17.83333 | 0.04775025  | 0.1440972  | -4.427354 |
| 17.85    | 0.02387512  | 0.1621082  | -4.441211 |
| 17.86667 | 0.07759415  | 0.1080751  | -4.441211 |
| 17.88333 | 0.04178147  | 0.1576055  | -4.434283 |
| 17.9     | 0.05968781  | 0.1350917  | -4.427354 |

|          |             |            |           |
|----------|-------------|------------|-----------|
| 17.91667 | 0.05371903  | 0.1170762  | -4.420425 |
| 17.93333 | 0.05371903  | 0.1035679  | -4.413497 |
| 17.95    | 0.02387512  | 0.1305889  | -4.427354 |
| 17.96667 | 0.05968781  | 0.1035679  | -4.461997 |
| 17.98333 | 0.02387512  | 0.1801192  | -4.468925 |
| 18       | 0.0298439   | 0.1486045  | -4.461997 |
| 18.01667 | 0.03581268  | 0.1125734  | -4.475854 |
| 18.03333 | 0.05968781  | 0.1215789  | -4.475854 |
| 18.05    | 0.03581268  | 0.1305889  | -4.461997 |
| 18.06667 | 0.02387512  | 0.1170807  | -4.461997 |
| 18.08333 | 0.005968781 | 0.1440972  | -4.455068 |
| 18.1     | 0.02387512  | 0.1486045  | -4.44814  |
| 18.11667 | 0.05968781  | 0.1215834  | -4.427354 |
| 18.13333 | 0.0298439   | 0.1080706  | -4.413497 |
| 18.15    | 0.0298439   | 0.1125734  | -4.413497 |
| 18.16667 | 0.05968781  | 0.1395945  | -4.420425 |
| 18.18333 | 0.03581268  | 0.1666155  | -4.420425 |
| 18.2     | 0.06565659  | 0.1666155  | -4.427354 |
| 18.21667 | 0.05371903  | 0.1395945  | -4.434283 |
| 18.23333 | 0.04775025  | 0.1350917  | -4.434283 |
| 18.25    | 0.05968781  | 0.09456238 | -4.420425 |
| 18.26667 | 0.01790634  | 0.166611   | -4.420425 |
| 18.28333 | 0.07162537  | 0.08105411 | -4.434283 |
| 18.3     | 0.0298439   | 0.1485955  | -4.434283 |
| 18.31667 | 0.04775025  | 0.1170807  | -4.427354 |
| 18.33333 | 0.08953171  | 0.1260817  | -4.427354 |
| 18.35    | 0.04775025  | 0.1486     | -4.413497 |
| 18.36667 | 0.03581268  | 0.15761    | -4.385783 |
| 18.38333 | 0.04178147  | 0.1395945  | -4.39964  |
| 18.4     | 0.05968781  | 0.15761    | -4.427354 |
| 18.41667 | 0.05371903  | 0.1215834  | -4.427354 |
| 18.43333 | 0.03581268  | 0.1350917  | -4.434283 |
| 18.45    | 0.05371903  | 0.1801238  | -4.441211 |
| 18.46667 | 0.06565659  | 0.15761    | -4.44814  |
| 18.48333 | 0.01790634  | 0.1080751  | -4.475854 |
| 18.5     | 0.02387512  | 0.1305889  | -4.468925 |
| 18.51667 | 0.05968781  | 0.1170807  | -4.455068 |
| 18.53333 | 0.01790634  | 0.1395945  | -4.455068 |
| 18.55    | 0.0298439   | 0.09456238 | -4.44814  |
| 18.56667 | 0.05371903  | 0.1260817  | -4.455068 |
| 18.58333 | 0.0298439   | 0.1440972  | -4.455068 |
| 18.6     | 0.04178147  | 0.1215834  | -4.461997 |
| 18.61667 | 0.04775025  | 0.1170807  | -4.482782 |
| 18.63333 | 0.04775025  | 0.1215789  | -4.475854 |
| 18.65    | 0.05371903  | 0.1576055  | -4.455068 |
| 18.66667 | 0.02387512  | 0.1936365  | -4.441211 |
| 18.68333 | 0.07162537  | 0.1711182  | -4.441211 |



|          |             |            |           |
|----------|-------------|------------|-----------|
| 18.7     | 0.05371903  | 0.1395945  | -4.427354 |
| 18.71667 | 0.04775025  | 0.1350917  | -4.413497 |
| 18.73333 | 0.05371903  | 0.1440972  | -4.413497 |
| 18.75    | 0.04178147  | 0.1305889  | -4.434283 |
| 18.76667 | 0.07759415  | 0.1170762  | -4.44814  |
| 18.78333 | 0.02387512  | 0.1125779  | -4.461997 |
| 18.8     | 0.03581268  | 0.166611   | -4.475854 |
| 18.81667 | 0.02387512  | 0.1531027  | -4.482782 |
| 18.83333 | 0.04178147  | 0.1395945  | -4.475854 |
| 18.85    | 0.0298439   | 0.09456238 | -4.475854 |
| 18.86667 | 0.04178147  | 0.1576055  | -4.49664  |
| 18.88333 | 0.02387512  | 0.1170807  | -4.482782 |
| 18.9     | 0.06565659  | 0.1170762  | -4.475854 |
| 18.91667 | 0.05371903  | 0.1170762  | -4.468925 |
| 18.93333 | 0.02387512  | 0.1170762  | -4.461997 |
| 18.95    | 0.03581268  | 0.1621127  | -4.455068 |
| 18.96667 | 0.0298439   | 0.1395945  | -4.461997 |
| 18.98333 | 0.005968781 | 0.1170807  | -4.468925 |
| 19       | 0.05371903  | 0.1260862  | -4.468925 |
| 19.01667 | 0.02387512  | 0.1440972  | -4.461997 |
| 19.03333 | 0.08356293  | 0.1035679  | -4.475854 |
| 19.05    | 0.02387512  | 0.08105411 | -4.49664  |
| 19.06667 | 0.05968781  | 0.1035679  | -4.524354 |
| 19.08333 | 0.04178147  | 0.1350917  | -4.531282 |
| 19.1     | 0.04178147  | 0.1756165  | -4.517426 |
| 19.11667 | 0.05968781  | 0.1305889  | -4.531282 |
| 19.13333 | 0.08356293  | 0.1711182  | -4.565925 |
| 19.15    | 0.07162537  | 0.1260862  | -4.572854 |
| 19.16667 | 0.04775025  | 0.1621082  | -4.552068 |
| 19.18333 | 0.07759415  | 0.1350917  | -4.54514  |
| 19.2     | 0.02387512  | 0.1035679  | -4.558997 |
| 19.21667 | 0.02387512  | 0.1981348  | -4.565925 |
| 19.23333 | 0.02387512  | 0.1531072  | -4.565925 |
| 19.25    | 0.05968781  | 0.1801238  | -4.558997 |
| 19.26667 | 0.04178147  | 0.1395945  | -4.54514  |
| 19.28333 | 0.08356293  | 0.09456238 | -4.531282 |
| 19.3     | 0.04775025  | 0.1305844  | -4.538211 |
| 19.31667 | 0.0298439   | 0.1440972  | -4.54514  |
| 19.33333 | 0.02387512  | 0.1080751  | -4.531282 |
| 19.35    | 0.0298439   | 0.1441017  | -4.524354 |
| 19.36667 | 0.05371903  | 0.1395945  | -4.538211 |
| 19.38333 | 0.05968781  | 0.09906514 | -4.565925 |
| 19.4     | 0.04775025  | 0.1305889  | -4.572854 |
| 19.41667 | 0.04775025  | 0.1305844  | -4.565925 |
| 19.43333 | 0.03581268  | 0.1486     | -4.572854 |
| 19.45    | 0.07162537  | 0.1711182  | -4.572854 |
| 19.46667 | 0.08953171  | 0.1486045  | -4.579782 |

|          |            |            |           |
|----------|------------|------------|-----------|
| 19.48333 | 0.07759415 | 0.1080706  | -4.579782 |
| 19.5     | 0.06565659 | 0.1486045  | -4.586711 |
| 19.51667 | 0.05371903 | 0.1486     | -4.614425 |
| 19.53333 | 0.04775025 | 0.1260862  | -4.621354 |
| 19.55    | 0.05968781 | 0.1215834  | -4.600568 |
| 19.56667 | 0.0298439  | 0.1576055  | -4.593639 |
| 19.58333 | 0.05968781 | 0.1666155  | -4.607497 |
| 19.6     | 0.05371903 | 0.1666155  | -4.621354 |
| 19.61667 | 0.07162537 | 0.1531027  | -4.635211 |
| 19.63333 | 0.02387512 | 0.1801238  | -4.635211 |
| 19.65    | 0.08356293 | 0.1621127  | -4.635211 |
| 19.66667 | 0.02387512 | 0.1215834  | -4.655997 |
| 19.68333 | 0.07162537 | 0.1395945  | -4.676783 |
| 19.7     | 0.07162537 | 0.1891293  | -4.649068 |
| 19.71667 | 0.06565659 | 0.1440972  | -4.635211 |
| 19.73333 | 0.02387512 | 0.1711137  | -4.649068 |
| 19.75    | 0.05371903 | 0.1215834  | -4.662925 |
| 19.76667 | 0.01790634 | 0.1486     | -4.649068 |
| 19.78333 | 0.03581268 | 0.1170762  | -4.642139 |
| 19.8     | 0.03581268 | 0.1260862  | -4.655997 |
| 19.81667 | 0.06565659 | 0.1350917  | -4.676783 |
| 19.83333 | 0.05371903 | 0.1531027  | -4.697568 |
| 19.85    | 0.07759415 | 0.15761    | -4.704497 |
| 19.86667 | 0.07759415 | 0.1801238  | -4.704497 |
| 19.88333 | 0.07759415 | 0.1531072  | -4.711425 |
| 19.9     | 0.07162537 | 0.09906514 | -4.73914  |
| 19.91667 | 0.07162537 | 0.1395945  | -4.759925 |
| 19.93333 | 0.03581268 | 0.1170762  | -4.752996 |
| 19.95    | 0.07162537 | 0.1440972  | -4.725282 |
| 19.96667 | 0.08356293 | 0.1576055  | -4.725282 |
| 19.98333 | 0.05968781 | 0.1666155  | -4.766854 |
| 20       | 0.03581268 | 0.15761    | -4.78764  |
| 20.01667 | 0.05371903 | 0.1621127  | -4.808425 |
| 20.03333 | 0.03581268 | 0.1531027  | -4.836139 |
| 20.05    | 0.05371903 | 0.1170807  | -4.843068 |
| 20.06667 | 0.04775025 | 0.1576055  | -4.836139 |
| 20.08333 | 0.0298439  | 0.1170807  | -4.843068 |
| 20.1     | 0.08953171 | 0.1305889  | -4.863853 |
| 20.11667 | 0.0298439  | 0.1305889  | -4.870782 |
| 20.13333 | 0.05968781 | 0.1395945  | -4.849997 |
| 20.15    | 0.03581268 | 0.1260862  | -4.829211 |
| 20.16667 | 0.05371903 | 0.1395945  | -4.843068 |
| 20.18333 | 0.08953171 | 0.1846265  | -4.884639 |
| 20.2     | 0.04178147 | 0.1350962  | -4.905425 |
| 20.21667 | 0.07162537 | 0.1395945  | -4.912354 |
| 20.23333 | 0.06565659 | 0.1035679  | -4.905425 |
| 20.25    | 0.04775025 | 0.1711137  | -4.898497 |

|          |            |            |           |
|----------|------------|------------|-----------|
| 20.26667 | 0.04178147 | 0.1531072  | -4.898497 |
| 20.28333 | 0.0298439  | 0.15761    | -4.912354 |
| 20.3     | 0.05371903 | 0.1440972  | -4.933139 |
| 20.31667 | 0.04178147 | 0.15761    | -4.946997 |
| 20.33333 | 0.05371903 | 0.1350917  | -4.953925 |
| 20.35    | 0.05371903 | 0.166611   | -4.953925 |
| 20.36667 | 0.06565659 | 0.1486045  | -4.960854 |
| 20.38333 | 0.0298439  | 0.1170807  | -4.988568 |
| 20.4     | 0.05968781 | 0.166611   | -5.016282 |
| 20.41667 | 0.01193756 | 0.1441017  | -5.030139 |
| 20.43333 | 0.07162537 | 0.1756165  | -5.037068 |
| 20.45    | 0.04775025 | 0.1440972  | -5.030139 |
| 20.46667 | 0.03581268 | 0.1486     | -5.023211 |
| 20.48333 | 0.02387512 | 0.1486045  | -5.030139 |
| 20.5     | 0.04775025 | 0.1621082  | -5.050925 |
| 20.51667 | 0.04178147 | 0.1531072  | -5.050925 |
| 20.53333 | 0.07162537 | 0.1215834  | -5.043996 |
| 20.55    | 0.03581268 | 0.1305844  | -5.043996 |
| 20.56667 | 0.07759415 | 0.1170807  | -5.071711 |
| 20.58333 | 0.03581268 | 0.166611   | -5.106353 |
| 20.6     | 0.01790634 | 0.1666155  | -5.113282 |
| 20.61667 | 0.03581268 | 0.1486     | -5.113282 |
| 20.63333 | 0.04775025 | 0.175621   | -5.113282 |
| 20.65    | 0.0298439  | 0.1440972  | -5.099425 |
| 20.66667 | 0.01790634 | 0.184631   | -5.106353 |
| 20.68333 | 0.04775025 | 0.1486     | -5.140996 |
| 20.7     | 0.0298439  | 0.1350917  | -5.175639 |
| 20.71667 | 0.03581268 | 0.1305889  | -5.189497 |
| 20.73333 | 0.08356293 | 0.1170807  | -5.217211 |
| 20.75    | 0.04775025 | 0.1035679  | -5.237996 |
| 20.76667 | 0.08356293 | 0.1711137  | -5.224139 |
| 20.78333 | 0.02387512 | 0.1170807  | -5.196425 |
| 20.8     | 0.07162537 | 0.1260817  | -5.182568 |
| 20.81667 | 0.0298439  | 0.09456238 | -5.196425 |
| 20.83333 | 0.05371903 | 0.1711137  | -5.217211 |
| 20.85    | 0.04178147 | 0.1441017  | -5.224139 |
| 20.86667 | 0.05371903 | 0.1350917  | -5.224139 |
| 20.88333 | 0.02387512 | 0.1711182  | -5.244925 |
| 20.9     | 0.0298439  | 0.1531072  | -5.272639 |
| 20.91667 | 0.08356293 | 0.1486     | -5.293425 |
| 20.93333 | 0.07162537 | 0.1846265  | -5.300354 |
| 20.95    | 0.04178147 | 0.1666155  | -5.300354 |
| 20.96667 | 0.04178147 | 0.1441017  | -5.300354 |
| 20.98333 | 0.07162537 | 0.1891293  | -5.321139 |
| 21       | 0.05371903 | 0.1981348  | -5.341925 |
| 21.01667 | 0.0298439  | 0.1441017  | -5.348853 |
| 21.03333 | 0.05968781 | 0.15761    | -5.355782 |

|          |             |            |           |
|----------|-------------|------------|-----------|
| 21.05    | 0.05371903  | 0.1576055  | -5.36271  |
| 21.06667 | 0.0298439   | 0.1350917  | -5.376567 |
| 21.08333 | 0.05371903  | 0.15761    | -5.369639 |
| 21.1     | 0.04775025  | 0.193632   | -5.369639 |
| 21.11667 | 0.07162537  | 0.1260862  | -5.397353 |
| 21.13333 | 0.04178147  | 0.1395945  | -5.431996 |
| 21.15    | 0.06565659  | 0.1486     | -5.445853 |
| 21.16667 | 0.03581268  | 0.1350917  | -5.459711 |
| 21.18333 | 0.07759415  | 0.1395945  | -5.473567 |
| 21.2     | 0.07759415  | 0.1170762  | -5.487425 |
| 21.21667 | 0.06565659  | 0.1305889  | -5.515139 |
| 21.23333 | 0.05371903  | 0.1891293  | -5.535924 |
| 21.25    | 0.04775025  | 0.09906514 | -5.549782 |
| 21.26667 | 0.05371903  | 0.1215789  | -5.570568 |
| 21.28333 | 0.04775025  | 0.1576055  | -5.584424 |
| 21.3     | 0.05371903  | 0.1170807  | -5.60521  |
| 21.31667 | 0.01193756  | 0.1170762  | -5.60521  |
| 21.33333 | 0.07162537  | 0.184622   | -5.612139 |
| 21.35    | 0.05968781  | 0.15761    | -5.639853 |
| 21.36667 | 0.01193756  | 0.1531027  | -5.674496 |
| 21.38333 | 0.05968781  | 0.1486     | -5.660639 |
| 21.4     | 0.05968781  | 0.175621   | -5.646781 |
| 21.41667 | 0.05371903  | 0.175621   | -5.674496 |
| 21.43333 | 0.04178147  | 0.1305889  | -5.681425 |
| 21.45    | 0.07162537  | 0.1531027  | -5.688353 |
| 21.46667 | 0.01790634  | 0.1395945  | -5.722996 |
| 21.48333 | 0.03581268  | 0.166611   | -5.75071  |
| 21.5     | 0.03581268  | 0.2026375  | -5.757639 |
| 21.51667 | 0.0298439   | 0.1350962  | -5.757639 |
| 21.53333 | 0.06565659  | 0.1080706  | -5.771496 |
| 21.55    | 0.04775025  | 0.1395945  | -5.792282 |
| 21.56667 | 0.05371903  | 0.1486     | -5.79921  |
| 21.58333 | 0.03581268  | 0.1395945  | -5.806139 |
| 21.6     | 0.03581268  | 0.1305889  | -5.826924 |
| 21.61667 | 0.05371903  | 0.1440972  | -5.84771  |
| 21.63333 | 0.05968781  | 0.1576055  | -5.861567 |
| 21.65    | 0.04775025  | 0.1621127  | -5.868496 |
| 21.66667 | 0.05968781  | 0.1891293  | -5.875424 |
| 21.68333 | 0.03581268  | 0.15761    | -5.875424 |
| 21.7     | 0.03581268  | 0.1170807  | -5.889281 |
| 21.71667 | 0.05968781  | 0.1486     | -5.903139 |
| 21.73333 | 0.05968781  | 0.1350917  | -5.916996 |
| 21.75    | 0.05968781  | 0.1756165  | -5.965496 |
| 21.76667 | 0.04178147  | 0.1260862  | -6.027853 |
| 21.78333 | 0.005968781 | 0.1801192  | -6.062496 |
| 21.8     | 0.04775025  | 0.1350917  | -6.069424 |
| 21.81667 | 0.04178147  | 0.1576055  | -6.076353 |

|          |            |            |           |
|----------|------------|------------|-----------|
| 21.83333 | 0.04775025 | 0.1125779  | -6.09021  |
| 21.85    | 0.04775025 | 0.1486     | -6.117924 |
| 21.86667 | 0.02387512 | 0.1711137  | -6.13871  |
| 21.88333 | 0.06565659 | 0.1531072  | -6.152567 |
| 21.9     | 0.05371903 | 0.1305889  | -6.18721  |
| 21.91667 | 0.04775025 | 0.1621082  | -6.207995 |
| 21.93333 | 0.05371903 | 0.1531072  | -6.214924 |
| 21.95    | 0.01193756 | 0.1260862  | -6.207995 |
| 21.96667 | 0.06565659 | 0.1305889  | -6.207995 |
| 21.98333 | 0.05371903 | 0.1350917  | -6.23571  |
| 22       | 0.01790634 | 0.09456238 | -6.263424 |
| 22.01667 | 0.06565659 | 0.211643   | -6.270353 |
| 22.03333 | 0.04178147 | 0.1305889  | -6.28421  |
| 22.05    | 0.01790634 | 0.1215834  | -6.318852 |
| 22.06667 | 0.06565659 | 0.1440972  | -6.346567 |
| 22.08333 | 0.02387512 | 0.1260862  | -6.346567 |
| 22.1     | 0.0298439  | 0.1440972  | -6.346567 |
| 22.11667 | 0.03581268 | 0.1621082  | -6.367352 |
| 22.13333 | 0.04775025 | 0.1125734  | -6.395067 |
| 22.15    | 0.02387512 | 0.1486     | -6.415853 |
| 22.16667 | 0.04775025 | 0.1215834  | -6.436638 |
| 22.18333 | 0.04775025 | 0.1756165  | -6.464353 |
| 22.2     | 0.06565659 | 0.1215834  | -6.492067 |
| 22.21667 | 0.03581268 | 0.1260862  | -6.505924 |
| 22.23333 | 0.0298439  | 0.1801238  | -6.52671  |
| 22.25    | 0.03581268 | 0.1486     | -6.554424 |
| 22.26667 | 0.01790634 | 0.1305889  | -6.57521  |
| 22.28333 | 0.0298439  | 0.09005962 | -6.582138 |
| 22.3     | 0.05371903 | 0.1395945  | -6.589067 |
| 22.31667 | 0.04178147 | 0.1080751  | -6.616781 |
| 22.33333 | 0.03581268 | 0.1801192  | -6.651424 |
| 22.35    | 0.08356293 | 0.15761    | -6.67221  |
| 22.36667 | 0.07162537 | 0.1666155  | -6.679138 |
| 22.38333 | 0.01790634 | 0.1486     | -6.686067 |
| 22.4     | 0.02387512 | 0.1080751  | -6.699924 |
| 22.41667 | 0.03581268 | 0.1260862  | -6.720709 |
| 22.43333 | 0.06565659 | 0.1350917  | -6.741495 |
| 22.45    | 0.04178147 | 0.1350917  | -6.769209 |
| 22.46667 | 0.05371903 | 0.1350917  | -6.783067 |
| 22.48333 | 0.01790634 | 0.1350917  | -6.776138 |
| 22.5     | 0.06565659 | 0.1305889  | -6.762281 |
| 22.51667 | 0.05371903 | 0.1170762  | -6.762281 |
| 22.53333 | 0.03581268 | 0.1711137  | -6.796924 |
| 22.55    | 0.05968781 | 0.1305889  | -6.838495 |
| 22.56667 | 0.04178147 | 0.09906514 | -6.86621  |
| 22.58333 | 0.05968781 | 0.1486     | -6.86621  |
| 22.6     | 0.04178147 | 0.1395945  | -6.852352 |

|          |            |            |           |
|----------|------------|------------|-----------|
| 22.61667 | 0.03581268 | 0.1440972  | -6.852352 |
| 22.63333 | 0.05968781 | 0.1576055  | -6.880066 |
| 22.65    | 0.01790634 | 0.1711182  | -6.900852 |
| 22.66667 | 0.04775025 | 0.1441017  | -6.907781 |
| 22.68333 | 0.05968781 | 0.1666155  | -6.893924 |
| 22.7     | 0.07162537 | 0.1260862  | -6.900852 |
| 22.71667 | 0.04775025 | 0.09906514 | -6.921638 |
| 22.73333 | 0.0298439  | 0.1260817  | -6.928566 |
| 22.75    | 0.04775025 | 0.09456238 | -6.928566 |
| 22.76667 | 0.0298439  | 0.1125734  | -6.935495 |
| 22.78333 | 0.03581268 | 0.1621082  | -6.942424 |
| 22.8     | 0.0298439  | 0.1711182  | -6.949352 |
| 22.81667 | 0.04775025 | 0.1260862  | -6.949352 |
| 22.83333 | 0.03581268 | 0.09906514 | -6.935495 |
| 22.85    | 0.05968781 | 0.09456238 | -6.928566 |
| 22.86667 | 0.02387512 | 0.09005962 | -6.942424 |
| 22.88333 | 0.02387512 | 0.09456238 | -6.942424 |
| 22.9     | 0.04178147 | 0.1531027  | -6.935495 |
| 22.91667 | 0.03581268 | 0.1486045  | -6.921638 |
| 22.93333 | 0.04178147 | 0.1260862  | -6.880066 |
| 22.95    | 0.02387512 | 0.1080706  | -6.831566 |
| 22.96667 | 0.03581268 | 0.1260862  | -6.810781 |
| 22.98333 | 0.06565659 | 0.1305889  | -6.796924 |
| 23       | 0.05968781 | 0.09005962 | -6.776138 |
| 23.01667 | 0.0298439  | 0.1531027  | -6.741495 |
| 23.03333 | 0.04178147 | 0.08555687 | -6.706852 |
| 23.05    | 0.05371903 | 0.13959    | -6.658352 |
| 23.06667 | 0.05968781 | 0.15761    | -6.602924 |
| 23.08333 | 0.04775025 | 0.1125734  | -6.547495 |
| 23.1     | 0.01790634 | 0.1486     | -6.492067 |
| 23.11667 | 0.04178147 | 0.1711182  | -6.408924 |
| 23.13333 | 0.05371903 | 0.1035724  | -6.304996 |
| 23.15    | 0.04775025 | 0.1305889  | -6.18721  |
| 23.16667 | 0.0298439  | 0.1440972  | -6.048638 |
| 23.18333 | 0.04178147 | 0.1260862  | -5.910067 |
| 23.2     | 0.08356293 | 0.1260862  | -5.771496 |
| 23.21667 | 0.07162537 | 0.1801238  | -5.60521  |
| 23.23333 | 0.07162537 | 0.1395945  | -5.431996 |
| 23.25    | 0.05371903 | 0.1486     | -5.244925 |
| 23.26667 | 0.04178147 | 0.1305889  | -5.030139 |
| 23.28333 | 0.05968781 | 0.07655136 | -4.801497 |
| 23.3     | 0.03581268 | 0.09456238 | -4.54514  |
| 23.31667 | 0.0298439  | 0.1350917  | -4.274926 |
| 23.33333 | 0.04178147 | 0.1080706  | -4.004712 |
| 23.35    | 0.03581268 | 0.09005962 | -3.727569 |
| 23.36667 | 0.05371903 | 0.1486     | -3.415783 |
| 23.38333 | 0.04775025 | 0.1666155  | -3.069355 |

|          |            |            |            |
|----------|------------|------------|------------|
| 23.4     | 0.04178147 | 0.1486045  | -2.688284  |
| 23.41667 | 0.08356293 | 0.1305889  | -2.286427  |
| 23.43333 | 0.05371903 | 0.1305889  | -1.870713  |
| 23.45    | 0.06565659 | 0.09906514 | -1.427285  |
| 23.46667 | 0.07759415 | 0.1576055  | -0.9561422 |
| 23.48333 | 0.08356293 | 0.1486     | -0.464214  |
| 23.5     | 0.05371903 | 0.1711182  | 0.04849996 |
| 23.51667 | 0.05968781 | 0.1350917  | 0.6027853  |
| 23.53333 | 0.05371903 | 0.193632   | 1.191713   |
| 23.55    | 0.05968781 | 0.1395945  | 1.815284   |
| 23.56667 | 0.04775025 | 0.1531027  | 2.487355   |
| 23.58333 | 0.05371903 | 0.1080751  | 3.180212   |
| 23.6     | 0.07162537 | 0.1711182  | 3.900783   |
| 23.61667 | 0.08356293 | 0.1260862  | 4.649068   |
| 23.63333 | 0.06565659 | 0.1305844  | 5.425067   |
| 23.65    | 0.04775025 | 0.09456238 | 6.228781   |
| 23.66667 | 0.08953171 | 0.1260817  | 7.074066   |
| 23.68333 | 0.1014752  | 0.1395945  | 7.947066   |
| 23.7     | 0.05968781 | 0.1170762  | 8.854708   |
| 23.71667 | 0.107444   | 0.1440972  | 9.783135   |
| 23.73333 | 0.07759415 | 0.1350917  | 10.72542   |
| 23.75    | 0.1372879  | 0.1170807  | 11.71621   |
| 23.76667 | 0.07163134 | 0.1350917  | 12.77628   |
| 23.78333 | 0.1551943  | 0.1486     | 13.87792   |
| 23.8     | 0.1134128  | 0.1621127  | 14.98649   |
| 23.81667 | 0.1850382  | 0.1215834  | 16.12277   |
| 23.83333 | 0.1372939  | 0.1215834  | 17.31449   |
| 23.85    | 0.1790754  | 0.1305889  | 18.54084   |
| 23.86667 | 0.1372879  | 0.1621082  | 19.80184   |
| 23.88333 | 0.1372879  | 0.1531027  | 21.09748   |
| 23.9     | 0.1850382  | 0.1170807  | 22.42084   |
| 23.91667 | 0.268619   | 0.1215834  | 23.77191   |
| 23.93333 | 0.2089252  | 0.1486     | 25.15763   |
| 23.95    | 0.1850441  | 0.1260862  | 26.56412   |
| 23.96667 | 0.3402444  | 0.1035679  | 27.99834   |
| 23.98333 | 0.3641374  | 0.1711137  | 29.48105   |
| 24       | 0.2566874  | 0.15761    | 30.99841   |
| 24.01667 | 0.3342816  | 0.1305889  | 32.52962   |
| 24.03333 | 0.2925001  | 0.1350917  | 34.06083   |
| 24.05    | 0.4596499  | 0.1486     | 35.63362   |
| 24.06667 | 0.3342995  | 0.1801238  | 37.24104   |
| 24.08333 | 0.4477063  | 0.1260862  | 38.8554    |
| 24.1     | 0.5372679  | 0.1531027  | 40.49747   |
| 24.11667 | 0.5552101  | 0.1440972  | 42.16033   |
| 24.13333 | 0.5432605  | 0.1621082  | 43.83011   |
| 24.15    | 0.6029543  | 0.09906964 | 45.51375   |
| 24.16667 | 0.5193914  | 0.13959    | 47.21818   |

|          |           |            |          |
|----------|-----------|------------|----------|
| 24.18333 | 0.8357905 | 0.1395945  | 48.95032 |
| 24.2     | 0.7104878 | 0.1125734  | 50.70325 |
| 24.21667 | 0.7403079 | 0.1125734  | 52.4631  |
| 24.23333 | 0.9134503 | 0.07655136 | 54.21603 |
| 24.25    | 0.9911399 | 0.1350872  | 55.96896 |
| 24.26667 | 0.961302  | 0.1080751  | 57.72189 |
| 24.28333 | 1.09862   | 0.1125734  | 59.48867 |
| 24.3     | 1.212116  | 0.1395945  | 61.26239 |
| 24.31667 | 1.104672  | 0.1350917  | 62.98067 |
| 24.33333 | 1.295751  | 0.1170807  | 64.65738 |
| 24.35    | 1.355492  | 0.1531027  | 66.35488 |
| 24.36667 | 1.355546  | 0.1260862  | 68.08009 |
| 24.38333 | 1.660085  | 0.1395945  | 69.79838 |
| 24.4     | 1.666275  | 0.1170762  | 71.48895 |
| 24.41667 | 1.827462  | 0.1576055  | 73.12409 |
| 24.43333 | 1.923153  | 0.1305889  | 74.69688 |
| 24.45    | 1.94707   | 0.1215834  | 76.24887 |
| 24.46667 | 1.965012  | 0.1125734  | 77.80087 |
| 24.48333 | 2.22192   | 0.1440972  | 79.33901 |
| 24.5     | 2.263726  | 0.1170807  | 80.80787 |
| 24.51667 | 2.407251  | 0.1260817  | 82.24902 |
| 24.53333 | 2.724032  | 0.1350917  | 83.66244 |
| 24.55    | 2.802008  | 0.1531027  | 84.99966 |
| 24.56667 | 3.088784  | 0.1170807  | 86.27451 |
| 24.58333 | 3.095016  | 0.1260862  | 87.48701 |
| 24.6     | 3.417855  | 0.1621127  | 88.67179 |
| 24.61667 | 3.537529  | 0.1170762  | 89.82887 |
| 24.63333 | 3.758905  | 0.1125734  | 90.9305  |
| 24.65    | 4.052062  | 0.1531027  | 91.98365 |
| 24.66667 | 4.130008  | 0.15761    | 92.96751 |
| 24.68333 | 4.596558  | 0.1440972  | 93.88901 |
| 24.7     | 4.47159   | 0.1260862  | 94.72736 |
| 24.71667 | 5.14103   | 0.1621082  | 95.48257 |
| 24.73333 | 5.3274    | 0.1215834  | 96.1685  |
| 24.75    | 5.537268  | 0.1395945  | 96.81979 |
| 24.76667 | 5.369963  | 0.1395945  | 97.40871 |
| 24.78333 | 5.979733  | 0.1711182  | 97.92143 |
| 24.8     | 6.070382  | 0.1441017  | 98.37179 |
| 24.81667 | 6.453816  | 0.1170762  | 98.77364 |
| 24.83333 | 6.927158  | 0.1170762  | 99.14086 |
| 24.85    | 7.203095  | 0.1531027  | 99.45264 |
| 24.86667 | 7.760585  | 0.1486045  | 99.68822 |
| 24.88333 | 8.060905  | 0.1035679  | 99.8545  |
| 24.9     | 8.58861   | 0.166611   | 99.9515  |
| 24.91667 | 8.386716  | 0.15761    | 100      |
| 24.93333 | 9.044296  | 0.1170807  | 99.98615 |
| 24.95    | 9.783847  | 0.1260817  | 99.91685 |



|          |          |            |          |
|----------|----------|------------|----------|
| 24.96667 | 9.820853 | 0.1080751  | 99.79214 |
| 24.98333 | 9.767194 | 0.1576055  | 99.60507 |
| 25       | 11.00115 | 0.1080751  | 99.37643 |
| 25.01667 | 11.67673 | 0.1215789  | 99.12007 |
| 25.03333 | 12.07991 | 0.1305889  | 98.82214 |
| 25.05    | 12.20284 | 0.175621   | 98.46186 |
| 25.06667 | 12.3102  | 0.1260862  | 98.03229 |
| 25.08333 | 12.95237 | 0.1576055  | 97.55421 |
| 25.1     | 13.80638 | 0.1350917  | 97.04843 |
| 25.11667 | 14.31398 | 0.1440972  | 96.50108 |
| 25.13333 | 14.83306 | 0.09005962 | 95.89136 |
| 25.15    | 15.05177 | 0.1395945  | 95.22622 |
| 25.16667 | 15.98805 | 0.1395945  | 94.568   |
| 25.18333 | 16.67589 | 0.1080706  | 93.87514 |
| 25.2     | 17.23294 | 0.1170762  | 93.10608 |
| 25.21667 | 17.9686  | 0.1170762  | 92.30929 |
| 25.23333 | 18.87475 | 0.1170762  | 91.464   |
| 25.25    | 18.90143 | 0.1215834  | 90.57022 |
| 25.26667 | 19.87916 | 0.1531027  | 89.62794 |
| 25.28333 | 20.59303 | 0.1170807  | 88.67179 |
| 25.3     | 21.21495 | 0.1215789  | 87.71565 |
| 25.31667 | 22.41182 | 0.1440972  | 86.71101 |
| 25.33333 | 23.07649 | 0.09906514 | 85.67172 |
| 25.35    | 23.68464 | 0.1981348  | 84.60473 |
| 25.36667 | 24.4172  | 0.1260862  | 83.48923 |
| 25.38333 | 25.28675 | 0.1260862  | 82.32523 |
| 25.4     | 26.43142 | 0.1395945  | 81.13351 |
| 25.41667 | 26.50326 | 0.1305889  | 79.93487 |
| 25.43333 | 26.90713 | 0.1440972  | 78.7293  |
| 25.45    | 28.94812 | 0.1215834  | 77.48909 |
| 25.46667 | 29.32905 | 0.1936275  | 76.21423 |
| 25.48333 | 30.90765 | 0.1350962  | 74.91859 |
| 25.5     | 30.95483 | 0.1125779  | 73.60909 |
| 25.51667 | 31.20845 | 0.1125734  | 72.27187 |
| 25.53333 | 32.62885 | 0.1305889  | 70.91388 |
| 25.55    | 33.38459 | 0.1305889  | 69.5351  |
| 25.56667 | 34.15405 | 0.1891293  | 68.14938 |
| 25.58333 | 35.19537 | 0.1801283  | 66.74981 |
| 25.6     | 36.44686 | 0.1350917  | 65.35717 |
| 25.61667 | 37.46228 | 0.1215789  | 63.94374 |
| 25.63333 | 39.56862 | 0.1215834  | 62.51646 |
| 25.65    | 39.52002 | 0.1170807  | 61.06839 |
| 25.66667 | 40.37741 | 0.1350917  | 59.62032 |
| 25.68333 | 41.35851 | 0.1260817  | 58.17917 |
| 25.7     | 42.74818 | 0.1260862  | 56.72417 |
| 25.71667 | 43.59833 | 0.1711137  | 55.26918 |
| 25.73333 | 45.42294 | 0.1305889  | 53.83496 |

|          |          |            |          |
|----------|----------|------------|----------|
| 25.75    | 45.72023 | 0.1125779  | 52.40075 |
| 25.76667 | 45.96731 | 0.1170762  | 50.95268 |
| 25.78333 | 48.17092 | 0.1350917  | 49.52539 |
| 25.8     | 48.59759 | 0.1260862  | 48.14661 |
| 25.81667 | 50.80425 | 0.1486     | 46.77475 |
| 25.83333 | 50.44745 | 0.1260862  | 45.38211 |
| 25.85    | 52.30331 | 0.1621082  | 43.98254 |
| 25.86667 | 53.91201 | 0.1080751  | 42.62454 |
| 25.88333 | 55.079   | 0.1350917  | 41.27347 |
| 25.9     | 54.92299 | 0.09906514 | 39.93626 |
| 25.91667 | 57.06274 | 0.1486     | 38.64754 |
| 25.93333 | 57.89116 | 0.1531072  | 37.3519  |
| 25.95    | 59.07219 | 0.166611   | 36.07012 |
| 25.96667 | 59.44858 | 0.1350917  | 34.84376 |
| 25.98333 | 60.26499 | 0.1576055  | 33.64512 |
| 26       | 61.63596 | 0.1215834  | 32.45341 |
| 26.01667 | 61.77849 | 0.1305844  | 31.28248 |
| 26.03333 | 64.16696 | 0.1170807  | 30.13234 |
| 26.05    | 65.15169 | 0.1260817  | 29.00298 |
| 26.06667 | 66.48505 | 0.1260862  | 27.91519 |
| 26.08333 | 68.20741 | 0.1440972  | 26.86205 |
| 26.1     | 68.99815 | 0.1801238  | 25.84355 |
| 26.11667 | 69.28913 | 0.1350917  | 24.8597  |
| 26.13333 | 70.71513 | 0.1395945  | 23.88277 |
| 26.15    | 71.80551 | 0.1170762  | 22.91277 |
| 26.16667 | 72.4268  | 0.09456238 | 21.99127 |
| 26.18333 | 73.00923 | 0.09456238 | 21.08363 |
| 26.2     | 74.14139 | 0.1486     | 20.18984 |
| 26.21667 | 75.69089 | 0.1576055  | 19.35842 |
| 26.23333 | 76.43006 | 0.1305934  | 18.56163 |
| 26.25    | 78.17873 | 0.1395945  | 17.7787  |
| 26.26667 | 78.03107 | 0.1215834  | 16.99577 |
| 26.28333 | 79.55125 | 0.1350917  | 16.2267  |
| 26.3     | 79.17737 | 0.1260862  | 15.49227 |
| 26.31667 | 81.32601 | 0.1260862  | 14.80635 |
| 26.33333 | 81.62272 | 0.08105411 | 14.12735 |
| 26.35    | 82.44134 | 0.1936275  | 13.46913 |
| 26.36667 | 84.25698 | 0.1350962  | 12.86635 |
| 26.38333 | 84.82832 | 0.1486     | 12.27049 |
| 26.4     | 86.25139 | 0.1440972  | 11.67463 |
| 26.41667 | 86.29681 | 0.1395945  | 11.12728 |
| 26.43333 | 87.07645 | 0.1305889  | 10.58685 |
| 26.45    | 87.42145 | 0.1260862  | 10.04642 |
| 26.46667 | 87.95399 | 0.1215834  | 9.547565 |
| 26.48333 | 88.80442 | 0.1035679  | 9.09028  |
| 26.5     | 88.52454 | 0.1350872  | 8.639922 |
| 26.51667 | 90.72177 | 0.1260862  | 8.175709 |

|          |          |            |             |
|----------|----------|------------|-------------|
| 26.53333 | 89.60782 | 0.1125734  | 7.718423    |
| 26.55    | 91.3726  | 0.1486     | 7.309638    |
| 26.56667 | 91.07047 | 0.1080751  | 6.935495    |
| 26.58333 | 91.12048 | 0.1305844  | 6.561352    |
| 26.6     | 92.96406 | 0.1395945  | 6.201067    |
| 26.61667 | 93.89567 | 0.1395945  | 5.840782    |
| 26.63333 | 94.28609 | 0.1080751  | 5.494353    |
| 26.65    | 93.34188 | 0.1080706  | 5.147925    |
| 26.66667 | 93.87824 | 0.1440972  | 4.808425    |
| 26.68333 | 96.57553 | 0.1576055  | 4.489711    |
| 26.7     | 95.25011 | 0.1621082  | 4.191783    |
| 26.71667 | 94.95871 | 0.1395945  | 3.91464     |
| 26.73333 | 97.33715 | 0.1305889  | 3.609783    |
| 26.75    | 97.38651 | 0.1215834  | 3.297998    |
| 26.76667 | 98.14436 | 0.1170762  | 3.006998    |
| 26.78333 | 96.58031 | 0.09456238 | 2.722927    |
| 26.8     | 97.24302 | 0.1035679  | 2.438855    |
| 26.81667 | 97.82945 | 0.1350917  | 2.168641    |
| 26.83333 | 96.80742 | 0.1395945  | 1.905356    |
| 26.85    | 98.11047 | 0.1621082  | 1.662856    |
| 26.86667 | 98.35333 | 0.1395945  | 1.420356    |
| 26.88333 | 98.08074 | 0.1621127  | 1.163999    |
| 26.9     | 95.91467 | 0.1125734  | 0.9353565   |
| 26.91667 | 100      | 0.08555687 | 0.7205709   |
| 26.93333 | 99.45768 | 0.1305844  | 0.4711425   |
| 26.95    | 98.73229 | 0.1080751  | 0.2217141   |
| 26.96667 | 97.50696 | 0.1305844  | -0.01385713 |
| 26.98333 | 96.2935  | 0.1305889  | -0.2355713  |
| 27       | 96.59982 | 0.1440972  | -0.4295711  |
| 27.01667 | 97.8889  | 0.09456238 | -0.6097139  |
| 27.03333 | 97.35553 | 0.1125734  | -0.8175709  |
| 27.05    | 96.76528 | 0.1486     | -1.039285   |
| 27.06667 | 97.03973 | 0.1621127  | -1.240213   |
| 27.08333 | 95.55642 | 0.1215834  | -1.420356   |
| 27.1     | 96.7417  | 0.1305844  | -1.59357    |
| 27.11667 | 96.1949  | 0.1305889  | -1.78757    |
| 27.13333 | 96.27542 | 0.1125779  | -1.974641   |
| 27.15    | 95.07397 | 0.1305889  | -2.133998   |
| 27.16667 | 93.68449 | 0.1756165  | -2.279498   |
| 27.18333 | 94.4587  | 0.1350962  | -2.404212   |
| 27.2     | 93.97296 | 0.175621   | -2.549712   |
| 27.21667 | 93.86248 | 0.1711182  | -2.743712   |
| 27.23333 | 94.00245 | 0.08555687 | -2.923855   |
| 27.25    | 91.61643 | 0.1531027  | -3.062426   |
| 27.26667 | 91.84169 | 0.1170807  | -3.180212   |
| 27.28333 | 94.08536 | 0.1395945  | -3.318783   |
| 27.3     | 91.84181 | 0.1395945  | -3.450426   |

|          |          |            |           |
|----------|----------|------------|-----------|
| 27.31667 | 91.22667 | 0.175621   | -3.561283 |
| 27.33333 | 91.12562 | 0.09906964 | -3.685997 |
| 27.35    | 90.0504  | 0.1170762  | -3.81764  |
| 27.36667 | 89.41293 | 0.08105411 | -3.949283 |
| 27.38333 | 89.42905 | 0.1215789  | -4.094783 |
| 27.4     | 86.33615 | 0.1711182  | -4.226426 |
| 27.41667 | 87.94634 | 0.1215834  | -4.337283 |
| 27.43333 | 86.72901 | 0.09906514 | -4.455068 |
| 27.45    | 86.3651  | 0.1260817  | -4.572854 |
| 27.46667 | 85.81788 | 0.1440972  | -4.676783 |
| 27.48333 | 85.44238 | 0.1260862  | -4.794568 |
| 27.5     | 85.68072 | 0.1305889  | -4.919282 |
| 27.51667 | 82.3009  | 0.1260862  | -5.030139 |
| 27.53333 | 82.2871  | 0.1486     | -5.140996 |
| 27.55    | 80.9125  | 0.1260862  | -5.272639 |
| 27.56667 | 81.6309  | 0.1711182  | -5.411211 |
| 27.58333 | 82.35485 | 0.1260862  | -5.515139 |
| 27.6     | 79.60575 | 0.1395945  | -5.584424 |
| 27.61667 | 79.67976 | 0.1531027  | -5.660639 |
| 27.63333 | 78.77364 | 0.1350917  | -5.764567 |
| 27.65    | 77.76802 | 0.1440972  | -5.875424 |
| 27.66667 | 78.38973 | 0.1486     | -5.979353 |
| 27.68333 | 77.26688 | 0.1080706  | -6.055567 |
| 27.7     | 76.63712 | 0.1486     | -6.13871  |
| 27.71667 | 75.29958 | 0.1350917  | -6.242639 |
| 27.73333 | 75.01438 | 0.1711137  | -6.346567 |
| 27.75    | 75.27295 | 0.139599   | -6.436638 |
| 27.76667 | 73.25276 | 0.1080706  | -6.52671  |
| 27.78333 | 73.68621 | 0.1305889  | -6.616781 |
| 27.8     | 71.95807 | 0.1215834  | -6.720709 |
| 27.81667 | 71.07004 | 0.1576055  | -6.838495 |
| 27.83333 | 70.21967 | 0.1395945  | -6.921638 |
| 27.85    | 71.07803 | 0.1170807  | -6.977067 |
| 27.86667 | 69.74783 | 0.09906514 | -7.004781 |
| 27.88333 | 68.71565 | 0.1305889  | -7.060209 |
| 27.9     | 67.09871 | 0.1305889  | -7.157209 |
| 27.91667 | 67.14735 | 0.1486     | -7.274995 |
| 27.93333 | 66.93659 | 0.1305889  | -7.371995 |
| 27.95    | 67.34832 | 0.1305889  | -7.448209 |
| 27.96667 | 65.55512 | 0.1621082  | -7.524423 |
| 27.98333 | 65.26396 | 0.1531072  | -7.58678  |
| 28       | 65.2263  | 0.1576055  | -7.662994 |
| 28.01667 | 65.2756  | 0.1350917  | -7.725352 |
| 28.03333 | 62.82422 | 0.1395945  | -7.794637 |
| 28.05    | 62.56309 | 0.1395945  | -7.870852 |
| 28.06667 | 62.29987 | 0.1486     | -7.953994 |
| 28.08333 | 61.50888 | 0.1666155  | -8.037137 |

|          |          |            |           |
|----------|----------|------------|-----------|
| 28.1     | 60.34037 | 0.1260862  | -8.113352 |
| 28.11667 | 59.71694 | 0.1711182  | -8.189566 |
| 28.13333 | 59.22272 | 0.1125779  | -8.272708 |
| 28.15    | 59.02566 | 0.1080706  | -8.341994 |
| 28.16667 | 58.65938 | 0.1530982  | -8.404351 |
| 28.18333 | 57.65971 | 0.15761    | -8.445923 |
| 28.2     | 57.65995 | 0.1576055  | -8.487494 |
| 28.21667 | 56.32429 | 0.1486     | -8.563708 |
| 28.23333 | 56.11453 | 0.1170807  | -8.646851 |
| 28.25    | 55.26942 | 0.1440927  | -8.702279 |
| 28.26667 | 55.92001 | 0.1215834  | -8.750779 |
| 28.28333 | 54.60445 | 0.1486     | -8.833922 |
| 28.3     | 54.20318 | 0.09005962 | -8.910136 |
| 28.31667 | 54.36277 | 0.1846265  | -8.958636 |
| 28.33333 | 51.93891 | 0.1440972  | -9.000208 |
| 28.35    | 52.47843 | 0.1440972  | -9.069493 |
| 28.36667 | 51.66668 | 0.09456238 | -9.13185  |
| 28.38333 | 52.24256 | 0.1531027  | -9.187279 |
| 28.4     | 50.51052 | 0.1080706  | -9.249637 |
| 28.41667 | 51.08765 | 0.1215834  | -9.311994 |
| 28.43333 | 49.76949 | 0.1395945  | -9.367422 |
| 28.45    | 49.77069 | 0.1440972  | -9.443636 |
| 28.46667 | 48.2701  | 0.1441017  | -9.526779 |
| 28.48333 | 49.22478 | 0.1170762  | -9.575279 |
| 28.5     | 48.7415  | 0.175621   | -9.596065 |
| 28.51667 | 48.24776 | 0.1711182  | -9.644565 |
| 28.53333 | 47.74554 | 0.1395945  | -9.699993 |
| 28.55    | 47.25991 | 0.1080706  | -9.741565 |
| 28.56667 | 46.47419 | 0.1260862  | -9.783135 |
| 28.58333 | 45.84123 | 0.1395945  | -9.845493 |
| 28.6     | 45.83574 | 0.1260862  | -9.887064 |
| 28.61667 | 44.90115 | 0.1305889  | -9.921707 |
| 28.63333 | 44.85263 | 0.1621082  | -9.970207 |
| 28.65    | 44.69134 | 0.1666155  | -10.03256 |
| 28.66667 | 43.49861 | 0.1215834  | -10.08799 |
| 28.68333 | 42.99192 | 0.1080751  | -10.14342 |
| 28.7     | 43.53919 | 0.1080706  | -10.19885 |
| 28.71667 | 43.07094 | 0.1080706  | -10.24042 |
| 28.73333 | 41.77127 | 0.1576055  | -10.28199 |
| 28.75    | 42.6645  | 0.1486     | -10.35821 |
| 28.76667 | 41.78732 | 0.1305889  | -10.41364 |
| 28.78333 | 41.6203  | 0.1486     | -10.44135 |
| 28.8     | 42.32092 | 0.1260862  | -10.46214 |
| 28.81667 | 41.72102 | 0.1531027  | -10.48985 |
| 28.83333 | 40.64562 | 0.193632   | -10.53142 |
| 28.85    | 40.46165 | 0.09456688 | -10.58685 |
| 28.86667 | 40.24784 | 0.06304309 | -10.64921 |

|          |          |            |           |
|----------|----------|------------|-----------|
| 28.88333 | 41.23239 | 0.1305844  | -10.72542 |
| 28.9     | 38.97142 | 0.1801238  | -10.79471 |
| 28.91667 | 38.94011 | 0.1170807  | -10.82935 |
| 28.93333 | 38.84016 | 0.1486     | -10.83628 |
| 28.95    | 39.27084 | 0.08555687 | -10.85013 |
| 28.96667 | 38.37865 | 0.1486     | -10.89171 |
| 28.98333 | 38.35567 | 0.1891293  | -10.94713 |
| 29       | 38.00543 | 0.16662    | -10.99564 |
| 29.01667 | 36.96106 | 0.1486045  | -11.03721 |
| 29.03333 | 36.54491 | 0.1395945  | -11.09956 |
| 29.05    | 37.32233 | 0.1486     | -11.15499 |
| 29.06667 | 35.87847 | 0.1215789  | -11.18271 |
| 29.08333 | 34.97493 | 0.1170807  | -11.21042 |
| 29.1     | 35.94654 | 0.1035679  | -11.24506 |
| 29.11667 | 35.32191 | 0.1440972  | -11.28663 |
| 29.13333 | 35.01931 | 0.184631   | -11.34899 |
| 29.15    | 34.53122 | 0.1531027  | -11.38363 |
| 29.16667 | 34.22242 | 0.09005962 | -11.39749 |
| 29.18333 | 34.32915 | 0.1305844  | -11.41828 |
| 29.2     | 33.7986  | 0.1170807  | -11.46678 |
| 29.21667 | 34.03988 | 0.1215789  | -11.52221 |
| 29.23333 | 33.74758 | 0.1395945  | -11.55685 |
| 29.25    | 33.62988 | 0.1170762  | -11.59842 |
| 29.26667 | 33.12924 | 0.09005962 | -11.62613 |
| 29.28333 | 33.50983 | 0.07655136 | -11.64692 |
| 29.3     | 33.55526 | 0.1440927  | -11.67463 |
| 29.31667 | 32.94474 | 0.1666155  | -11.71621 |
| 29.33333 | 32.73277 | 0.1531072  | -11.76471 |
| 29.35    | 32.86792 | 0.1035679  | -11.82013 |
| 29.36667 | 32.06855 | 0.09906514 | -11.86171 |
| 29.38333 | 32.26026 | 0.1440972  | -11.88249 |
| 29.4     | 32.19434 | 0.1260862  | -11.90328 |
| 29.41667 | 31.52572 | 0.1440972  | -11.93099 |
| 29.43333 | 30.87686 | 0.1621082  | -11.96563 |
| 29.45    | 30.82946 | 0.1125779  | -12.01413 |
| 29.46667 | 31.08275 | 0.1440972  | -12.05571 |
| 29.48333 | 30.92379 | 0.09456238 | -12.08342 |
| 29.5     | 30.93161 | 0.1305889  | -12.13885 |
| 29.51667 | 30.41487 | 0.1621082  | -12.16656 |
| 29.53333 | 30.05223 | 0.1981348  | -12.19428 |
| 29.55    | 30.71626 | 0.1305889  | -12.24278 |
| 29.56667 | 29.44273 | 0.1350917  | -12.27742 |
| 29.58333 | 29.23639 | 0.1170807  | -12.29821 |
| 29.6     | 28.62118 | 0.1621082  | -12.31899 |
| 29.61667 | 29.99648 | 0.1486045  | -12.35363 |
| 29.63333 | 28.83189 | 0.1305889  | -12.40213 |
| 29.65    | 29.37112 | 0.1305889  | -12.44371 |

|          |          |            |           |
|----------|----------|------------|-----------|
| 29.66667 | 29.42183 | 0.1170807  | -12.46449 |
| 29.68333 | 28.37776 | 0.1260862  | -12.47835 |
| 29.7     | 28.2424  | 0.1621082  | -12.51299 |
| 29.71667 | 28.59327 | 0.1440972  | -12.56842 |
| 29.73333 | 28.50219 | 0.1125779  | -12.60999 |
| 29.75    | 28.01034 | 0.1170807  | -12.63078 |
| 29.76667 | 27.79229 | 0.1440972  | -12.67235 |
| 29.78333 | 27.6121  | 0.1486     | -12.71392 |
| 29.8     | 26.81986 | 0.1440972  | -12.72085 |
| 29.81667 | 27.03079 | 0.1305844  | -12.72778 |
| 29.83333 | 25.96882 | 0.1350917  | -12.74856 |
| 29.85    | 26.10835 | 0.1125734  | -12.79013 |
| 29.86667 | 26.69516 | 0.1260862  | -12.82478 |
| 29.88333 | 26.67704 | 0.1531027  | -12.85942 |
| 29.9     | 26.34749 | 0.1080751  | -12.88713 |
| 29.91667 | 26.60462 | 0.1215789  | -12.92871 |
| 29.93333 | 25.76395 | 0.1621082  | -12.97721 |
| 29.95    | 26.33429 | 0.1350917  | -13.02571 |
| 29.96667 | 25.27874 | 0.1260862  | -13.06035 |
| 29.98333 | 25.02186 | 0.1035679  | -13.08806 |
| 30       | 26.39706 | 0.1350917  | -13.1227  |
| 30.01667 | 25.15891 | 0.09456238 | -13.16428 |
| 30.03333 | 24.52705 | 0.0720486  | -13.21278 |
| 30.05    | 25.37254 | 0.1531027  | -13.26128 |
| 30.06667 | 24.83891 | 0.1170807  | -13.29592 |
| 30.08333 | 25.55566 | 0.1350917  | -13.30978 |
| 30.1     | 24.41252 | 0.1215834  | -13.32363 |
| 30.11667 | 24.70522 | 0.1260817  | -13.35828 |
| 30.13333 | 24.27116 | 0.1035679  | -13.39985 |
| 30.15    | 24.43765 | 0.09906514 | -13.44142 |
| 30.16667 | 23.94022 | 0.1215789  | -13.48299 |
| 30.18333 | 22.99503 | 0.1576055  | -13.48992 |
| 30.2     | 23.4125  | 0.1395945  | -13.49685 |
| 30.21667 | 23.77931 | 0.1215834  | -13.52456 |
| 30.23333 | 23.39306 | 0.1260817  | -13.55921 |
| 30.25    | 24.08746 | 0.1440972  | -13.59385 |
| 30.26667 | 23.28701 | 0.1846265  | -13.64235 |
| 30.28333 | 22.96254 | 0.1486     | -13.67006 |
| 30.3     | 22.83124 | 0.1395945  | -13.69778 |
| 30.31667 | 22.75484 | 0.1486     | -13.72549 |
| 30.33333 | 22.56505 | 0.1125779  | -13.76706 |
| 30.35    | 23.0721  | 0.06754585 | -13.79478 |
| 30.36667 | 22.10985 | 0.1125734  | -13.82942 |
| 30.38333 | 22.90712 | 0.193632   | -13.88485 |
| 30.4     | 21.93463 | 0.15761    | -13.91949 |
| 30.41667 | 22.16276 | 0.1486     | -13.94028 |
| 30.43333 | 22.65253 | 0.1441017  | -13.96799 |

|          |          |            |           |
|----------|----------|------------|-----------|
| 30.45    | 22.59093 | 0.1260862  | -14.00263 |
| 30.46667 | 22.03745 | 0.1305844  | -14.02342 |
| 30.48333 | 21.65813 | 0.1215834  | -14.05113 |
| 30.5     | 21.82574 | 0.1395945  | -14.09963 |
| 30.51667 | 21.75973 | 0.1486     | -14.13428 |
| 30.53333 | 21.75464 | 0.1350917  | -14.1412  |
| 30.55    | 21.68645 | 0.1531027  | -14.16892 |
| 30.56667 | 21.66222 | 0.1486     | -14.21049 |
| 30.58333 | 21.26034 | 0.1711182  | -14.24513 |
| 30.6     | 21.27968 | 0.1305889  | -14.26592 |
| 30.61667 | 21.68422 | 0.1711182  | -14.2867  |
| 30.63333 | 21.01417 | 0.1080706  | -14.30056 |
| 30.65    | 21.80261 | 0.1395945  | -14.32828 |
| 30.66667 | 20.70535 | 0.1350917  | -14.36292 |
| 30.68333 | 20.69032 | 0.1350917  | -14.39063 |
| 30.7     | 21.21593 | 0.1531027  | -14.42528 |
| 30.71667 | 20.76355 | 0.1260862  | -14.46685 |
| 30.73333 | 20.60579 | 0.1350872  | -14.50842 |
| 30.75    | 21.03461 | 0.1260862  | -14.5292  |
| 30.76667 | 20.7931  | 0.1576055  | -14.54306 |
| 30.78333 | 20.37426 | 0.1170807  | -14.56385 |
| 30.8     | 20.5425  | 0.1621082  | -14.61235 |
| 30.81667 | 20.04992 | 0.1531072  | -14.66085 |
| 30.83333 | 19.83576 | 0.1440972  | -14.6747  |
| 30.85    | 20.59845 | 0.09005962 | -14.69549 |
| 30.86667 | 19.69571 | 0.1440972  | -14.7232  |
| 30.88333 | 19.70676 | 0.15761    | -14.76478 |
| 30.9     | 19.92534 | 0.1170807  | -14.79249 |
| 30.91667 | 20.12899 | 0.1215789  | -14.80635 |
| 30.93333 | 19.63715 | 0.1080751  | -14.79942 |
| 30.95    | 19.32325 | 0.1350917  | -14.81328 |
| 30.96667 | 19.41677 | 0.09456238 | -14.88256 |
| 30.98333 | 19.62664 | 0.1440972  | -14.95185 |
| 31       | 18.89562 | 0.1440972  | -14.97956 |
| 31.01667 | 18.95292 | 0.1440972  | -14.9657  |
| 31.03333 | 18.92675 | 0.1395945  | -14.9657  |
| 31.05    | 19.99213 | 0.1035679  | -15.00035 |
| 31.06667 | 19.34189 | 0.1350872  | -15.02113 |
| 31.08333 | 19.22692 | 0.1395945  | -15.03499 |
| 31.1     | 19.13202 | 0.09906514 | -15.05577 |
| 31.11667 | 18.63449 | 0.1215789  | -15.09042 |
| 31.13333 | 18.34772 | 0.1440972  | -15.13199 |
| 31.15    | 18.90702 | 0.1621082  | -15.16663 |
| 31.16667 | 18.39981 | 0.1486     | -15.2082  |
| 31.18333 | 18.44893 | 0.09005962 | -15.2567  |
| 31.2     | 18.01013 | 0.1350917  | -15.29135 |
| 31.21667 | 17.99139 | 0.09456238 | -15.31906 |



|          |          |            |           |
|----------|----------|------------|-----------|
| 31.23333 | 18.42513 | 0.1215789  | -15.33985 |
| 31.25    | 18.47421 | 0.1125734  | -15.36063 |
| 31.26667 | 18.55061 | 0.1170762  | -15.37449 |
| 31.28333 | 18.62433 | 0.1486     | -15.39528 |
| 31.3     | 18.36014 | 0.1350917  | -15.42299 |
| 31.31667 | 17.75955 | 0.1305889  | -15.46456 |
| 31.33333 | 18.10974 | 0.1350917  | -15.4992  |
| 31.35    | 17.80609 | 0.1395945  | -15.50613 |
| 31.36667 | 17.26188 | 0.1125734  | -15.4992  |
| 31.38333 | 17.55538 | 0.1125734  | -15.50613 |
| 31.4     | 17.74822 | 0.1125734  | -15.54077 |
| 31.41667 | 17.13541 | 0.1395945  | -15.58235 |
| 31.43333 | 16.72007 | 0.1350917  | -15.61699 |
| 31.45    | 17.79788 | 0.1486     | -15.63085 |
| 31.46667 | 17.20263 | 0.1260862  | -15.65163 |
| 31.48333 | 17.17523 | 0.1035679  | -15.67935 |
| 31.5     | 16.90017 | 0.1440972  | -15.71399 |
| 31.51667 | 17.23405 | 0.1305889  | -15.7417  |
| 31.53333 | 17.3621  | 0.1260862  | -15.76942 |
| 31.55    | 16.89983 | 0.1395945  | -15.80406 |
| 31.56667 | 16.28712 | 0.1125734  | -15.81099 |
| 31.58333 | 16.45479 | 0.1711137  | -15.81792 |
| 31.6     | 16.48148 | 0.1080751  | -15.83177 |
| 31.61667 | 16.56557 | 0.1756165  | -15.85256 |
| 31.63333 | 16.36672 | 0.09906964 | -15.87335 |
| 31.65    | 16.78101 | 0.1035679  | -15.90106 |
| 31.66667 | 16.56677 | 0.1305889  | -15.94263 |
| 31.68333 | 16.03908 | 0.1395945  | -15.99113 |
| 31.7     | 15.97416 | 0.1305889  | -16.02577 |
| 31.71667 | 16.09441 | 0.1395945  | -16.04656 |
| 31.73333 | 16.59275 | 0.166611   | -16.05349 |
| 31.75    | 16.38132 | 0.1170807  | -16.06042 |
| 31.76667 | 16.48022 | 0.1260862  | -16.06735 |
| 31.78333 | 16.19339 | 0.1305889  | -16.09506 |
| 31.8     | 15.8974  | 0.1486     | -16.11584 |
| 31.81667 | 15.82468 | 0.1350917  | -16.14356 |
| 31.83333 | 15.83525 | 0.1621082  | -16.1782  |
| 31.85    | 15.4926  | 0.1170807  | -16.20592 |
| 31.86667 | 15.75664 | 0.1531027  | -16.21284 |
| 31.88333 | 15.26521 | 0.1486     | -16.23363 |
| 31.9     | 15.1787  | 0.1170807  | -16.26827 |
| 31.91667 | 15.74224 | 0.1621082  | -16.28906 |
| 31.93333 | 15.76931 | 0.1080751  | -16.28906 |
| 31.95    | 15.32559 | 0.1260817  | -16.30984 |
| 31.96667 | 15.22088 | 0.1891293  | -16.33063 |
| 31.98333 | 15.3457  | 0.09906964 | -16.34449 |
| 32       | 14.89154 | 0.1485955  | -16.39299 |

|          |          |            |           |
|----------|----------|------------|-----------|
| 32.01667 | 15.24362 | 0.1125779  | -16.44149 |
| 32.03333 | 15.24953 | 0.1395945  | -16.48306 |
| 32.05    | 15.08216 | 0.211643   | -16.51077 |
| 32.06667 | 14.78294 | 0.1215834  | -16.5177  |
| 32.08333 | 14.80408 | 0.1260817  | -16.51077 |
| 32.1     | 14.85234 | 0.1305889  | -16.51077 |
| 32.11666 | 15.15248 | 0.1260862  | -16.53849 |
| 32.13334 | 14.77668 | 0.0720486  | -16.57313 |
| 32.15    | 15.01909 | 0.1215789  | -16.59392 |
| 32.16667 | 14.56616 | 0.1621082  | -16.60777 |
| 32.18333 | 14.34685 | 0.1486     | -16.62163 |
| 32.2     | 14.11308 | 0.1801238  | -16.62856 |
| 32.21667 | 14.59735 | 0.1305889  | -16.63549 |
| 32.23333 | 14.37753 | 0.1035679  | -16.67706 |
| 32.25    | 14.66559 | 0.1576055  | -16.71863 |
| 32.26667 | 13.93956 | 0.09456238 | -16.7602  |
| 32.28333 | 14.20036 | 0.1395945  | -16.78792 |
| 32.3     | 14.15938 | 0.1035679  | -16.79485 |
| 32.31667 | 14.03364 | 0.08555687 | -16.80177 |
| 32.33333 | 14.0634  | 0.1170807  | -16.81563 |
| 32.35    | 14.26747 | 0.07655136 | -16.82949 |
| 32.36666 | 14.2316  | 0.1260862  | -16.84335 |
| 32.38334 | 13.9261  | 0.09456238 | -16.87106 |
| 32.4     | 14.29117 | 0.13959    | -16.89877 |
| 32.41667 | 14.17766 | 0.1846265  | -16.91263 |
| 32.43333 | 13.51798 | 0.1305889  | -16.92649 |
| 32.45    | 13.64063 | 0.09005962 | -16.9542  |
| 32.46667 | 13.54603 | 0.1395945  | -16.96113 |
| 32.48333 | 13.6823  | 0.1576055  | -16.96113 |
| 32.5     | 13.72032 | 0.1666155  | -16.98885 |
| 32.51667 | 13.75541 | 0.1080751  | -17.03042 |
| 32.53333 | 14.04371 | 0.09906514 | -17.0512  |
| 32.55    | 13.51209 | 0.1035679  | -17.07892 |
| 32.56667 | 13.43045 | 0.1395945  | -17.12049 |
| 32.58333 | 13.23304 | 0.1170807  | -17.13434 |
| 32.6     | 13.56803 | 0.1125734  | -17.11356 |
| 32.61666 | 13.70141 | 0.08105411 | -17.12742 |
| 32.63334 | 12.7535  | 0.1981348  | -17.15513 |
| 32.65    | 13.70408 | 0.09906514 | -17.17592 |
| 32.66667 | 13.01753 | 0.1215789  | -17.20363 |
| 32.68333 | 13.19463 | 0.15761    | -17.23134 |
| 32.7     | 12.9864  | 0.1305889  | -17.23134 |
| 32.71667 | 13.40475 | 0.1125734  | -17.25213 |
| 32.73333 | 13.20275 | 0.1305889  | -17.27984 |
| 32.75    | 12.86019 | 0.166611   | -17.2937  |
| 32.76667 | 13.26026 | 0.09906514 | -17.31449 |
| 32.78333 | 13.29207 | 0.1531027  | -17.34913 |

|          |          |            |           |
|----------|----------|------------|-----------|
| 32.8     | 12.53024 | 0.1395945  | -17.36992 |
| 32.81667 | 13.10828 | 0.1486     | -17.35606 |
| 32.83333 | 12.75214 | 0.1440972  | -17.34913 |
| 32.85    | 12.54686 | 0.1486045  | -17.36992 |
| 32.86666 | 12.31168 | 0.1350917  | -17.3907  |
| 32.88334 | 12.62813 | 0.08555687 | -17.41149 |
| 32.9     | 12.51014 | 0.1440927  | -17.4392  |
| 32.91667 | 12.86241 | 0.1531027  | -17.47384 |
| 32.93333 | 12.63119 | 0.1080706  | -17.49463 |
| 32.95    | 12.53439 | 0.1531027  | -17.49463 |
| 32.96667 | 12.35277 | 0.09456238 | -17.50156 |
| 32.98333 | 12.29962 | 0.1305844  | -17.52927 |
| 33       | 12.41268 | 0.1846265  | -17.55699 |
| 33.01667 | 12.16152 | 0.1350917  | -17.5847  |
| 33.03333 | 12.56176 | 0.1305889  | -17.61242 |
| 33.05    | 12.74297 | 0.09906514 | -17.64013 |
| 33.06667 | 12.40878 | 0.1350917  | -17.66784 |
| 33.08333 | 12.31731 | 0.1621127  | -17.6817  |
| 33.1     | 12.05918 | 0.1215834  | -17.6817  |
| 33.11666 | 12.36979 | 0.1080706  | -17.68863 |
| 33.13334 | 12.38326 | 0.1486     | -17.68863 |
| 33.15    | 12.24506 | 0.1305889  | -17.6817  |
| 33.16667 | 12.18454 | 0.1305889  | -17.68863 |
| 33.18333 | 12.29829 | 0.1260862  | -17.72327 |
| 33.2     | 12.11332 | 0.1260862  | -17.74406 |
| 33.21667 | 11.67454 | 0.1440972  | -17.77177 |
| 33.23333 | 11.63111 | 0.1260862  | -17.80642 |
| 33.25    | 11.75705 | 0.1260862  | -17.8272  |
| 33.26667 | 12.29039 | 0.1215834  | -17.83413 |
| 33.28333 | 12.24491 | 0.08555687 | -17.85492 |
| 33.3     | 11.70424 | 0.1395945  | -17.88956 |
| 33.31667 | 11.49961 | 0.1035679  | -17.91035 |
| 33.33333 | 11.92447 | 0.1170807  | -17.93113 |
| 33.35    | 11.52399 | 0.1260817  | -17.93806 |
| 33.36666 | 11.69687 | 0.1440972  | -17.96577 |
| 33.38334 | 11.36041 | 0.1035679  | -17.99349 |
| 33.4     | 11.42708 | 0.1080706  | -18.00735 |
| 33.41667 | 12.07273 | 0.1350917  | -18.01427 |
| 33.43333 | 11.77116 | 0.1395945  | -18.03506 |
| 33.45    | 11.32557 | 0.1260907  | -18.03506 |
| 33.46667 | 11.14931 | 0.1170762  | -18.04199 |
| 33.48333 | 11.2942  | 0.1441017  | -18.07663 |
| 33.5     | 11.46169 | 0.1305844  | -18.09049 |
| 33.51667 | 11.34852 | 0.1170762  | -18.09049 |
| 33.53333 | 11.11435 | 0.1395945  | -18.11127 |
| 33.55    | 11.20372 | 0.1170807  | -18.12513 |
| 33.56667 | 11.03595 | 0.1531027  | -18.13899 |

|          |          |            |           |
|----------|----------|------------|-----------|
| 33.58333 | 10.76556 | 0.1350917  | -18.15977 |
| 33.6     | 10.90238 | 0.1080706  | -18.17363 |
| 33.61666 | 10.90925 | 0.1125734  | -18.17363 |
| 33.63334 | 10.74136 | 0.1170762  | -18.1667  |
| 33.65    | 10.69936 | 0.1215834  | -18.18056 |
| 33.66667 | 10.7522  | 0.1125734  | -18.20827 |
| 33.68333 | 11.26259 | 0.1305889  | -18.22906 |
| 33.7     | 11.15023 | 0.1486     | -18.23599 |
| 33.71667 | 10.24504 | 0.1170807  | -18.24984 |
| 33.73333 | 10.69167 | 0.1170762  | -18.25677 |
| 33.75    | 11.11098 | 0.1531027  | -18.29834 |
| 33.76667 | 10.47304 | 0.1125779  | -18.33992 |
| 33.78333 | 11.17139 | 0.1621082  | -18.35377 |
| 33.8     | 10.61592 | 0.1395945  | -18.3607  |
| 33.81667 | 10.87241 | 0.1350917  | -18.38842 |
| 33.83333 | 10.24985 | 0.1215834  | -18.42999 |
| 33.85    | 10.90105 | 0.1891248  | -18.44384 |
| 33.86666 | 10.73519 | 0.1305889  | -18.44384 |
| 33.88334 | 10.31573 | 0.1621082  | -18.4577  |
| 33.9     | 10.22398 | 0.1666155  | -18.48541 |
| 33.91667 | 10.45757 | 0.1080751  | -18.47849 |
| 33.93333 | 10.88938 | 0.09906514 | -18.47156 |
| 33.95    | 10.57942 | 0.1891293  | -18.48541 |
| 33.96667 | 10.41723 | 0.09456238 | -18.52006 |
| 33.98333 | 10.25443 | 0.1080706  | -18.54777 |
| 34       | 10.06819 | 0.1260817  | -18.56856 |
| 34.01667 | 10.44498 | 0.1305889  | -18.58241 |
| 34.03333 | 10.54206 | 0.09456238 | -18.61013 |
| 34.05    | 10.31492 | 0.1260862  | -18.63784 |
| 34.06667 | 10.45211 | 0.1531027  | -18.64477 |
| 34.08333 | 9.990635 | 0.1260862  | -18.6517  |
| 34.1     | 9.719813 | 0.04953032 | -18.64477 |
| 34.11666 | 9.994556 | 0.1350872  | -18.65863 |
| 34.13334 | 9.355157 | 0.08555687 | -18.67249 |
| 34.15    | 10.42419 | 0.1215789  | -18.67249 |
| 34.16667 | 9.822667 | 0.1215789  | -18.67941 |
| 34.18333 | 9.408207 | 0.1215789  | -18.7002  |
| 34.2     | 10.19778 | 0.08555687 | -18.72791 |
| 34.21667 | 9.426609 | 0.1125734  | -18.76256 |
| 34.23333 | 9.783607 | 0.1260817  | -18.79027 |
| 34.25    | 9.677567 | 0.1215789  | -18.80413 |
| 34.26667 | 9.701244 | 0.1395945  | -18.81799 |
| 34.28333 | 9.264145 | 0.1215834  | -18.82491 |
| 34.3     | 9.447721 | 0.1125779  | -18.83184 |
| 34.31667 | 9.503457 | 0.1621082  | -18.86649 |
| 34.33333 | 9.106892 | 0.09906514 | -18.88727 |
| 34.35    | 9.555893 | 0.1215789  | -18.88727 |

|          |          |            |           |
|----------|----------|------------|-----------|
| 34.36666 | 9.125478 | 0.1486     | -18.8942  |
| 34.38334 | 9.406339 | 0.1305889  | -18.90806 |
| 34.4     | 10.01705 | 0.1395945  | -18.92192 |
| 34.41667 | 9.726134 | 0.08555687 | -18.9427  |
| 34.43333 | 9.437604 | 0.09456238 | -18.94963 |
| 34.45    | 9.227675 | 0.13959    | -18.94963 |
| 34.46667 | 9.537683 | 0.08555687 | -18.9427  |
| 34.48333 | 9.305204 | 0.1531027  | -18.94963 |
| 34.5     | 9.40071  | 0.1170807  | -18.97042 |
| 34.51667 | 8.837263 | 0.1035679  | -19.00506 |
| 34.53333 | 9.4719   | 0.09005962 | -19.03277 |
| 34.55    | 9.370431 | 0.09906514 | -19.06049 |
| 34.56667 | 9.256928 | 0.1125734  | -19.06049 |
| 34.58333 | 9.058867 | 0.1035679  | -19.07434 |
| 34.6     | 9.213816 | 0.1350917  | -19.11592 |
| 34.61666 | 9.37625  | 0.1125734  | -19.15749 |
| 34.63334 | 9.287095 | 0.1666155  | -19.15749 |
| 34.65    | 9.538011 | 0.1215834  | -19.12284 |
| 34.66667 | 9.197479 | 0.1170807  | -19.12284 |
| 34.68333 | 9.358344 | 0.1576055  | -19.17134 |
| 34.7     | 8.675713 | 0.1666155  | -19.19213 |
| 34.71667 | 8.961665 | 0.1395945  | -19.19906 |
| 34.73333 | 9.046439 | 0.1440972  | -19.19213 |
| 34.75    | 8.764642 | 0.1621127  | -19.19906 |
| 34.76667 | 8.884059 | 0.1125779  | -19.22677 |
| 34.78333 | 9.045801 | 0.1170762  | -19.24756 |
| 34.8     | 8.615338 | 0.1350917  | -19.26142 |
| 34.81667 | 8.991527 | 0.1260862  | -19.27527 |
| 34.83333 | 8.435201 | 0.1215834  | -19.2822  |
| 34.85    | 8.643642 | 0.1125734  | -19.30299 |
| 34.86666 | 9.039438 | 0.1305889  | -19.32377 |
| 34.88334 | 8.153809 | 0.1305889  | -19.34456 |
| 34.9     | 8.70287  | 0.1531027  | -19.34456 |
| 34.91667 | 7.853829 | 0.1260862  | -19.35149 |
| 34.93333 | 8.162868 | 0.1756165  | -19.36534 |
| 34.95    | 8.607292 | 0.1260862  | -19.38613 |
| 34.96667 | 8.77554  | 0.08555687 | -19.39999 |
| 34.98333 | 8.782124 | 0.1305844  | -19.41384 |
| 35       | 8.452838 | 0.1260862  | -19.4277  |
| 35.01667 | 8.46998  | 0.1531027  | -19.4277  |
| 35.03333 | 8.643708 | 0.09906514 | -19.40691 |
| 35.05    | 8.266762 | 0.1440972  | -19.41384 |
| 35.06667 | 7.919188 | 0.1215789  | -19.44849 |
| 35.08333 | 8.348391 | 0.1305889  | -19.46234 |
| 35.1     | 8.104208 | 0.202642   | -19.46234 |
| 35.11666 | 8.253845 | 0.15761    | -19.48313 |
| 35.13334 | 7.960527 | 0.1035679  | -19.51084 |

|          |          |            |           |
|----------|----------|------------|-----------|
| 35.15    | 7.953968 | 0.1801238  | -19.50391 |
| 35.16667 | 8.360459 | 0.1260862  | -19.51084 |
| 35.18333 | 7.954672 | 0.09456238 | -19.5247  |
| 35.2     | 8.522416 | 0.1486     | -19.53856 |
| 35.21667 | 7.853674 | 0.1305889  | -19.55934 |
| 35.23333 | 8.13321  | 0.1395945  | -19.58013 |
| 35.25    | 7.930272 | 0.1350917  | -19.58706 |
| 35.26667 | 7.510786 | 0.1260862  | -19.60091 |
| 35.28333 | 7.845061 | 0.1125734  | -19.60784 |
| 35.3     | 7.726062 | 0.1395945  | -19.61477 |
| 35.31667 | 7.881393 | 0.1260862  | -19.6217  |
| 35.33333 | 7.840018 | 0.1305844  | -19.63556 |
| 35.35    | 7.821813 | 0.1305889  | -19.66327 |
| 35.36666 | 7.618444 | 0.1305844  | -19.70484 |
| 35.38334 | 7.959029 | 0.193632   | -19.7187  |
| 35.4     | 7.738202 | 0.1215834  | -19.69791 |
| 35.41667 | 8.013321 | 0.1395945  | -19.69099 |
| 35.43333 | 7.702652 | 0.1215834  | -19.71177 |
| 35.45    | 7.755344 | 0.1215789  | -19.73256 |
| 35.46667 | 7.516796 | 0.1080706  | -19.74641 |
| 35.48333 | 7.940806 | 0.1260862  | -19.75334 |
| 35.5     | 7.863642 | 0.1486     | -19.76027 |
| 35.51667 | 7.924046 | 0.1576055  | -19.78799 |
| 35.53333 | 7.731893 | 0.09906964 | -19.80877 |
| 35.55    | 7.318806 | 0.1260817  | -19.80877 |
| 35.56667 | 7.330009 | 0.1440972  | -19.80184 |
| 35.58333 | 7.557175 | 0.1621082  | -19.80184 |
| 35.6     | 7.306982 | 0.1035724  | -19.79491 |
| 35.61666 | 7.395236 | 0.1440927  | -19.80184 |
| 35.63334 | 7.204122 | 0.1125779  | -19.82956 |
| 35.65    | 7.461502 | 0.1486     | -19.85727 |
| 35.66667 | 7.653296 | 0.1125779  | -19.8642  |
| 35.68333 | 7.043114 | 0.1486     | -19.87113 |
| 35.7     | 7.221532 | 0.1486045  | -19.87113 |
| 35.71667 | 7.245915 | 0.08555687 | -19.87113 |
| 35.73333 | 7.718469 | 0.1485955  | -19.89191 |
| 35.75    | 7.246977 | 0.07655136 | -19.89884 |
| 35.76667 | 7.449337 | 0.1080706  | -19.9127  |
| 35.78333 | 7.144428 | 0.1350917  | -19.91963 |
| 35.8     | 7.287452 | 0.1260862  | -19.92656 |
| 35.81667 | 7.222141 | 0.1080751  | -19.92656 |
| 35.83333 | 7.060543 | 0.1080706  | -19.94734 |
| 35.85    | 6.802476 | 0.1486     | -19.96813 |
| 35.86666 | 7.119293 | 0.1170807  | -19.96813 |
| 35.88334 | 6.850835 | 0.1125734  | -19.97506 |
| 35.9     | 6.91583  | 0.1260862  | -19.98199 |
| 35.91667 | 7.089312 | 0.1350917  | -19.98891 |

|          |          |            |           |
|----------|----------|------------|-----------|
| 35.93333 | 7.257697 | 0.1215834  | -19.98199 |
| 35.95    | 6.886606 | 0.1035679  | -19.97506 |
| 35.96667 | 7.20331  | 0.1395945  | -19.99584 |
| 35.98333 | 7.401205 | 0.1305889  | -20.03741 |
| 36       | 6.665702 | 0.1305889  | -20.06513 |
| 36.01667 | 6.723701 | 0.1035679  | -20.06513 |
| 36.03333 | 6.634771 | 0.1305844  | -20.0582  |
| 36.05    | 6.867721 | 0.1170807  | -20.06513 |
| 36.06667 | 6.509081 | 0.1576055  | -20.06513 |
| 36.08333 | 6.998742 | 0.1170762  | -20.0582  |
| 36.1     | 7.16166  | 0.1576055  | -20.07899 |
| 36.11666 | 6.700834 | 0.139599   | -20.1067  |
| 36.13334 | 6.885532 | 0.166611   | -20.11363 |
| 36.15    | 6.784612 | 0.1621127  | -20.11363 |
| 36.16667 | 6.694424 | 0.1305889  | -20.12056 |
| 36.18333 | 6.772059 | 0.08105411 | -20.12056 |
| 36.2     | 6.969578 | 0.1215789  | -20.12056 |
| 36.21667 | 6.455147 | 0.1350917  | -20.14827 |
| 36.23333 | 6.926782 | 0.1576055  | -20.18291 |
| 36.25    | 6.892247 | 0.1440972  | -20.2037  |
| 36.26667 | 6.419346 | 0.1215834  | -20.21756 |
| 36.28333 | 6.975016 | 0.1440972  | -20.21756 |
| 36.3     | 6.365311 | 0.1260862  | -20.22449 |
| 36.31667 | 6.502276 | 0.09005962 | -20.24527 |
| 36.33333 | 6.352526 | 0.1305844  | -20.2522  |
| 36.35    | 6.592071 | 0.1260862  | -20.2522  |
| 36.36666 | 6.238952 | 0.1170762  | -20.24527 |
| 36.38334 | 6.615773 | 0.1576055  | -20.2522  |
| 36.4     | 6.675741 | 0.1260862  | -20.27991 |
| 36.41667 | 6.407158 | 0.1486     | -20.30763 |
| 36.43333 | 6.3467   | 0.1170807  | -20.31456 |
| 36.45    | 6.214838 | 0.1170807  | -20.32841 |
| 36.46667 | 6.238504 | 0.09906514 | -20.34227 |
| 36.48333 | 6.172621 | 0.184622   | -20.3492  |
| 36.5     | 6.435742 | 0.1305889  | -20.3492  |
| 36.51667 | 6.304841 | 0.1486     | -20.36306 |
| 36.53333 | 6.256631 | 0.1215789  | -20.36999 |
| 36.55    | 6.316325 | 0.1576055  | -20.36306 |
| 36.56667 | 6.424151 | 0.1260862  | -20.36999 |
| 36.58333 | 6.089374 | 0.1170807  | -20.39077 |
| 36.6     | 6.118866 | 0.1260862  | -20.41849 |
| 36.61666 | 6.154428 | 0.1486     | -20.41849 |
| 36.63334 | 6.406084 | 0.1486     | -20.3977  |
| 36.65    | 6.358423 | 0.1080751  | -20.36999 |
| 36.66667 | 6.412333 | 0.1170807  | -20.38384 |
| 36.68333 | 6.268545 | 0.1170762  | -20.43234 |
| 36.7     | 5.92759  | 0.1260817  | -20.46699 |

|          |          |            |           |
|----------|----------|------------|-----------|
| 36.71667 | 5.84315  | 0.1305889  | -20.46699 |
| 36.73333 | 6.04625  | 0.07655136 | -20.4462  |
| 36.75    | 6.148698 | 0.1125734  | -20.4462  |
| 36.76667 | 5.903452 | 0.1486     | -20.46006 |
| 36.78333 | 5.77747  | 0.1531072  | -20.47391 |
| 36.8     | 6.087703 | 0.1170807  | -20.4947  |
| 36.81667 | 6.172621 | 0.1801192  | -20.51549 |
| 36.83333 | 6.035136 | 0.1531072  | -20.4947  |
| 36.85    | 6.028564 | 0.1260862  | -20.48084 |
| 36.86666 | 6.100601 | 0.1440927  | -20.51549 |
| 36.88334 | 5.783898 | 0.15761    | -20.52241 |
| 36.9     | 6.033954 | 0.1260862  | -20.51549 |
| 36.91667 | 5.855547 | 0.1486     | -20.5432  |
| 36.93333 | 6.052403 | 0.1305889  | -20.57091 |
| 36.95    | 5.538187 | 0.1440972  | -20.57784 |
| 36.96667 | 5.878515 | 0.1531027  | -20.58477 |
| 36.98333 | 5.896749 | 0.1350917  | -20.58477 |
| 37       | 5.669697 | 0.1801238  | -20.5917  |
| 37.01667 | 5.836728 | 0.1440972  | -20.61249 |
| 37.03333 | 6.040514 | 0.1260862  | -20.61941 |
| 37.05    | 5.968626 | 0.1125734  | -20.61249 |
| 37.06667 | 5.933016 | 0.1080706  | -20.61941 |
| 37.08333 | 5.675564 | 0.1260862  | -20.6402  |
| 37.1     | 5.735049 | 0.1846265  | -20.66099 |
| 37.11666 | 5.783009 | 0.1395945  | -20.6887  |
| 37.13334 | 5.717418 | 0.1440972  | -20.69563 |
| 37.15    | 5.645416 | 0.1621127  | -20.68177 |
| 37.16667 | 5.711001 | 0.1260862  | -20.6887  |
| 37.18333 | 5.956438 | 0.1260817  | -20.70256 |
| 37.2     | 5.705671 | 0.1395945  | -20.70949 |
| 37.21667 | 5.866804 | 0.1260862  | -20.71641 |
| 37.23333 | 5.56787  | 0.175621   | -20.71641 |
| 37.25    | 5.675111 | 0.15761    | -20.72334 |
| 37.26667 | 5.244374 | 0.09906514 | -20.7372  |
| 37.28333 | 6.045247 | 0.09906514 | -20.7372  |
| 37.3     | 5.454535 | 0.1350917  | -20.73027 |
| 37.31667 | 5.435578 | 0.166611   | -20.7372  |
| 37.33333 | 5.585227 | 0.1395945  | -20.75799 |
| 37.35    | 5.579432 | 0.1305889  | -20.79263 |
| 37.36666 | 5.842422 | 0.175621   | -20.80648 |
| 37.38334 | 5.490103 | 0.1125779  | -20.80648 |
| 37.4     | 5.668939 | 0.1440972  | -20.81341 |
| 37.41667 | 5.758972 | 0.1486     | -20.82727 |
| 37.43333 | 5.477777 | 0.1395945  | -20.82034 |
| 37.45    | 5.465565 | 0.1666155  | -20.82727 |
| 37.46667 | 5.184578 | 0.1440972  | -20.84806 |
| 37.48333 | 5.494692 | 0.08555687 | -20.8827  |



|          |          |            |           |
|----------|----------|------------|-----------|
| 37.5     | 5.322147 | 0.09906514 | -20.90348 |
| 37.51667 | 5.39955  | 0.1035679  | -20.88963 |
| 37.53333 | 5.57933  | 0.09906514 | -20.86191 |
| 37.55    | 5.316089 | 0.09906514 | -20.86884 |
| 37.56667 | 5.26197  | 0.1486     | -20.88963 |
| 37.58333 | 4.980649 | 0.1621127  | -20.90348 |
| 37.6     | 5.345264 | 0.1215834  | -20.91734 |
| 37.61666 | 5.519165 | 0.1440972  | -20.92427 |
| 37.63334 | 5.202461 | 0.1260862  | -20.91734 |
| 37.65    | 5.243598 | 0.1531072  | -20.91734 |
| 37.66667 | 5.24407  | 0.1756165  | -20.92427 |
| 37.68333 | 5.375406 | 0.1170807  | -20.9312  |
| 37.7     | 5.327775 | 0.1666155  | -20.92427 |
| 37.71667 | 5.369599 | 0.1440972  | -20.92427 |
| 37.73333 | 5.190392 | 0.1576055  | -20.94506 |
| 37.75    | 5.171997 | 0.1350917  | -20.95198 |
| 37.76667 | 5.411326 | 0.1035679  | -20.92427 |
| 37.78333 | 5.399747 | 0.1486     | -20.91041 |
| 37.8     | 4.927097 | 0.1305889  | -20.9312  |
| 37.81667 | 5.105946 | 0.1170807  | -20.94506 |
| 37.83333 | 5.423228 | 0.08105411 | -20.96584 |
| 37.85    | 5.160346 | 0.166611   | -20.99356 |
| 37.86666 | 5.058309 | 0.1350917  | -21.00741 |
| 37.88334 | 5.309422 | 0.09906514 | -21.02127 |
| 37.9     | 5.357637 | 0.1125734  | -21.03513 |
| 37.91667 | 4.532388 | 0.1035679  | -21.05591 |
| 37.93333 | 5.446023 | 0.1891248  | -21.05591 |
| 37.95    | 4.9452   | 0.1035724  | -21.04898 |
| 37.96667 | 5.231421 | 0.1486     | -21.03513 |
| 37.98333 | 5.632661 | 0.1486045  | -21.04206 |
| 38       | 5.118809 | 0.09906514 | -21.04206 |
| 38.01667 | 5.118152 | 0.1215789  | -21.05591 |
| 38.03333 | 4.693593 | 0.09005962 | -21.08363 |
| 38.05    | 5.105486 | 0.07655136 | -21.08363 |
| 38.06667 | 5.105886 | 0.166611   | -21.0767  |
| 38.08333 | 4.956846 | 0.1395945  | -21.08363 |
| 38.1     | 5.17159  | 0.175621   | -21.09056 |
| 38.11666 | 5.12418  | 0.1170807  | -21.09056 |
| 38.13334 | 5.196122 | 0.1621082  | -21.10441 |
| 38.15    | 4.860784 | 0.1305889  | -21.13906 |
| 38.16667 | 5.314972 | 0.1576055  | -21.1737  |
| 38.18333 | 5.256019 | 0.1215834  | -21.1737  |
| 38.2     | 4.998758 | 0.1035679  | -21.15984 |
| 38.21667 | 4.87872  | 0.1215789  | -21.1737  |
| 38.23333 | 4.848602 | 0.1576055  | -21.19448 |
| 38.25    | 4.765039 | 0.1486     | -21.19448 |
| 38.26667 | 5.165341 | 0.1125779  | -21.19448 |

|          |          |            |           |
|----------|----------|------------|-----------|
| 38.28333 | 4.759267 | 0.13959    | -21.20141 |
| 38.3     | 4.717068 | 0.1215834  | -21.2222  |
| 38.31667 | 5.003874 | 0.1395945  | -21.23606 |
| 38.33333 | 5.058196 | 0.1486     | -21.25684 |
| 38.35    | 4.705279 | 0.1035724  | -21.26377 |
| 38.36666 | 4.848381 | 0.1440972  | -21.26377 |
| 38.38334 | 4.956326 | 0.1170807  | -21.25684 |
| 38.4     | 4.645454 | 0.1440972  | -21.26377 |
| 38.41667 | 5.087401 | 0.1080706  | -21.28456 |
| 38.43333 | 4.849002 | 0.1440972  | -21.30534 |
| 38.45    | 4.699018 | 0.1305889  | -21.31227 |
| 38.46667 | 4.74678  | 0.0720486  | -21.31227 |
| 38.48333 | 4.824614 | 0.13959    | -21.29841 |
| 38.5     | 4.884367 | 0.09456238 | -21.28456 |
| 38.51667 | 4.621418 | 0.1035679  | -21.29148 |
| 38.53333 | 4.66893  | 0.1305889  | -21.29841 |
| 38.55    | 4.645251 | 0.1260817  | -21.28456 |
| 38.56667 | 4.692709 | 0.1350917  | -21.29148 |
| 38.58333 | 4.382195 | 0.1576055  | -21.33998 |
| 38.6     | 4.572695 | 0.1395945  | -21.36077 |
| 38.61666 | 4.609075 | 0.07655136 | -21.3677  |
| 38.63334 | 4.740734 | 0.1125734  | -21.38848 |
| 38.65    | 4.633099 | 0.1080706  | -21.40234 |
| 38.66667 | 4.985961 | 0.1576055  | -21.39541 |
| 38.68333 | 4.765087 | 0.1035679  | -21.40234 |
| 38.7     | 4.866275 | 0.1215834  | -21.4162  |
| 38.71667 | 4.848799 | 0.1350872  | -21.43006 |
| 38.73333 | 4.669133 | 0.175621   | -21.43699 |
| 38.75    | 4.501607 | 0.1305889  | -21.42313 |
| 38.76667 | 4.59694  | 0.1576055  | -21.40234 |
| 38.78333 | 4.609105 | 0.1260862  | -21.40234 |
| 38.8     | 4.429707 | 0.1215834  | -21.4162  |
| 38.81667 | 4.381748 | 0.1350917  | -21.4162  |
| 38.83333 | 4.555027 | 0.1621127  | -21.40927 |
| 38.85    | 4.375737 | 0.1125779  | -21.40927 |
| 38.86666 | 4.453325 | 0.07655136 | -21.44391 |
| 38.88334 | 4.614864 | 0.1080706  | -21.47163 |
| 38.9     | 4.507528 | 0.1260862  | -21.48549 |
| 38.91667 | 4.722571 | 0.1486     | -21.47163 |
| 38.93333 | 4.334129 | 0.09005962 | -21.4647  |
| 38.95    | 4.279837 | 0.1395945  | -21.4647  |
| 38.96667 | 4.656508 | 0.1035679  | -21.47856 |
| 38.98333 | 4.561253 | 0.1440972  | -21.48549 |
| 39       | 4.36408  | 0.1350917  | -21.47856 |
| 39.01667 | 4.549005 | 0.1576055  | -21.49934 |
| 39.03333 | 4.459437 | 0.15761    | -21.5132  |
| 39.05    | 4.734473 | 0.1215834  | -21.5132  |

|          |          |            |           |
|----------|----------|------------|-----------|
| 39.06667 | 4.262372 | 0.1080706  | -21.52013 |
| 39.08333 | 4.441316 | 0.1305889  | -21.52706 |
| 39.1     | 4.399678 | 0.1305889  | -21.53399 |
| 39.11666 | 4.214246 | 0.1395945  | -21.53399 |
| 39.13334 | 4.363364 | 0.1486     | -21.52706 |
| 39.15    | 4.262151 | 0.1350917  | -21.52706 |
| 39.16667 | 3.968869 | 0.1666155  | -21.55477 |
| 39.18333 | 4.685917 | 0.09005962 | -21.58249 |
| 39.2     | 4.519585 | 0.1531027  | -21.58249 |
| 39.21667 | 4.447625 | 0.1305889  | -21.57556 |
| 39.23333 | 4.357777 | 0.09906964 | -21.59634 |
| 39.25    | 4.429379 | 0.1215789  | -21.61713 |
| 39.26667 | 3.981093 | 0.1576055  | -21.61713 |
| 39.28333 | 4.458721 | 0.1711182  | -21.62406 |
| 39.3     | 4.184342 | 0.1125734  | -21.64484 |
| 39.31667 | 4.3455   | 0.1395945  | -21.66563 |
| 39.33333 | 4.136652 | 0.1305889  | -21.66563 |
| 39.35    | 4.410959 | 0.08555687 | -21.6587  |
| 39.36666 | 4.327879 | 0.1486     | -21.6587  |
| 39.38334 | 4.764    | 0.09456238 | -21.63791 |
| 39.4     | 4.226649 | 0.1215834  | -21.62406 |
| 39.41667 | 4.782181 | 0.09906514 | -21.63099 |
| 39.43333 | 4.346126 | 0.1305889  | -21.64484 |
| 39.45    | 4.273892 | 0.1531072  | -21.6587  |
| 39.46667 | 4.656467 | 0.1531027  | -21.6587  |
| 39.48333 | 4.370007 | 0.1486045  | -21.64484 |
| 39.5     | 4.375433 | 0.1080751  | -21.6587  |
| 39.51667 | 4.549077 | 0.1756165  | -21.66563 |
| 39.53333 | 4.244251 | 0.09906514 | -21.6587  |
| 39.55    | 4.1542   | 0.1080706  | -21.6587  |
| 39.56667 | 4.261781 | 0.1080706  | -21.67949 |
| 39.58333 | 4.554932 | 0.1305889  | -21.70027 |
| 39.6     | 4.489287 | 0.1035679  | -21.71413 |
| 39.61666 | 4.005154 | 0.1080706  | -21.71413 |
| 39.63334 | 4.351295 | 0.09005962 | -21.70027 |
| 39.65    | 4.381407 | 0.09906514 | -21.69334 |
| 39.66667 | 4.345881 | 0.1035679  | -21.68641 |
| 39.68333 | 4.261751 | 0.1170807  | -21.68641 |
| 39.7     | 3.993061 | 0.1305889  | -21.70027 |
| 39.71667 | 4.135828 | 0.1395945  | -21.7072  |
| 39.73333 | 4.429164 | 0.1215789  | -21.71413 |
| 39.75    | 4.238186 | 0.08555687 | -21.72799 |
| 39.76667 | 3.933164 | 0.09906514 | -21.74877 |
| 39.78333 | 4.315244 | 0.1170762  | -21.7557  |
| 39.8     | 4.106402 | 0.1305889  | -21.76263 |
| 39.81667 | 4.064358 | 0.1531027  | -21.76956 |
| 39.83333 | 4.040584 | 0.1305889  | -21.78341 |

|          |          |            |           |
|----------|----------|------------|-----------|
| 39.85    | 4.159864 | 0.1440972  | -21.79727 |
| 39.86666 | 4.213989 | 0.1891293  | -21.81806 |
| 39.88334 | 4.130241 | 0.1215834  | -21.81113 |
| 39.9     | 3.998647 | 0.1215834  | -21.8042  |
| 39.91667 | 4.076277 | 0.1531027  | -21.79727 |
| 39.93333 | 4.345273 | 0.1260862  | -21.79727 |
| 39.95    | 4.501052 | 0.09456238 | -21.81806 |
| 39.96667 | 3.849655 | 0.09906514 | -21.8527  |
| 39.98333 | 4.004336 | 0.1531027  | -21.87348 |
| 40       | 4.136061 | 0.1215834  | -21.85963 |
| 40.01667 | 3.92097  | 0.09906514 | -21.86656 |
| 40.03333 | 3.669636 | 0.13959    | -21.86656 |
| 40.05    | 3.938279 | 0.1125734  | -21.86656 |
| 40.06667 | 4.225813 | 0.1440972  | -21.89427 |
| 40.08333 | 4.094315 | 0.1486     | -21.89427 |
| 40.1     | 4.219809 | 0.1531027  | -21.88734 |
| 40.11666 | 4.219946 | 0.08105411 | -21.87348 |
| 40.13334 | 4.136377 | 0.1531027  | -21.85963 |
| 40.15    | 4.028688 | 0.1215789  | -21.86656 |
| 40.16667 | 4.141827 | 0.1260862  | -21.89427 |
| 40.18333 | 4.16609  | 0.1440972  | -21.92198 |
| 40.2     | 4.219809 | 0.193632   | -21.92891 |
| 40.21667 | 4.243851 | 0.1080751  | -21.91506 |
| 40.23333 | 3.944988 | 0.1305844  | -21.9012  |
| 40.25    | 4.058305 | 0.1891293  | -21.90813 |
| 40.26667 | 4.165958 | 0.15761    | -21.92891 |
| 40.28333 | 4.231776 | 0.1305889  | -21.93584 |
| 40.3     | 4.136347 | 0.1395945  | -21.91506 |
| 40.31667 | 3.920994 | 0.1215834  | -21.9012  |
| 40.33333 | 3.944523 | 0.1711137  | -21.91506 |
| 40.35    | 3.855027 | 0.1440972  | -21.9497  |
| 40.36666 | 3.825093 | 0.1170807  | -21.97741 |
| 40.38334 | 3.836774 | 0.1035724  | -21.98434 |
| 40.4     | 4.010316 | 0.1621082  | -21.98434 |
| 40.41667 | 4.076236 | 0.1666155  | -21.97741 |
| 40.43333 | 3.902908 | 0.1531027  | -21.97048 |
| 40.45    | 3.920624 | 0.1215834  | -21.98434 |
| 40.46667 | 3.759365 | 0.1260862  | -21.97741 |
| 40.48333 | 4.105948 | 0.1215834  | -21.97048 |
| 40.5     | 3.861091 | 0.1305889  | -21.9982  |
| 40.51667 | 4.088    | 0.1170762  | -22.03977 |
| 40.53333 | 3.890995 | 0.1486     | -22.06748 |
| 40.55    | 3.675713 | 0.09906514 | -22.07441 |
| 40.56667 | 3.80086  | 0.1215789  | -22.0952  |
| 40.58333 | 3.926563 | 0.1440972  | -22.0952  |
| 40.6     | 4.034269 | 0.07655136 | -22.08134 |
| 40.61666 | 4.088245 | 0.07655136 | -22.08134 |

|          |          |            |           |
|----------|----------|------------|-----------|
| 40.63334 | 4.010364 | 0.1576055  | -22.06748 |
| 40.65    | 4.136079 | 0.1170807  | -22.05363 |
| 40.66667 | 3.885139 | 0.1440972  | -22.05363 |
| 40.68333 | 4.141767 | 0.1260862  | -22.0467  |
| 40.7     | 3.652076 | 0.1305889  | -22.05363 |
| 40.71667 | 4.159488 | 0.166611   | -22.08134 |
| 40.73333 | 3.861228 | 0.1666155  | -22.0952  |
| 40.75    | 4.105823 | 0.1621127  | -22.08827 |
| 40.76667 | 3.789507 | 0.1350917  | -22.0952  |
| 40.78333 | 3.61569  | 0.1170762  | -22.11598 |
| 40.8     | 4.021765 | 0.1305889  | -22.11598 |
| 40.81667 | 3.920964 | 0.175621   | -22.12984 |
| 40.83333 | 3.884757 | 0.1395945  | -22.1437  |
| 40.85    | 4.016369 | 0.1035679  | -22.15756 |
| 40.86666 | 3.681526 | 0.09906514 | -22.15756 |
| 40.88334 | 3.783037 | 0.1260817  | -22.1437  |
| 40.9     | 3.962363 | 0.1395945  | -22.1437  |
| 40.91667 | 3.861055 | 0.1080706  | -22.15756 |
| 40.93333 | 3.62767  | 0.1350917  | -22.16448 |
| 40.95    | 3.800812 | 0.1035679  | -22.17834 |
| 40.96667 | 3.884775 | 0.1350917  | -22.17834 |
| 40.98333 | 3.896599 | 0.1666155  | -22.17141 |
| 41       | 3.66368  | 0.08555687 | -22.16448 |
| 41.01667 | 3.968236 | 0.1440972  | -22.17141 |
| 41.03333 | 3.866958 | 0.09906514 | -22.17141 |
| 41.05    | 3.872963 | 0.1035679  | -22.1922  |
| 41.06667 | 3.795208 | 0.1215789  | -22.20605 |
| 41.08333 | 3.753145 | 0.1531072  | -22.21298 |
| 41.1     | 3.651473 | 0.1125734  | -22.21298 |
| 41.11666 | 3.76494  | 0.1260862  | -22.21991 |
| 41.13334 | 3.693476 | 0.1215834  | -22.22684 |
| 41.15    | 3.79479  | 0.1080706  | -22.21991 |
| 41.16667 | 3.878705 | 0.13959    | -22.20605 |
| 41.18333 | 3.849022 | 0.1125779  | -22.21991 |
| 41.2     | 3.783127 | 0.1440972  | -22.22684 |
| 41.21667 | 3.902693 | 0.1125779  | -22.23377 |
| 41.23333 | 4.052253 | 0.1035679  | -22.26148 |
| 41.25    | 3.777349 | 0.1576055  | -22.29613 |
| 41.26667 | 3.800956 | 0.1350917  | -22.30998 |
| 41.28333 | 3.777074 | 0.1440972  | -22.31691 |
| 41.3     | 3.795166 | 0.1440972  | -22.32384 |
| 41.31667 | 3.520005 | 0.1215834  | -22.30998 |
| 41.33333 | 3.597551 | 0.1260817  | -22.28227 |
| 41.35    | 3.537858 | 0.1531027  | -22.26841 |
| 41.36666 | 3.938208 | 0.1395945  | -22.2892  |
| 41.38334 | 3.842779 | 0.1440972  | -22.30998 |
| 41.4     | 3.735269 | 0.09456238 | -22.33077 |

|          |          |            |           |
|----------|----------|------------|-----------|
| 41.41667 | 3.812965 | 0.1350917  | -22.3377  |
| 41.43333 | 3.633674 | 0.1170807  | -22.34463 |
| 41.45    | 3.60956  | 0.1035679  | -22.34463 |
| 41.46667 | 3.621606 | 0.1350872  | -22.34463 |
| 41.48333 | 3.555776 | 0.1035679  | -22.32384 |
| 41.5     | 4.135291 | 0.1260817  | -22.30998 |
| 41.51667 | 3.873237 | 0.1756165  | -22.32384 |
| 41.53333 | 3.705389 | 0.1531072  | -22.32384 |
| 41.55    | 3.723331 | 0.1170807  | -22.32384 |
| 41.56667 | 3.681311 | 0.1215834  | -22.34463 |
| 41.58333 | 3.7829   | 0.1711182  | -22.35848 |
| 41.6     | 3.801111 | 0.1621127  | -22.35848 |
| 41.61666 | 3.806912 | 0.1350917  | -22.35155 |
| 41.63334 | 3.442429 | 0.15761    | -22.34463 |
| 41.65    | 3.758816 | 0.1486     | -22.34463 |
| 41.66667 | 3.4961   | 0.1260817  | -22.36541 |
| 41.68333 | 3.728936 | 0.1395945  | -22.37927 |
| 41.7     | 3.699253 | 0.1486     | -22.39313 |
| 41.71667 | 3.597701 | 0.09456238 | -22.40005 |
| 41.73333 | 3.705145 | 0.1350872  | -22.41391 |
| 41.75    | 3.681442 | 0.1125734  | -22.40698 |
| 41.76667 | 3.627521 | 0.1170807  | -22.39313 |
| 41.78333 | 3.872551 | 0.1260817  | -22.37927 |
| 41.8     | 3.968493 | 0.1125779  | -22.37927 |
| 41.81667 | 3.855104 | 0.1125734  | -22.3862  |
| 41.83333 | 3.585787 | 0.1576055  | -22.39313 |
| 41.85    | 3.693291 | 0.1035724  | -22.39313 |
| 41.86666 | 3.573676 | 0.1170762  | -22.40005 |
| 41.88334 | 3.579657 | 0.1125779  | -22.4347  |
| 41.9     | 3.597581 | 0.1260862  | -22.45548 |
| 41.91667 | 3.633364 | 0.1531027  | -22.44163 |
| 41.93333 | 3.91438  | 0.166611   | -22.4347  |
| 41.95    | 3.615899 | 0.1080751  | -22.42777 |
| 41.96667 | 3.866457 | 0.2071403  | -22.44163 |
| 41.98333 | 3.490346 | 0.1350917  | -22.45548 |
| 42       | 3.639291 | 0.1080706  | -22.46241 |
| 42.01667 | 3.681281 | 0.1756165  | -22.46934 |
| 42.03333 | 3.394469 | 0.1215834  | -22.47627 |
| 42.05    | 3.693004 | 0.1080706  | -22.49013 |
| 42.06667 | 3.38252  | 0.1170762  | -22.49706 |
| 42.08333 | 3.692855 | 0.1260862  | -22.49706 |
| 42.1     | 3.322778 | 0.1260862  | -22.49013 |
| 42.11666 | 3.705025 | 0.1260862  | -22.49706 |
| 42.13334 | 3.699104 | 0.1440972  | -22.5317  |
| 42.15    | 3.520053 | 0.1035679  | -22.53863 |
| 42.16667 | 3.716975 | 0.1305889  | -22.51784 |
| 42.18333 | 3.579746 | 0.09456238 | -22.51784 |

|          |          |            |           |
|----------|----------|------------|-----------|
| 42.2     | 3.591708 | 0.1531027  | -22.54556 |
| 42.21667 | 3.818635 | 0.08555687 | -22.55248 |
| 42.23333 | 3.609704 | 0.1305844  | -22.5317  |
| 42.25    | 3.615589 | 0.1215834  | -22.51784 |
| 42.26667 | 3.471992 | 0.1395945  | -22.51091 |
| 42.28333 | 3.633364 | 0.1305889  | -22.51784 |
| 42.3     | 3.87855  | 0.1125779  | -22.53863 |
| 42.31667 | 3.376671 | 0.1440972  | -22.54556 |
| 42.33333 | 3.435994 | 0.09456238 | -22.53863 |
| 42.35    | 3.615332 | 0.1215789  | -22.53863 |
| 42.36666 | 3.37648  | 0.1080706  | -22.55248 |
| 42.38334 | 3.579454 | 0.1531027  | -22.55248 |
| 42.4     | 3.561578 | 0.09456238 | -22.53863 |
| 42.41667 | 3.466053 | 0.1440972  | -22.5317  |
| 42.43333 | 3.471974 | 0.09906514 | -22.55941 |
| 42.45    | 3.752805 | 0.09005962 | -22.57327 |
| 42.46667 | 3.561918 | 0.1260817  | -22.57327 |
| 42.48333 | 3.603478 | 0.1215834  | -22.58713 |
| 42.5     | 3.406246 | 0.1170807  | -22.5802  |
| 42.51667 | 3.465904 | 0.1531027  | -22.57327 |
| 42.53333 | 3.752829 | 0.1621082  | -22.58713 |
| 42.55    | 3.537989 | 0.1035724  | -22.60791 |
| 42.56667 | 3.45405  | 0.1305844  | -22.60791 |
| 42.58333 | 3.651187 | 0.1711137  | -22.60791 |
| 42.6     | 3.675313 | 0.1080751  | -22.61484 |
| 42.61666 | 3.472171 | 0.09906514 | -22.6287  |
| 42.63334 | 3.687029 | 0.1170807  | -22.6287  |
| 42.65    | 3.513983 | 0.1260817  | -22.60791 |
| 42.66667 | 3.495909 | 0.1576055  | -22.60098 |
| 42.68333 | 3.489851 | 0.139599   | -22.60098 |
| 42.7     | 3.352414 | 0.1621082  | -22.60098 |
| 42.71667 | 3.489761 | 0.1080706  | -22.60098 |
| 42.73333 | 3.489875 | 0.1305889  | -22.60791 |
| 42.75    | 3.442106 | 0.07655136 | -22.60098 |
| 42.76667 | 3.513696 | 0.1080706  | -22.60098 |
| 42.78333 | 3.316565 | 0.1080706  | -22.62177 |
| 42.8     | 3.394129 | 0.1711182  | -22.63563 |
| 42.81667 | 3.758768 | 0.1080706  | -22.63563 |
| 42.83333 | 3.364596 | 0.1801192  | -22.6287  |
| 42.85    | 3.38825  | 0.1441017  | -22.6287  |
| 42.86666 | 3.304383 | 0.1125779  | -22.6287  |
| 42.88334 | 3.346302 | 0.1080706  | -22.63563 |
| 42.9     | 3.7947   | 0.1170762  | -22.63563 |
| 42.91667 | 3.627616 | 0.1080706  | -22.64256 |
| 42.93333 | 3.51985  | 0.1080706  | -22.64948 |
| 42.95    | 3.453978 | 0.1215834  | -22.65641 |
| 42.96667 | 3.531764 | 0.1350872  | -22.64948 |

|          |          |            |           |
|----------|----------|------------|-----------|
| 42.98333 | 3.633286 | 0.1711182  | -22.64256 |
| 43       | 3.358645 | 0.1260862  | -22.6287  |
| 43.01667 | 3.406109 | 0.1395945  | -22.64256 |
| 43.03333 | 3.471861 | 0.1440972  | -22.6772  |
| 43.05    | 3.059531 | 0.1350917  | -22.68413 |
| 43.06667 | 3.429703 | 0.1305889  | -22.6772  |
| 43.08333 | 3.71097  | 0.1125779  | -22.69106 |
| 43.1     | 3.388602 | 0.1440972  | -22.69798 |
| 43.11666 | 3.662987 | 0.1395945  | -22.70491 |
| 43.13334 | 3.274909 | 0.1215789  | -22.69798 |
| 43.15    | 3.788403 | 0.1305889  | -22.68413 |
| 43.16667 | 3.406586 | 0.0720486  | -22.69798 |
| 43.18333 | 3.214857 | 0.1080706  | -22.73263 |
| 43.2     | 3.60315  | 0.1440972  | -22.74648 |
| 43.21667 | 3.322653 | 0.1080706  | -22.76034 |
| 43.23333 | 3.76448  | 0.1305889  | -22.76727 |
| 43.25    | 3.49619  | 0.1440972  | -22.7742  |
| 43.26667 | 3.537798 | 0.1035724  | -22.76034 |
| 43.28333 | 3.53772  | 0.1215789  | -22.75341 |
| 43.3     | 3.65139  | 0.1170807  | -22.74648 |
| 43.31667 | 3.412298 | 0.1215789  | -22.75341 |
| 43.33333 | 3.645128 | 0.1125734  | -22.76034 |
| 43.35    | 3.567606 | 0.07655136 | -22.76727 |
| 43.36666 | 3.543832 | 0.13959    | -22.76727 |
| 43.38334 | 3.639357 | 0.1395945  | -22.75341 |
| 43.4     | 3.579639 | 0.1080751  | -22.75341 |
| 43.41667 | 3.537893 | 0.184622   | -22.76034 |
| 43.43333 | 3.573515 | 0.1486045  | -22.76034 |
| 43.45    | 3.346522 | 0.1215834  | -22.75341 |
| 43.46667 | 3.663095 | 0.1666155  | -22.7257  |
| 43.48333 | 3.705288 | 0.1170807  | -22.69798 |
| 43.5     | 3.496046 | 0.1350917  | -22.69798 |
| 43.51667 | 3.454044 | 0.1260862  | -22.73956 |
| 43.53333 | 3.328449 | 0.1260817  | -22.76034 |
| 43.55    | 3.657144 | 0.1035679  | -22.76034 |
| 43.56667 | 3.322635 | 0.1486     | -22.76727 |
| 43.58333 | 3.471682 | 0.1080706  | -22.76034 |
| 43.6     | 3.436185 | 0.166611   | -22.76034 |
| 43.61666 | 3.441933 | 0.1440972  | -22.78113 |
| 43.63334 | 3.585423 | 0.15761    | -22.79498 |
| 43.65    | 3.322743 | 0.1440972  | -22.80191 |
| 43.66667 | 3.64492  | 0.1080751  | -22.81577 |
| 43.68333 | 3.352569 | 0.1440927  | -22.81577 |
| 43.7     | 3.418154 | 0.1125779  | -22.81577 |
| 43.71667 | 3.406061 | 0.1576055  | -22.78806 |
| 43.73333 | 3.675128 | 0.1305889  | -22.79498 |
| 43.75    | 3.304806 | 0.1486     | -22.81577 |



|          |          |            |           |
|----------|----------|------------|-----------|
| 43.76667 | 3.316452 | 0.1260862  | -22.80884 |
| 43.78333 | 3.435821 | 0.1305889  | -22.80191 |
| 43.8     | 3.585411 | 0.1440972  | -22.80884 |
| 43.81667 | 3.663441 | 0.1486     | -22.8227  |
| 43.83333 | 3.364447 | 0.09906514 | -22.83656 |
| 43.85    | 3.340303 | 0.1305889  | -22.82963 |
| 43.86666 | 3.376235 | 0.1395945  | -22.80884 |
| 43.88334 | 3.376122 | 0.1170762  | -22.80191 |
| 43.9     | 3.424146 | 0.1260862  | -22.79498 |
| 43.91667 | 3.346391 | 0.1531072  | -22.78806 |
| 43.93333 | 3.364124 | 0.1486     | -22.78806 |
| 43.95    | 3.173004 | 0.1531072  | -22.79498 |
| 43.96667 | 3.184745 | 0.1260862  | -22.79498 |
| 43.98333 | 3.364154 | 0.15761    | -22.80191 |
| 44       | 3.627168 | 0.1350917  | -22.81577 |
| 44.01667 | 3.794909 | 0.1486     | -22.80191 |
| 44.03333 | 3.251147 | 0.1486     | -22.79498 |
| 44.05    | 3.26851  | 0.1305889  | -22.79498 |
| 44.06667 | 3.232751 | 0.1035679  | -22.78806 |
| 44.08333 | 3.603007 | 0.1531027  | -22.78113 |
| 44.1     | 3.663459 | 0.1260862  | -22.78113 |
| 44.11666 | 3.418279 | 0.1711182  | -22.78113 |
| 44.13334 | 3.238714 | 0.1035679  | -22.78806 |
| 44.15    | 3.453805 | 0.1215834  | -22.78806 |
| 44.16667 | 3.262798 | 0.1621082  | -22.7742  |
| 44.18333 | 3.035477 | 0.1215834  | -22.76727 |
| 44.2     | 3.525126 | 0.1486     | -22.76727 |
| 44.21667 | 3.418213 | 0.1170807  | -22.76727 |
| 44.23333 | 3.501782 | 0.09456238 | -22.76034 |
| 44.25    | 3.478003 | 0.1260817  | -22.73956 |
| 44.26667 | 3.49567  | 0.1440972  | -22.73263 |
| 44.28333 | 3.436281 | 0.1035679  | -22.73263 |
| 44.3     | 3.310471 | 0.1080751  | -22.74648 |
| 44.31667 | 3.298533 | 0.1350917  | -22.75341 |
| 44.33333 | 3.531399 | 0.1440972  | -22.73263 |
| 44.35    | 3.37639  | 0.1486045  | -22.71877 |
| 44.36666 | 3.561506 | 0.1080706  | -22.7257  |
| 44.38334 | 3.627401 | 0.07655136 | -22.73956 |
| 44.4     | 3.221029 | 0.1305844  | -22.75341 |
| 44.41667 | 3.752674 | 0.1170807  | -22.73956 |
| 44.43333 | 3.245053 | 0.09456238 | -22.73263 |
| 44.45    | 3.579221 | 0.1621082  | -22.74648 |
| 44.46667 | 3.364614 | 0.1080706  | -22.76034 |
| 44.48333 | 3.423872 | 0.1395945  | -22.76034 |
| 44.5     | 3.567546 | 0.193632   | -22.76034 |
| 44.51667 | 3.376426 | 0.1305889  | -22.76034 |
| 44.53333 | 3.663083 | 0.1395945  | -22.73956 |

|          |          |            |           |
|----------|----------|------------|-----------|
| 44.55    | 3.454211 | 0.1215834  | -22.73263 |
| 44.56667 | 3.244695 | 0.1170762  | -22.75341 |
| 44.58333 | 3.214845 | 0.1215834  | -22.74648 |
| 44.6     | 3.471646 | 0.1440972  | -22.7257  |
| 44.61666 | 3.686898 | 0.1486     | -22.7257  |
| 44.63334 | 3.585859 | 0.1711182  | -22.73263 |
| 44.65    | 3.131336 | 0.1080751  | -22.74648 |
| 44.66667 | 3.071212 | 0.1576055  | -22.76727 |
| 44.68333 | 3.202645 | 0.1125779  | -22.78806 |
| 44.7     | 3.310399 | 0.1621082  | -22.80191 |
| 44.71667 | 3.435911 | 0.1441017  | -22.80884 |
| 44.73333 | 3.471855 | 0.08555687 | -22.80191 |
| 44.75    | 3.603425 | 0.1576055  | -22.81577 |
| 44.76667 | 3.161257 | 0.1035724  | -22.85041 |
| 44.78333 | 3.352181 | 0.1576055  | -22.8712  |
| 44.8     | 3.292427 | 0.1395945  | -22.8712  |
| 44.81667 | 3.328294 | 0.1260862  | -22.87813 |
| 44.83333 | 3.406049 | 0.1035679  | -22.88506 |
| 44.85    | 3.352306 | 0.1350917  | -22.87813 |
| 44.86666 | 3.298444 | 0.1440972  | -22.88506 |
| 44.88334 | 3.388095 | 0.1576055  | -22.87813 |
| 44.9     | 3.459989 | 0.1215834  | -22.87813 |
| 44.91667 | 3.400176 | 0.1215834  | -22.89891 |
| 44.93333 | 3.525729 | 0.1215789  | -22.92663 |
| 44.95    | 3.436173 | 0.1350917  | -22.94741 |
| 44.96667 | 3.483828 | 0.1621082  | -22.94048 |
| 44.98333 | 3.131258 | 0.09005962 | -22.92663 |
| 45       | 3.298378 | 0.1080706  | -22.96127 |
| 45.01667 | 3.45972  | 0.08555687 | -22.99591 |
| 45.03333 | 3.543671 | 0.1305844  | -22.98898 |
| 45.05    | 3.47195  | 0.1440972  | -22.95434 |
| 45.06667 | 3.430109 | 0.166611   | -22.94048 |
| 45.08333 | 3.35843  | 0.1305889  | -22.96127 |
| 45.1     | 3.53741  | 0.1440972  | -22.9682  |
| 45.11666 | 3.495981 | 0.1125734  | -22.9682  |
| 45.13334 | 3.418136 | 0.1576055  | -22.9682  |
| 45.15    | 3.525747 | 0.1170762  | -22.96127 |
| 45.16667 | 3.328544 | 0.1350917  | -22.9682  |
| 45.18333 | 3.531549 | 0.1350917  | -22.98206 |
| 45.2     | 3.555621 | 0.166611   | -23.00284 |
| 45.21667 | 3.173171 | 0.1486     | -23.00284 |
| 45.23333 | 3.411892 | 0.1125779  | -23.00284 |
| 45.25    | 3.418154 | 0.09456238 | -23.0167  |
| 45.26667 | 3.537559 | 0.1305844  | -23.00284 |
| 45.28333 | 3.472088 | 0.1350917  | -22.99591 |
| 45.3     | 3.346337 | 0.1170807  | -23.0167  |
| 45.31667 | 3.483715 | 0.1215789  | -23.03748 |

|          |          |            |           |
|----------|----------|------------|-----------|
| 45.33333 | 3.328491 | 0.1260817  | -23.04441 |
| 45.35    | 3.244814 | 0.1260862  | -23.05134 |
| 45.36666 | 3.178883 | 0.1080751  | -23.05827 |
| 45.38334 | 3.626995 | 0.1080706  | -23.07213 |
| 45.4     | 3.233014 | 0.1260817  | -23.08598 |
| 45.41667 | 3.573199 | 0.166611   | -23.07906 |
| 45.43333 | 3.173243 | 0.1440972  | -23.07906 |
| 45.45    | 3.567248 | 0.1215834  | -23.07906 |
| 45.46667 | 3.454074 | 0.1350917  | -23.07213 |
| 45.48333 | 3.400331 | 0.1531027  | -23.07906 |
| 45.5     | 3.328288 | 0.1080751  | -23.08598 |
| 45.51667 | 3.746717 | 0.1486     | -23.08598 |
| 45.53333 | 3.418524 | 0.1350917  | -23.09291 |
| 45.55    | 3.406073 | 0.1170807  | -23.10677 |
| 45.56667 | 3.483798 | 0.1305889  | -23.12756 |
| 45.58333 | 3.209055 | 0.1395945  | -23.14834 |
| 45.6     | 3.549294 | 0.1035679  | -23.13448 |
| 45.61666 | 3.424296 | 0.1486     | -23.12063 |
| 45.63334 | 3.382204 | 0.1576055  | -23.1137  |
| 45.65    | 3.364196 | 0.1350917  | -23.10677 |
| 45.66667 | 3.782715 | 0.1395945  | -23.09291 |
| 45.68333 | 3.484138 | 0.1080706  | -23.10677 |
| 45.7     | 3.525687 | 0.1395945  | -23.13448 |
| 45.71667 | 3.358335 | 0.1666155  | -23.15527 |
| 45.73333 | 3.388292 | 0.09456238 | -23.16913 |
| 45.75    | 3.358227 | 0.1486     | -23.17605 |
| 45.76667 | 3.382168 | 0.1531072  | -23.16913 |
| 45.78333 | 3.746741 | 0.1350872  | -23.15527 |
| 45.8     | 3.544023 | 0.1486     | -23.12756 |
| 45.81667 | 3.489916 | 0.1260862  | -23.10677 |
| 45.83333 | 3.382323 | 0.08105411 | -23.1137  |
| 45.85    | 3.400092 | 0.1621037  | -23.12063 |
| 45.86666 | 3.220772 | 0.1350917  | -23.12756 |
| 45.88334 | 3.507596 | 0.1125779  | -23.13448 |
| 45.9     | 3.292565 | 0.175621   | -23.14141 |
| 45.91667 | 3.30449  | 0.1305889  | -23.15527 |
| 45.93333 | 3.435923 | 0.1215834  | -23.15527 |
| 45.95    | 3.591481 | 0.1395945  | -23.15527 |
| 45.96667 | 3.280812 | 0.09906514 | -23.17605 |
| 45.98333 | 3.477573 | 0.1305889  | -23.17605 |
| 46       | 3.53171  | 0.1260862  | -23.1622  |
| 46.01667 | 3.603478 | 0.1260862  | -23.13448 |
| 46.03333 | 3.406306 | 0.1080706  | -23.13448 |
| 46.05    | 3.579406 | 0.1260862  | -23.1622  |
| 46.06667 | 3.537828 | 0.1215789  | -23.17605 |
| 46.08333 | 3.316559 | 0.1215834  | -23.16913 |
| 46.1     | 3.651056 | 0.1170762  | -23.1622  |

|          |          |            |           |
|----------|----------|------------|-----------|
| 46.11666 | 3.418363 | 0.1125734  | -23.15527 |
| 46.13334 | 3.507781 | 0.1080706  | -23.1622  |
| 46.15    | 3.430187 | 0.1350872  | -23.17605 |
| 46.16667 | 3.746741 | 0.09005962 | -23.16913 |
| 46.18333 | 3.442315 | 0.1080706  | -23.1622  |
| 46.2     | 3.663142 | 0.08105411 | -23.15527 |
| 46.21667 | 3.448218 | 0.1530982  | -23.16913 |
| 46.23333 | 3.639195 | 0.1260862  | -23.18298 |
| 46.25    | 3.675319 | 0.1125779  | -23.18298 |
| 46.26667 | 3.454223 | 0.1305889  | -23.18298 |
| 46.28333 | 3.382329 | 0.1125734  | -23.18991 |
| 46.3     | 3.519593 | 0.1125734  | -23.18991 |
| 46.31667 | 3.537792 | 0.1125734  | -23.20377 |
| 46.33333 | 3.723015 | 0.1080706  | -23.21763 |
| 46.35    | 3.44219  | 0.09005962 | -23.23148 |
| 46.36666 | 3.722914 | 0.1170807  | -23.25227 |
| 46.38334 | 3.448254 | 0.1395945  | -23.2592  |
| 46.4     | 3.298671 | 0.1080751  | -23.24534 |
| 46.41667 | 3.340231 | 0.1350917  | -23.23841 |
| 46.43333 | 3.549515 | 0.1305889  | -23.23841 |
| 46.45    | 3.579651 | 0.08555687 | -23.24534 |
| 46.46667 | 3.561637 | 0.1486     | -23.25227 |
| 46.48333 | 3.53778  | 0.09906514 | -23.26613 |
| 46.5     | 3.489904 | 0.1215834  | -23.27305 |
| 46.51667 | 3.519814 | 0.1080706  | -23.24534 |
| 46.53333 | 3.519856 | 0.1080706  | -23.23841 |
| 46.55    | 3.430163 | 0.1305844  | -23.24534 |
| 46.56667 | 3.609286 | 0.1035679  | -23.2592  |
| 46.58333 | 3.645421 | 0.1260862  | -23.26613 |
| 46.6     | 3.280794 | 0.1125734  | -23.27305 |
| 46.61666 | 3.382174 | 0.1440972  | -23.27305 |
| 46.63334 | 3.352324 | 0.1170762  | -23.27998 |
| 46.65    | 3.627347 | 0.1170762  | -23.27305 |
| 46.66667 | 3.310644 | 0.09906514 | -23.27305 |
| 46.68333 | 3.53741  | 0.1350917  | -23.27305 |
| 46.7     | 3.478092 | 0.1035679  | -23.2592  |
| 46.71667 | 3.758786 | 0.1486     | -23.25227 |
| 46.73333 | 3.466172 | 0.1440972  | -23.26613 |
| 46.75    | 3.394308 | 0.1440972  | -23.28691 |
| 46.76667 | 3.418076 | 0.1666155  | -23.29384 |
| 46.78333 | 3.274658 | 0.1486045  | -23.29384 |
| 46.8     | 3.698674 | 0.1486     | -23.29384 |
| 46.81667 | 3.717154 | 0.1486     | -23.30077 |
| 46.83333 | 3.496375 | 0.1305889  | -23.29384 |
| 46.85    | 3.453954 | 0.1035679  | -23.27998 |
| 46.86666 | 3.645206 | 0.1170762  | -23.26613 |
| 46.88334 | 3.412412 | 0.1080751  | -23.26613 |

|          |          |            |           |
|----------|----------|------------|-----------|
| 46.9     | 3.340279 | 0.1305889  | -23.26613 |
| 46.91667 | 3.507685 | 0.1080706  | -23.26613 |
| 46.93333 | 3.627282 | 0.1260862  | -23.27998 |
| 46.95    | 3.573688 | 0.1350917  | -23.3077  |
| 46.96667 | 3.388435 | 0.1080751  | -23.32848 |
| 46.98333 | 3.543462 | 0.2161458  | -23.33541 |
| 47       | 3.627383 | 0.1170807  | -23.32848 |
| 47.01667 | 3.466214 | 0.1080706  | -23.32848 |
| 47.03333 | 3.633221 | 0.1531027  | -23.33541 |
| 47.05    | 3.675384 | 0.09906514 | -23.32848 |
| 47.06667 | 3.591606 | 0.1215789  | -23.32155 |
| 47.08333 | 3.663363 | 0.1486     | -23.3077  |
| 47.1     | 3.52598  | 0.1035724  | -23.30077 |
| 47.11666 | 3.734947 | 0.1621082  | -23.28691 |
| 47.13334 | 3.854776 | 0.1395945  | -23.27998 |
| 47.15    | 3.705431 | 0.1486     | -23.29384 |
| 47.16667 | 3.764904 | 0.1531027  | -23.32155 |
| 47.18333 | 3.75918  | 0.1305889  | -23.33541 |
| 47.2     | 3.735126 | 0.1215834  | -23.34234 |
| 47.21667 | 3.669511 | 0.1080706  | -23.32848 |
| 47.23333 | 3.723236 | 0.1486045  | -23.32155 |
| 47.25    | 3.507996 | 0.09456238 | -23.32848 |
| 47.26667 | 3.669213 | 0.1170762  | -23.33541 |
| 47.28333 | 3.830883 | 0.1035679  | -23.34927 |
| 47.3     | 3.914434 | 0.1305844  | -23.34927 |
| 47.31667 | 3.5741   | 0.1395945  | -23.34234 |
| 47.33333 | 3.854507 | 0.09456238 | -23.34927 |
| 47.35    | 3.848795 | 0.1395945  | -23.36313 |
| 47.36666 | 3.574076 | 0.1395945  | -23.38391 |
| 47.38334 | 3.938226 | 0.09906964 | -23.38391 |
| 47.4     | 3.735394 | 0.1350872  | -23.37005 |
| 47.41667 | 3.555991 | 0.1305889  | -23.37698 |
| 47.43333 | 3.705174 | 0.1080706  | -23.37005 |
| 47.45    | 3.424194 | 0.1350917  | -23.3562  |
| 47.46667 | 3.764827 | 0.1666155  | -23.3562  |
| 47.48333 | 3.765023 | 0.1125734  | -23.37005 |
| 47.5     | 3.735389 | 0.1531027  | -23.37005 |
| 47.51667 | 3.705216 | 0.1125779  | -23.37005 |
| 47.53333 | 3.639536 | 0.1035679  | -23.3562  |
| 47.55    | 3.842719 | 0.1215834  | -23.3562  |
| 47.56667 | 3.932549 | 0.1170807  | -23.37698 |
| 47.58333 | 3.550052 | 0.1215789  | -23.38391 |
| 47.6     | 3.543689 | 0.09906964 | -23.38391 |
| 47.61666 | 4.039868 | 0.1305844  | -23.39084 |
| 47.63334 | 3.723713 | 0.09906514 | -23.4047  |
| 47.65    | 3.770968 | 0.1576055  | -23.41163 |
| 47.66667 | 3.741226 | 0.1125779  | -23.4047  |

|          |          |            |           |
|----------|----------|------------|-----------|
| 47.68333 | 3.950444 | 0.1125734  | -23.41163 |
| 47.7     | 3.663554 | 0.1170762  | -23.41855 |
| 47.71667 | 3.645654 | 0.1170762  | -23.41163 |
| 47.73333 | 3.89639  | 0.1395945  | -23.39084 |
| 47.75    | 3.717398 | 0.1080706  | -23.37698 |
| 47.76667 | 3.777039 | 0.1621082  | -23.37698 |
| 47.78333 | 3.998218 | 0.07655136 | -23.39777 |
| 47.8     | 3.74741  | 0.1440972  | -23.4047  |
| 47.81667 | 3.950449 | 0.1350917  | -23.39777 |
| 47.83333 | 4.267422 | 0.1170807  | -23.4047  |
| 47.85    | 3.927118 | 0.1170762  | -23.42548 |
| 47.86666 | 3.72939  | 0.13959    | -23.44627 |
| 47.88334 | 3.884757 | 0.1440972  | -23.44627 |
| 47.9     | 3.866904 | 0.09456238 | -23.44627 |
| 47.91667 | 3.657621 | 0.09005962 | -23.43241 |
| 47.93333 | 3.866463 | 0.1531027  | -23.41855 |
| 47.95    | 3.813197 | 0.1395945  | -23.42548 |
| 47.96667 | 4.046034 | 0.1170807  | -23.44627 |
| 47.98333 | 3.771398 | 0.1395945  | -23.4532  |
| 48       | 3.938434 | 0.1215834  | -23.43934 |
| 48.01667 | 3.968571 | 0.1260817  | -23.43934 |
| 48.03333 | 3.645899 | 0.15761    | -23.4532  |
| 48.05    | 4.057721 | 0.1260862  | -23.47398 |
| 48.06667 | 3.777438 | 0.1260862  | -23.47398 |
| 48.08333 | 3.926389 | 0.08105411 | -23.4532  |
| 48.1     | 4.207752 | 0.1215789  | -23.44627 |
| 48.11666 | 3.807462 | 0.1215834  | -23.4532  |
| 48.13334 | 3.824848 | 0.1440972  | -23.48091 |
| 48.15    | 3.842916 | 0.1215834  | -23.5017  |
| 48.16667 | 3.884823 | 0.1621082  | -23.48784 |
| 48.18333 | 3.854776 | 0.1080751  | -23.48091 |
| 48.2     | 3.944642 | 0.166611   | -23.48784 |
| 48.21667 | 3.980544 | 0.1170807  | -23.49477 |
| 48.23333 | 3.998456 | 0.1531027  | -23.48784 |
| 48.25    | 3.962686 | 0.09906514 | -23.48784 |
| 48.26667 | 3.902783 | 0.1260817  | -23.48091 |
| 48.28333 | 3.843191 | 0.1080706  | -23.46705 |
| 48.3     | 4.081954 | 0.1350917  | -23.48091 |
| 48.31667 | 4.177729 | 0.1350917  | -23.48784 |
| 48.33333 | 3.789591 | 0.09456238 | -23.48091 |
| 48.35    | 4.099801 | 0.1440927  | -23.47398 |
| 48.36666 | 4.064435 | 0.1440972  | -23.48091 |
| 48.38334 | 3.938888 | 0.1080751  | -23.48091 |
| 48.4     | 3.980479 | 0.1440972  | -23.46705 |
| 48.41667 | 3.926807 | 0.1350917  | -23.46705 |
| 48.43333 | 4.028193 | 0.09456238 | -23.48091 |
| 48.45    | 3.986597 | 0.1125779  | -23.49477 |

|          |          |            |           |
|----------|----------|------------|-----------|
| 48.46667 | 3.920761 | 0.1260817  | -23.5017  |
| 48.48333 | 4.01046  | 0.09005962 | -23.49477 |
| 48.5     | 4.14804  | 0.1801192  | -23.48091 |
| 48.51667 | 4.00458  | 0.1080751  | -23.46705 |
| 48.53333 | 3.890798 | 0.1531027  | -23.46013 |
| 48.55    | 4.213619 | 0.1440972  | -23.46705 |
| 48.56667 | 4.17222  | 0.1080706  | -23.48784 |
| 48.58333 | 3.801373 | 0.1621127  | -23.5017  |
| 48.6     | 3.950408 | 0.09906514 | -23.50863 |
| 48.61666 | 4.327193 | 0.1215834  | -23.49477 |
| 48.63334 | 4.136485 | 0.1486     | -23.48784 |
| 48.65    | 3.903111 | 0.1305889  | -23.49477 |
| 48.66667 | 4.070153 | 0.1170807  | -23.5017  |
| 48.68333 | 3.932806 | 0.0720486  | -23.51555 |
| 48.7     | 4.100039 | 0.1305889  | -23.54327 |
| 48.71667 | 3.962668 | 0.1215834  | -23.55713 |
| 48.73333 | 3.93277  | 0.1395945  | -23.55713 |
| 48.75    | 3.992392 | 0.1531027  | -23.5502  |
| 48.76667 | 4.243565 | 0.1440972  | -23.54327 |
| 48.78333 | 4.226088 | 0.1260862  | -23.53634 |
| 48.8     | 4.082431 | 0.1486     | -23.52941 |
| 48.81667 | 3.968762 | 0.1260862  | -23.53634 |
| 48.83333 | 4.076272 | 0.1260862  | -23.54327 |
| 48.85    | 4.231645 | 0.175621   | -23.54327 |
| 48.86666 | 4.136317 | 0.1305889  | -23.54327 |
| 48.88334 | 4.17801  | 0.1621082  | -23.54327 |
| 48.9     | 3.933033 | 0.1170807  | -23.53634 |
| 48.91667 | 4.052176 | 0.1440972  | -23.53634 |
| 48.93333 | 3.831247 | 0.1305844  | -23.54327 |
| 48.95    | 3.86078  | 0.1486045  | -23.54327 |
| 48.96667 | 4.249479 | 0.1080706  | -23.5502  |
| 48.98333 | 3.855247 | 0.1260862  | -23.57791 |
| 49       | 4.046237 | 0.1035679  | -23.58484 |
| 49.01667 | 4.255633 | 0.1395945  | -23.59177 |
| 49.03333 | 4.309621 | 0.1350917  | -23.60563 |
| 49.05    | 3.963008 | 0.1215834  | -23.5987  |
| 49.06667 | 4.171718 | 0.1666155  | -23.57098 |
| 49.08333 | 4.076409 | 0.1035724  | -23.55713 |
| 49.1     | 4.219749 | 0.1215789  | -23.57791 |
| 49.11666 | 3.909181 | 0.1440972  | -23.61255 |
| 49.13334 | 4.159811 | 0.1215789  | -23.62641 |
| 49.15    | 4.21991  | 0.1170762  | -23.61948 |
| 49.16667 | 4.208098 | 0.1035679  | -23.63334 |
| 49.18333 | 4.15417  | 0.09456238 | -23.62641 |
| 49.2     | 4.267744 | 0.1215789  | -23.5987  |
| 49.21667 | 4.064626 | 0.1305889  | -23.5987  |
| 49.23333 | 3.926843 | 0.09906514 | -23.61255 |

|          |          |            |           |
|----------|----------|------------|-----------|
| 49.25    | 4.010304 | 0.1215789  | -23.61255 |
| 49.26667 | 4.076218 | 0.1350917  | -23.59177 |
| 49.28333 | 4.034538 | 0.1621082  | -23.59177 |
| 49.3     | 3.932752 | 0.1531027  | -23.60563 |
| 49.31667 | 4.100183 | 0.1666155  | -23.61255 |
| 49.33333 | 4.171766 | 0.1305889  | -23.60563 |
| 49.35    | 3.897125 | 0.1035679  | -23.61255 |
| 49.36666 | 4.392969 | 0.08555687 | -23.61948 |
| 49.38334 | 4.429438 | 0.1621082  | -23.62641 |
| 49.4     | 3.999071 | 0.1215834  | -23.62641 |
| 49.41667 | 3.980628 | 0.09456238 | -23.61948 |
| 49.43333 | 4.087952 | 0.1035679  | -23.61255 |
| 49.45    | 4.160127 | 0.1035679  | -23.60563 |
| 49.46667 | 4.142137 | 0.1035679  | -23.59177 |
| 49.48333 | 4.237858 | 0.1440972  | -23.61255 |
| 49.5     | 4.172202 | 0.1305889  | -23.63334 |
| 49.51667 | 4.148118 | 0.1215834  | -23.64027 |
| 49.53333 | 4.435109 | 0.1531027  | -23.6472  |
| 49.55    | 4.017019 | 0.1846265  | -23.65413 |
| 49.56667 | 4.273432 | 0.1125779  | -23.66105 |
| 49.58333 | 3.998838 | 0.1125734  | -23.65413 |
| 49.6     | 4.064364 | 0.2071403  | -23.62641 |
| 49.61666 | 4.100176 | 0.1350917  | -23.60563 |
| 49.63334 | 4.135911 | 0.1486     | -23.61948 |
| 49.65    | 4.249891 | 0.1486     | -23.63334 |
| 49.66667 | 4.231884 | 0.1305889  | -23.64027 |
| 49.68333 | 4.118477 | 0.09906514 | -23.64027 |
| 49.7     | 4.11218  | 0.1215789  | -23.63334 |
| 49.71667 | 4.142095 | 0.1260862  | -23.62641 |
| 49.73333 | 4.130342 | 0.1215834  | -23.62641 |
| 49.75    | 4.464893 | 0.09906514 | -23.64027 |
| 49.76667 | 4.100726 | 0.175621   | -23.6472  |
| 49.78333 | 4.094291 | 0.175621   | -23.6472  |
| 49.8     | 3.998552 | 0.1305889  | -23.65413 |
| 49.81667 | 4.094291 | 0.1531027  | -23.67491 |
| 49.83333 | 4.327223 | 0.1486     | -23.67491 |
| 49.85    | 4.100534 | 0.1395945  | -23.66798 |
| 49.86666 | 4.088388 | 0.1440972  | -23.6472  |
| 49.88334 | 3.783407 | 0.1170807  | -23.61948 |
| 49.9     | 4.099806 | 0.1846265  | -23.5987  |
| 49.91667 | 4.088299 | 0.1395945  | -23.60563 |
| 49.93333 | 4.118304 | 0.1711182  | -23.62641 |
| 49.95    | 3.992601 | 0.1125779  | -23.62641 |
| 49.96667 | 4.010442 | 0.166611   | -23.60563 |
| 49.98333 | 4.261333 | 0.1350917  | -23.5987  |
| 50       | 4.016972 | 0.1215789  | -23.61255 |
| 50.01667 | 4.249497 | 0.1395945  | -23.64027 |



|          |          |           |           |
|----------|----------|-----------|-----------|
| 50.03333 | 3.837461 | 0.1531072 | -23.6472  |
| 50.05    | 4.159763 | 0.1260862 | -23.67491 |
| 50.06667 | 4.070487 | 0.166611  | -23.70263 |
| 50.08333 | 4.44698  | 0.1486    | -23.70263 |
| 50.1     | 4.345804 | 0.1395945 | -23.70955 |
| 50.11666 | 4.130492 | 0.15761   | -23.71648 |
| 50.13334 | 4.309484 | 0.1576055 | -23.68877 |
| 50.15    | 4.231931 | 0.1350917 | -23.67491 |
| 50.16667 | 4.076594 | 0.1305889 | -23.68877 |
| 50.18333 | 4.345195 | 0.1215834 | -23.70263 |
| 50.2     | 4.357682 | 0.1125779 | -23.70955 |
| 50.21667 | 4.17222  | 0.166611  | -23.70955 |
| 50.23333 | 4.423261 | 0.1080751 | -23.70955 |
| 50.25    | 4.465484 | 0.1395945 | -23.70955 |
| 50.26667 | 4.339847 | 0.1440972 | -23.70955 |
| 50.28333 | 3.891287 | 0.1125734 | -23.70955 |
| 50.3     | 4.356941 | 0.1350917 | -23.71648 |
| 50.31667 | 4.190335 | 0.1125779 | -23.70955 |
| 50.33333 | 4.160061 | 0.166611  | -23.71648 |
| 50.35    | 4.237834 | 0.1305889 | -23.73727 |
| 50.36666 | 4.17826  | 0.1350917 | -23.7442  |
| 50.38334 | 4.136096 | 0.1350917 | -23.7442  |
| 50.4     | 4.207919 | 0.1440972 | -23.73727 |
| 50.41667 | 4.118286 | 0.1350917 | -23.7442  |
| 50.43333 | 3.998624 | 0.1260817 | -23.7442  |
| 50.45    | 4.423046 | 0.1080751 | -23.75805 |
| 50.46667 | 4.178284 | 0.1576055 | -23.75805 |
| 50.48333 | 4.375343 | 0.1576055 | -23.75805 |
| 50.5     | 4.268096 | 0.1260862 | -23.73727 |
| 50.51667 | 4.028641 | 0.1350917 | -23.70955 |
| 50.53333 | 4.273522 | 0.1531027 | -23.70955 |
| 50.55    | 4.100553 | 0.166611  | -23.72341 |
| 50.56667 | 4.070422 | 0.1305889 | -23.73034 |
| 50.58333 | 4.052408 | 0.1080751 | -23.7442  |
| 50.6     | 4.123992 | 0.1576055 | -23.75805 |
| 50.61666 | 4.315691 | 0.1305889 | -23.75805 |
| 50.63334 | 4.166179 | 0.1125734 | -23.75805 |
| 50.65    | 4.285609 | 0.1260862 | -23.76498 |
| 50.66667 | 4.148177 | 0.1170807 | -23.77884 |
| 50.68333 | 4.321624 | 0.1486    | -23.77884 |
| 50.7     | 4.303795 | 0.1440972 | -23.77884 |
| 50.71667 | 4.220239 | 0.1486    | -23.7927  |
| 50.73333 | 4.536745 | 0.1080706 | -23.79963 |
| 50.75    | 4.363781 | 0.1621082 | -23.80655 |
| 50.76667 | 4.506985 | 0.1260862 | -23.80655 |
| 50.78333 | 4.310224 | 0.1215834 | -23.82734 |
| 50.8     | 4.190138 | 0.1260817 | -23.8412  |

|          |          |            |           |
|----------|----------|------------|-----------|
| 50.81667 | 4.16024  | 0.1666155  | -23.81348 |
| 50.83333 | 4.375379 | 0.1621127  | -23.78577 |
| 50.85    | 4.303771 | 0.1486     | -23.7927  |
| 50.86666 | 4.393638 | 0.1486     | -23.78577 |
| 50.88334 | 4.207919 | 0.1395945  | -23.7927  |
| 50.9     | 4.040817 | 0.09005962 | -23.81348 |
| 50.91667 | 4.45286  | 0.1486     | -23.83427 |
| 50.93333 | 4.310045 | 0.1486045  | -23.8412  |
| 50.95    | 3.89722  | 0.1666155  | -23.84813 |
| 50.96667 | 4.195581 | 0.1666155  | -23.8412  |
| 50.98333 | 4.506788 | 0.1215834  | -23.83427 |
| 51       | 4.244424 | 0.1305889  | -23.84813 |
| 51.01667 | 4.279735 | 0.1125734  | -23.85505 |
| 51.03333 | 4.429235 | 0.1125734  | -23.82734 |
| 51.05    | 4.010967 | 0.1486     | -23.80655 |
| 51.06667 | 4.189857 | 0.1305889  | -23.81348 |
| 51.08333 | 4.327652 | 0.1621127  | -23.82041 |
| 51.1     | 4.178117 | 0.175621   | -23.8412  |
| 51.11666 | 4.088418 | 0.1801238  | -23.87584 |
| 51.13334 | 4.405229 | 0.1125779  | -23.88277 |
| 51.15    | 4.004986 | 0.1260817  | -23.86198 |
| 51.16667 | 4.177866 | 0.1666155  | -23.84813 |
| 51.18333 | 4.172052 | 0.166611   | -23.83427 |
| 51.2     | 4.554735 | 0.1350917  | -23.83427 |
| 51.21667 | 4.28614  | 0.1621127  | -23.83427 |
| 51.23333 | 4.046684 | 0.1080706  | -23.85505 |
| 51.25    | 4.291577 | 0.1125734  | -23.86198 |
| 51.26667 | 4.24979  | 0.1395945  | -23.86891 |
| 51.28333 | 4.542953 | 0.1395945  | -23.88277 |
| 51.3     | 4.011164 | 0.1305889  | -23.90355 |
| 51.31667 | 4.117993 | 0.09456238 | -23.90355 |
| 51.33333 | 4.506686 | 0.1440972  | -23.89663 |
| 51.35    | 4.417668 | 0.09005962 | -23.89663 |
| 51.36666 | 4.298012 | 0.1215789  | -23.90355 |
| 51.38334 | 4.417166 | 0.1440972  | -23.91741 |
| 51.4     | 4.303867 | 0.1350917  | -23.9382  |
| 51.41667 | 4.190257 | 0.1035679  | -23.95205 |
| 51.43333 | 4.518922 | 0.1350917  | -23.94513 |
| 51.45    | 4.00507  | 0.1305889  | -23.93127 |
| 51.46667 | 4.141916 | 0.1260862  | -23.91048 |
| 51.48333 | 4.63255  | 0.1080706  | -23.90355 |
| 51.5     | 4.369959 | 0.1035679  | -23.89663 |
| 51.51667 | 4.094488 | 0.1305889  | -23.89663 |
| 51.53333 | 4.423088 | 0.09456238 | -23.90355 |
| 51.55    | 3.867555 | 0.1305844  | -23.91048 |
| 51.56667 | 4.177639 | 0.1395945  | -23.91741 |
| 51.58333 | 4.464994 | 0.1486045  | -23.93127 |

|          |          |            |           |
|----------|----------|------------|-----------|
| 51.6     | 4.238246 | 0.1035679  | -23.94513 |
| 51.61666 | 4.220131 | 0.15761    | -23.95205 |
| 51.63334 | 4.190042 | 0.1260817  | -23.96591 |
| 51.65    | 4.465084 | 0.1305889  | -23.97284 |
| 51.66667 | 4.375683 | 0.1576055  | -23.95898 |
| 51.68333 | 4.124457 | 0.1170807  | -23.9382  |
| 51.7     | 4.195856 | 0.1260862  | -23.9382  |
| 51.71667 | 4.495142 | 0.1711182  | -23.97284 |
| 51.73333 | 4.00501  | 0.1350917  | -23.99363 |
| 51.75    | 4.476771 | 0.1215834  | -24.00056 |
| 51.76667 | 4.112681 | 0.1125734  | -24.00056 |
| 51.78333 | 4.022564 | 0.1395945  | -23.99363 |
| 51.8     | 4.411102 | 0.1395945  | -23.97284 |
| 51.81667 | 4.238103 | 0.1305889  | -23.95205 |
| 51.83333 | 4.243863 | 0.1621082  | -23.95898 |
| 51.85    | 4.56681  | 0.1260862  | -23.96591 |
| 51.86666 | 4.346156 | 0.1170762  | -23.99363 |
| 51.88334 | 4.124326 | 0.09456238 | -24.01441 |
| 51.9     | 3.789412 | 0.1170807  | -24.00056 |
| 51.91667 | 4.20161  | 0.1305844  | -23.95898 |
| 51.93333 | 4.393256 | 0.1531027  | -23.94513 |
| 51.95    | 4.339704 | 0.1666155  | -23.97284 |
| 51.96667 | 4.525034 | 0.1260862  | -24.00056 |
| 51.98333 | 4.339871 | 0.1215834  | -24.02134 |
| 52       | 4.124487 | 0.1395945  | -24.02134 |
| 52.01667 | 4.231806 | 0.175621   | -24.00748 |
| 52.03333 | 4.495059 | 0.1846265  | -24.00056 |
| 52.05    | 4.357759 | 0.1170807  | -24.00748 |
| 52.06667 | 4.339769 | 0.1531027  | -24.02827 |
| 52.08333 | 4.232087 | 0.1215834  | -24.02827 |
| 52.1     | 3.992768 | 0.15761    | -24.00748 |
| 52.11666 | 4.183871 | 0.1395945  | -23.99363 |
| 52.13334 | 4.405324 | 0.1350917  | -24.00748 |
| 52.15    | 4.202272 | 0.1440972  | -24.02134 |
| 52.16667 | 4.423088 | 0.09906514 | -24.04213 |
| 52.18333 | 4.405635 | 0.1440972  | -24.05598 |
| 52.2     | 4.321791 | 0.15761    | -24.04906 |
| 52.21667 | 3.956961 | 0.1531027  | -24.02827 |
| 52.23333 | 4.261829 | 0.0720486  | -24.02134 |
| 52.25    | 4.399039 | 0.1350917  | -24.00748 |
| 52.26667 | 4.25016  | 0.13959    | -24.00056 |
| 52.28333 | 4.357592 | 0.175621   | -23.99363 |
| 52.3     | 4.196196 | 0.1756255  | -24.00748 |
| 52.31667 | 4.202004 | 0.09456238 | -24.0352  |
| 52.33333 | 4.02867  | 0.1350872  | -24.04906 |
| 52.35    | 4.596254 | 0.1395945  | -24.05598 |
| 52.36666 | 4.118841 | 0.1440972  | -24.06291 |

|          |          |            |           |
|----------|----------|------------|-----------|
| 52.38334 | 4.225652 | 0.1305889  | -24.05598 |
| 52.4     | 4.315763 | 0.1080706  | -24.02134 |
| 52.41667 | 4.351599 | 0.1305844  | -24.01441 |
| 52.43333 | 4.016751 | 0.175621   | -24.04213 |
| 52.45    | 4.363173 | 0.1440972  | -24.04906 |
| 52.46667 | 4.076773 | 0.175621   | -24.0352  |
| 52.48333 | 4.004527 | 0.1621127  | -24.0352  |
| 52.5     | 4.446939 | 0.1080751  | -24.04906 |
| 52.51667 | 4.459437 | 0.1530982  | -24.04906 |
| 52.53333 | 4.35179  | 0.1125779  | -24.06291 |
| 52.55    | 4.309699 | 0.1621082  | -24.09063 |
| 52.56667 | 4.375582 | 0.1440972  | -24.09063 |
| 52.58333 | 4.250052 | 0.1260862  | -24.09063 |
| 52.6     | 4.178159 | 0.1395945  | -24.10448 |
| 52.61666 | 4.046452 | 0.1395945  | -24.11141 |
| 52.63334 | 4.429122 | 0.1080706  | -24.09756 |
| 52.65    | 4.112574 | 0.1170762  | -24.07677 |
| 52.66667 | 4.010555 | 0.1486     | -24.06984 |
| 52.68333 | 4.130092 | 0.08105411 | -24.0837  |
| 52.7     | 4.381294 | 0.1576055  | -24.11141 |
| 52.71667 | 4.255902 | 0.1531072  | -24.12527 |
| 52.73333 | 4.303771 | 0.175621   | -24.11141 |
| 52.75    | 4.333675 | 0.1350917  | -24.11141 |
| 52.76667 | 4.046792 | 0.1080751  | -24.11834 |
| 52.78333 | 4.225539 | 0.1485955  | -24.11141 |
| 52.8     | 4.238145 | 0.1305889  | -24.11834 |
| 52.81667 | 4.160204 | 0.1215834  | -24.13913 |
| 52.83333 | 4.291523 | 0.1305889  | -24.12527 |
| 52.85    | 4.142436 | 0.09906514 | -24.11141 |
| 52.86666 | 3.986638 | 0.1170762  | -24.14605 |
| 52.88334 | 4.345273 | 0.1080706  | -24.15991 |
| 52.9     | 4.148326 | 0.13959    | -24.15298 |
| 52.91667 | 4.118316 | 0.166611   | -24.16684 |
| 52.93333 | 4.124147 | 0.1260862  | -24.15991 |
| 52.95    | 4.184085 | 0.0720486  | -24.15298 |
| 52.96667 | 3.897023 | 0.1080706  | -24.15991 |
| 52.98333 | 4.075967 | 0.1305889  | -24.15298 |
| 53       | 4.18396  | 0.1260862  | -24.15991 |
| 53.01667 | 4.363423 | 0.1260862  | -24.15298 |
| 53.03333 | 3.993162 | 0.1215834  | -24.14605 |
| 53.05    | 4.165738 | 0.1305889  | -24.15991 |
| 53.06667 | 4.566607 | 0.1440972  | -24.19455 |
| 53.08333 | 4.160801 | 0.1486     | -24.20148 |
| 53.1     | 4.201801 | 0.1305889  | -24.20148 |
| 53.11666 | 4.285806 | 0.08555687 | -24.19455 |
| 53.13334 | 4.26781  | 0.1531027  | -24.20148 |
| 53.15    | 4.190156 | 0.1531072  | -24.20148 |

|          |          |            |           |
|----------|----------|------------|-----------|
| 53.16667 | 3.962954 | 0.1395945  | -24.20148 |
| 53.18333 | 4.33324  | 0.1215834  | -24.19455 |
| 53.2     | 4.106497 | 0.1621082  | -24.19455 |
| 53.21667 | 4.321558 | 0.08105411 | -24.21534 |
| 53.23333 | 4.309639 | 0.08555687 | -24.23613 |
| 53.25    | 3.783747 | 0.1440972  | -24.24998 |
| 53.26667 | 4.147652 | 0.1350917  | -24.2777  |
| 53.28333 | 4.171933 | 0.1440972  | -24.29155 |
| 53.3     | 4.178212 | 0.09456238 | -24.28463 |
| 53.31667 | 4.225724 | 0.1035679  | -24.28463 |
| 53.33333 | 4.202249 | 0.1395945  | -24.29848 |
| 53.35    | 3.87917  | 0.1395945  | -24.28463 |
| 53.36666 | 4.153794 | 0.1891293  | -24.27077 |
| 53.38334 | 3.914846 | 0.1350917  | -24.27077 |
| 53.4     | 4.100093 | 0.08555687 | -24.2777  |
| 53.41667 | 4.052629 | 0.09906514 | -24.2777  |
| 53.43333 | 4.351486 | 0.1035679  | -24.25691 |
| 53.45    | 4.02263  | 0.166611   | -24.24305 |
| 53.46667 | 4.100242 | 0.08555687 | -24.25691 |
| 53.48333 | 3.998552 | 0.1215834  | -24.27077 |
| 53.5     | 4.249504 | 0.1305889  | -24.26384 |
| 53.51667 | 4.363501 | 0.1531027  | -24.24998 |
| 53.53333 | 4.082706 | 0.166611   | -24.24305 |
| 53.55    | 4.040399 | 0.1305889  | -24.22227 |
| 53.56667 | 4.267661 | 0.1305889  | -24.2292  |
| 53.58333 | 3.986788 | 0.1125734  | -24.23613 |
| 53.6     | 4.106169 | 0.1395945  | -24.24305 |
| 53.61666 | 4.16597  | 0.1215834  | -24.24998 |
| 53.63334 | 3.873094 | 0.1486     | -24.27077 |
| 53.65    | 4.093975 | 0.1440972  | -24.26384 |
| 53.66667 | 3.944976 | 0.06754585 | -24.24305 |
| 53.68333 | 4.159685 | 0.08555687 | -24.22227 |
| 53.7     | 4.166263 | 0.1621082  | -24.20148 |
| 53.71667 | 4.279646 | 0.1350917  | -24.1807  |
| 53.73333 | 4.190197 | 0.1440972  | -24.1807  |
| 53.75    | 3.944815 | 0.1621082  | -24.19455 |
| 53.76667 | 3.813102 | 0.1666155  | -24.20841 |
| 53.78333 | 4.159727 | 0.1170807  | -24.20148 |
| 53.8     | 3.926968 | 0.1350872  | -24.19455 |
| 53.81667 | 4.297224 | 0.1395945  | -24.19455 |
| 53.83333 | 4.220197 | 0.1080706  | -24.1807  |
| 53.85    | 3.717667 | 0.1350917  | -24.17377 |
| 53.86666 | 3.878615 | 0.1576055  | -24.1807  |
| 53.88334 | 4.08806  | 0.1305889  | -24.18763 |
| 53.9     | 4.195916 | 0.1170807  | -24.17377 |
| 53.91667 | 3.950802 | 0.1035679  | -24.15298 |
| 53.93333 | 3.723552 | 0.1756165  | -24.14605 |

|          |          |            |           |
|----------|----------|------------|-----------|
| 53.95    | 4.285143 | 0.1440972  | -24.14605 |
| 53.96667 | 3.933074 | 0.1305889  | -24.15298 |
| 53.98333 | 3.968571 | 0.1305889  | -24.16684 |
| 54       | 4.022403 | 0.1260817  | -24.17377 |
| 54.01667 | 4.004592 | 0.1215834  | -24.17377 |
| 54.03333 | 3.885056 | 0.1486     | -24.14605 |
| 54.05    | 4.189631 | 0.1440972  | -24.11834 |
| 54.06667 | 3.825439 | 0.1125779  | -24.11141 |
| 54.08333 | 4.028181 | 0.1711137  | -24.09756 |
| 54.1     | 3.836917 | 0.1350917  | -24.09063 |
| 54.11666 | 3.902896 | 0.1170762  | -24.07677 |
| 54.13334 | 3.944529 | 0.1531027  | -24.05598 |
| 54.15    | 3.968446 | 0.1531027  | -24.06291 |
| 54.16667 | 3.98058  | 0.1531027  | -24.07677 |
| 54.18333 | 4.201807 | 0.1395945  | -24.0837  |
| 54.2     | 4.136096 | 0.1711182  | -24.07677 |
| 54.21667 | 3.938936 | 0.1711182  | -24.06291 |
| 54.23333 | 4.285316 | 0.1440972  | -24.06291 |
| 54.25    | 4.070673 | 0.1215834  | -24.04906 |
| 54.26667 | 4.243773 | 0.1440972  | -24.04213 |
| 54.28333 | 4.375284 | 0.1260862  | -24.04906 |
| 54.3     | 4.05288  | 0.1711182  | -24.0352  |
| 54.31667 | 4.034431 | 0.1711182  | -24.02134 |
| 54.33333 | 4.118172 | 0.1125779  | -24.02827 |
| 54.35    | 3.855158 | 0.1170762  | -24.0352  |
| 54.36666 | 4.123777 | 0.1395945  | -24.01441 |
| 54.38334 | 4.046618 | 0.1260862  | -23.9867  |
| 54.4     | 3.759258 | 0.08555687 | -23.97977 |
| 54.41667 | 3.860846 | 0.1170762  | -23.97977 |
| 54.43333 | 3.968469 | 0.1621082  | -23.9867  |
| 54.45    | 4.082067 | 0.1981393  | -23.9867  |
| 54.46667 | 4.076397 | 0.1350917  | -23.96591 |
| 54.48333 | 3.938643 | 0.1395945  | -23.9382  |
| 54.5     | 3.908835 | 0.1125779  | -23.91048 |
| 54.51667 | 3.950665 | 0.09456238 | -23.90355 |
| 54.53333 | 4.261393 | 0.1305889  | -23.8897  |
| 54.55    | 3.974969 | 0.1080706  | -23.85505 |
| 54.56667 | 4.279425 | 0.08555687 | -23.8412  |
| 54.58333 | 4.016667 | 0.1170762  | -23.86198 |
| 54.6     | 3.992583 | 0.1531027  | -23.87584 |
| 54.61666 | 4.022314 | 0.1305889  | -23.86891 |
| 54.63334 | 4.022499 | 0.1215789  | -23.86891 |
| 54.65    | 3.96866  | 0.1395945  | -23.86891 |
| 54.66667 | 4.124033 | 0.1395945  | -23.86891 |
| 54.68333 | 3.891138 | 0.1350917  | -23.84813 |
| 54.7     | 3.878812 | 0.08555687 | -23.82734 |
| 54.71667 | 3.890833 | 0.1531027  | -23.79963 |

|          |          |            |           |
|----------|----------|------------|-----------|
| 54.73333 | 3.920671 | 0.1035724  | -23.77191 |
| 54.75    | 3.884805 | 0.1215789  | -23.76498 |
| 54.76667 | 3.854854 | 0.1440972  | -23.75805 |
| 54.78333 | 3.908614 | 0.1395945  | -23.7442  |
| 54.8     | 4.183912 | 0.1531027  | -23.72341 |
| 54.81667 | 3.914959 | 0.1305889  | -23.70955 |
| 54.83333 | 3.819047 | 0.1891293  | -23.70955 |
| 54.85    | 3.729366 | 0.1531072  | -23.70955 |
| 54.86666 | 4.15959  | 0.1170807  | -23.68877 |
| 54.88334 | 4.010597 | 0.08105411 | -23.66105 |
| 54.9     | 3.944767 | 0.09456238 | -23.63334 |
| 54.91667 | 3.920689 | 0.09005962 | -23.63334 |
| 54.93333 | 3.902759 | 0.1395945  | -23.64027 |
| 54.95    | 3.699582 | 0.09906514 | -23.64027 |
| 54.96667 | 3.914356 | 0.1215789  | -23.61948 |
| 54.98333 | 3.609996 | 0.08105411 | -23.57791 |
| 55       | 3.788898 | 0.1711137  | -23.55713 |
| 55.01667 | 3.729145 | 0.1801238  | -23.57791 |
| 55.03333 | 3.818969 | 0.1170807  | -23.60563 |
| 55.05    | 4.285197 | 0.1215834  | -23.58484 |
| 55.06667 | 3.921125 | 0.1125734  | -23.53634 |
| 55.08333 | 3.926634 | 0.1305889  | -23.48784 |
| 55.1     | 4.315291 | 0.09005962 | -23.47398 |
| 55.11666 | 3.98699  | 0.1260817  | -23.4532  |
| 55.13334 | 3.902837 | 0.1486     | -23.43241 |
| 55.15    | 4.177717 | 0.1260862  | -23.43241 |
| 55.16667 | 3.646125 | 0.1350917  | -23.43934 |
| 55.18333 | 3.872593 | 0.1125734  | -23.41855 |
| 55.2     | 3.717243 | 0.1440972  | -23.37698 |
| 55.21667 | 3.651628 | 0.1350917  | -23.3562  |
| 55.23333 | 3.794814 | 0.1125734  | -23.34234 |
| 55.25    | 3.992291 | 0.1305889  | -23.31463 |
| 55.26667 | 3.711555 | 0.1305889  | -23.28691 |
| 55.28333 | 3.812827 | 0.1125734  | -23.25227 |
| 55.3     | 3.890696 | 0.1305889  | -23.22455 |
| 55.31667 | 3.657627 | 0.1395945  | -23.20377 |
| 55.33333 | 3.824783 | 0.1080706  | -23.15527 |
| 55.35    | 3.950414 | 0.1531027  | -23.1137  |
| 55.36666 | 3.96259  | 0.1531072  | -23.09291 |
| 55.38334 | 3.92673  | 0.1260817  | -23.07213 |
| 55.4     | 4.016339 | 0.1125734  | -23.05134 |
| 55.41667 | 3.699683 | 0.1486     | -23.02363 |
| 55.43333 | 4.010155 | 0.08555687 | -22.98206 |
| 55.45    | 4.046416 | 0.1260817  | -22.94741 |
| 55.46667 | 3.861007 | 0.1215834  | -22.93356 |
| 55.48333 | 4.147759 | 0.1531027  | -22.91277 |
| 55.5     | 3.789406 | 0.1125734  | -22.88506 |

|          |          |            |           |
|----------|----------|------------|-----------|
| 55.51667 | 3.998409 | 0.1170807  | -22.84348 |
| 55.53333 | 3.681705 | 0.1170762  | -22.82963 |
| 55.55    | 3.597647 | 0.1440972  | -22.80884 |
| 55.56667 | 3.657382 | 0.1260862  | -22.78113 |
| 55.58333 | 3.860703 | 0.1350872  | -22.73956 |
| 55.6     | 3.836917 | 0.09906514 | -22.69106 |
| 55.61666 | 3.633651 | 0.1486     | -22.64256 |
| 55.63334 | 3.902514 | 0.1215834  | -22.60098 |
| 55.65    | 3.986453 | 0.1305844  | -22.55248 |
| 55.66667 | 3.801332 | 0.1170807  | -22.51784 |
| 55.68333 | 3.896533 | 0.09906514 | -22.50398 |
| 55.7     | 3.789245 | 0.1305844  | -22.49706 |
| 55.71667 | 4.06391  | 0.1440972  | -22.4832  |
| 55.73333 | 3.998719 | 0.1305889  | -22.46934 |
| 55.75    | 3.580009 | 0.1305889  | -22.4347  |
| 55.76667 | 4.057768 | 0.09005962 | -22.41391 |
| 55.78333 | 3.885098 | 0.1080706  | -22.3862  |
| 55.8     | 3.890869 | 0.1215789  | -22.35155 |
| 55.81667 | 3.621647 | 0.1711182  | -22.31691 |
| 55.83333 | 3.938273 | 0.1711182  | -22.2892  |
| 55.85    | 3.771374 | 0.1305889  | -22.28227 |
| 55.86666 | 3.705348 | 0.1215834  | -22.26148 |
| 55.88334 | 3.932436 | 0.07655136 | -22.2407  |
| 55.9     | 3.771249 | 0.1440927  | -22.2407  |
| 55.91667 | 3.753181 | 0.09005962 | -22.24763 |
| 55.93333 | 3.806984 | 0.1035679  | -22.2407  |
| 55.95    | 3.842892 | 0.1486     | -22.23377 |
| 55.96667 | 3.765167 | 0.1035724  | -22.2407  |
| 55.98333 | 3.526033 | 0.1080706  | -22.23377 |
| 56       | 3.663136 | 0.08105411 | -22.21298 |
| 56.01667 | 3.872706 | 0.1576055  | -22.21991 |
| 56.03333 | 4.100027 | 0.1260862  | -22.21991 |
| 56.05    | 3.705664 | 0.1486     | -22.20605 |
| 56.06667 | 3.777009 | 0.1440972  | -22.20605 |
| 56.08333 | 3.538162 | 0.1305889  | -22.21298 |
| 56.1     | 3.830411 | 0.1170807  | -22.22684 |
| 56.11666 | 3.651718 | 0.1350872  | -22.2407  |
| 56.13334 | 3.806811 | 0.1395945  | -22.27534 |
| 56.15    | 3.884721 | 0.09456238 | -22.28227 |
| 56.16667 | 3.950461 | 0.09906514 | -22.28227 |
| 56.18333 | 4.094142 | 0.1531027  | -22.27534 |
| 56.2     | 3.813275 | 0.1125779  | -22.2892  |
| 56.21667 | 3.896689 | 0.1305889  | -22.31691 |
| 56.23333 | 3.932746 | 0.15761    | -22.34463 |
| 56.25    | 3.723367 | 0.139599   | -22.36541 |
| 56.26667 | 3.681407 | 0.1125779  | -22.39313 |
| 56.28333 | 3.681401 | 0.1260817  | -22.42084 |



|          |          |            |           |
|----------|----------|------------|-----------|
| 56.3     | 3.938411 | 0.1125779  | -22.44855 |
| 56.31667 | 3.729455 | 0.1440972  | -22.4832  |
| 56.33333 | 3.621606 | 0.1440972  | -22.50398 |
| 56.35    | 3.597593 | 0.1170762  | -22.50398 |
| 56.36666 | 4.003912 | 0.09456238 | -22.51091 |
| 56.38334 | 3.897071 | 0.08555687 | -22.52477 |
| 56.4     | 3.89075  | 0.1215789  | -22.55941 |
| 56.41667 | 3.65173  | 0.1215834  | -22.60098 |
| 56.43333 | 3.717034 | 0.1440972  | -22.61484 |
| 56.45    | 3.735293 | 0.1260862  | -22.6287  |
| 56.46667 | 3.693332 | 0.1305889  | -22.63563 |
| 56.48333 | 3.579705 | 0.09906514 | -22.64948 |
| 56.5     | 3.639428 | 0.1576055  | -22.6772  |
| 56.51667 | 3.478116 | 0.1440972  | -22.69798 |
| 56.53333 | 3.519659 | 0.1440972  | -22.71877 |
| 56.55    | 3.800788 | 0.1440972  | -22.75341 |
| 56.56667 | 3.938357 | 0.1215834  | -22.79498 |
| 56.58333 | 3.574172 | 0.1305889  | -22.85041 |
| 56.6     | 3.824699 | 0.1440972  | -22.87813 |
| 56.61666 | 3.597874 | 0.1486     | -22.88506 |
| 56.63334 | 4.039737 | 0.1440972  | -22.89198 |
| 56.65    | 3.843089 | 0.1350917  | -22.91277 |
| 56.66667 | 3.723451 | 0.1260862  | -22.94048 |
| 56.68333 | 3.992291 | 0.1125779  | -22.94741 |
| 56.7     | 3.663626 | 0.1305889  | -22.95434 |
| 56.71667 | 3.639357 | 0.1576055  | -22.97513 |
| 56.73333 | 3.753008 | 0.1486     | -22.98206 |
| 56.75    | 3.962471 | 0.1080706  | -22.98898 |
| 56.76667 | 3.591941 | 0.1350917  | -23.02363 |
| 56.78333 | 3.950127 | 0.1215834  | -23.04441 |
| 56.8     | 3.669815 | 0.08105411 | -23.05827 |
| 56.81667 | 3.729157 | 0.166611   | -23.0652  |
| 56.83333 | 4.165529 | 0.1125779  | -23.07906 |
| 56.85    | 4.064364 | 0.1215789  | -23.10677 |
| 56.86666 | 3.544286 | 0.1305889  | -23.13448 |
| 56.88334 | 3.794778 | 0.1350917  | -23.16913 |
| 56.9     | 3.920641 | 0.1621082  | -23.17605 |
| 56.91667 | 3.926688 | 0.139599   | -23.18298 |
| 56.93333 | 3.807169 | 0.1711182  | -23.19684 |
| 56.95    | 3.795064 | 0.166611   | -23.21763 |
| 56.96667 | 3.866672 | 0.1350917  | -23.23841 |
| 56.98333 | 4.00433  | 0.1486     | -23.2592  |
| 57       | 3.896916 | 0.1215834  | -23.27998 |
| 57.01667 | 3.860912 | 0.1215789  | -23.31463 |
| 57.03333 | 3.741232 | 0.1260862  | -23.34234 |
| 57.05    | 3.830961 | 0.1080706  | -23.34927 |
| 57.06667 | 3.759246 | 0.08555687 | -23.37698 |

|          |          |            |           |
|----------|----------|------------|-----------|
| 57.08333 | 3.484079 | 0.166611   | -23.41163 |
| 57.1     | 3.687155 | 0.1260862  | -23.43241 |
| 57.11666 | 4.015975 | 0.1170807  | -23.4532  |
| 57.13334 | 3.484628 | 0.1125734  | -23.47398 |
| 57.15    | 3.83034  | 0.1305844  | -23.5017  |
| 57.16667 | 3.645737 | 0.09005962 | -23.53634 |
| 57.18333 | 3.496011 | 0.1756165  | -23.58484 |
| 57.2     | 3.854525 | 0.1621127  | -23.60563 |
| 57.21667 | 3.795011 | 0.1125779  | -23.61948 |
| 57.23333 | 3.711227 | 0.1170762  | -23.6472  |
| 57.25    | 3.837031 | 0.1305889  | -23.68184 |
| 57.26667 | 3.842791 | 0.1305889  | -23.71648 |
| 57.28333 | 4.088036 | 0.1170807  | -23.7442  |
| 57.3     | 3.592048 | 0.1395945  | -23.75805 |
| 57.31667 | 4.069867 | 0.1350917  | -23.77884 |
| 57.33333 | 3.884888 | 0.1486     | -23.79963 |
| 57.35    | 3.920743 | 0.1170807  | -23.81348 |
| 57.36666 | 3.723415 | 0.1260817  | -23.81348 |
| 57.38334 | 3.824777 | 0.1260862  | -23.82734 |
| 57.4     | 3.460353 | 0.09906514 | -23.86891 |
| 57.41667 | 3.603574 | 0.1215789  | -23.88277 |
| 57.43333 | 3.639273 | 0.1440972  | -23.88277 |
| 57.45    | 3.705174 | 0.1395945  | -23.90355 |
| 57.46667 | 3.645433 | 0.1170762  | -23.91741 |
| 57.48333 | 3.747165 | 0.1035679  | -23.94513 |
| 57.5     | 3.812881 | 0.1711137  | -23.97977 |
| 57.51667 | 3.992344 | 0.1260862  | -24.01441 |
| 57.53333 | 3.699552 | 0.1170807  | -24.02827 |
| 57.55    | 3.950348 | 0.1576055  | -24.01441 |
| 57.56667 | 3.84898  | 0.1440972  | -24.02134 |
| 57.58333 | 3.711489 | 0.2161548  | -24.02827 |
| 57.6     | 3.753193 | 0.1260862  | -24.02827 |
| 57.61666 | 3.472082 | 0.1125734  | -24.0352  |
| 57.63334 | 3.986065 | 0.1305889  | -24.06291 |
| 57.65    | 3.681652 | 0.1305889  | -24.07677 |
| 57.66667 | 3.645499 | 0.1350917  | -24.07677 |
| 57.68333 | 3.842647 | 0.1215834  | -24.10448 |
| 57.7     | 3.675539 | 0.1170807  | -24.12527 |
| 57.71667 | 3.88465  | 0.1170762  | -24.13913 |
| 57.73333 | 3.615756 | 0.1486     | -24.15298 |
| 57.75    | 3.466119 | 0.09456238 | -24.15991 |
| 57.76667 | 3.507781 | 0.166611   | -24.17377 |
| 57.78333 | 3.836625 | 0.1576055  | -24.1807  |
| 57.8     | 3.801117 | 0.2206576  | -24.17377 |
| 57.81667 | 3.812887 | 0.08105411 | -24.16684 |
| 57.83333 | 3.836923 | 0.09005962 | -24.17377 |
| 57.85    | 3.603848 | 0.1215834  | -24.17377 |

|          |          |            |           |
|----------|----------|------------|-----------|
| 57.86666 | 3.758888 | 0.1531027  | -24.17377 |
| 57.88334 | 3.729336 | 0.1350917  | -24.17377 |
| 57.9     | 3.806817 | 0.09456238 | -24.15298 |
| 57.91667 | 3.538066 | 0.1440927  | -24.1322  |
| 57.93333 | 3.759025 | 0.1801238  | -24.13913 |
| 57.95    | 3.920391 | 0.1125779  | -24.15991 |
| 57.96667 | 3.866857 | 0.1621082  | -24.17377 |
| 57.98333 | 3.831038 | 0.09906514 | -24.18763 |
| 58       | 3.657502 | 0.1350917  | -24.16684 |
| 58.01667 | 3.723308 | 0.211643   | -24.13913 |
| 58.03333 | 3.783043 | 0.1621127  | -24.11834 |
| 58.05    | 3.770974 | 0.2116521  | -24.0837  |
| 58.06667 | 3.7114   | 0.1170807  | -24.07677 |
| 58.08333 | 3.806924 | 0.1035679  | -24.09063 |
| 58.1     | 3.460144 | 0.1215789  | -24.06984 |
| 58.11666 | 3.836559 | 0.1621082  | -24.0352  |
| 58.13334 | 3.322999 | 0.1350917  | -24.00056 |
| 58.15    | 3.794509 | 0.1666155  | -23.96591 |
| 58.16667 | 3.609716 | 0.1170807  | -23.95898 |
| 58.18333 | 3.776854 | 0.1305844  | -23.95898 |
| 58.2     | 3.9145   | 0.1305889  | -23.95898 |
| 58.21667 | 3.837138 | 0.1305889  | -23.94513 |
| 58.23333 | 3.771052 | 0.1576055  | -23.92434 |
| 58.25    | 4.106056 | 0.1305889  | -23.90355 |
| 58.26667 | 3.693732 | 0.1576055  | -23.89663 |
| 58.28333 | 3.753056 | 0.2071448  | -23.90355 |
| 58.3     | 3.926318 | 0.15761    | -23.89663 |
| 58.31667 | 3.86099  | 0.1125734  | -23.87584 |
| 58.33333 | 3.944594 | 0.1305889  | -23.83427 |
| 58.35    | 3.836989 | 0.1350917  | -23.80655 |
| 58.36666 | 3.765274 | 0.15761    | -23.78577 |
| 58.38334 | 3.609656 | 0.1531027  | -23.77191 |
| 58.4     | 3.621558 | 0.1621127  | -23.75113 |
| 58.41667 | 3.980168 | 0.09906514 | -23.73727 |
| 58.43333 | 3.854955 | 0.1125734  | -23.70955 |
| 58.45    | 3.902729 | 0.1531027  | -23.67491 |
| 58.46667 | 3.609883 | 0.1395945  | -23.6472  |
| 58.48333 | 3.663351 | 0.1891293  | -23.62641 |
| 58.5     | 3.800812 | 0.1350917  | -23.60563 |
| 58.51667 | 3.66966  | 0.1080706  | -23.58484 |
| 58.53333 | 3.836768 | 0.1350917  | -23.56405 |
| 58.55    | 3.765137 | 0.1170807  | -23.56405 |
| 58.56667 | 3.663488 | 0.1305844  | -23.56405 |
| 58.58333 | 3.663375 | 0.1305889  | -23.54327 |
| 58.6     | 3.567696 | 0.1576055  | -23.50863 |
| 58.61666 | 3.591756 | 0.175621   | -23.49477 |
| 58.63334 | 4.099586 | 0.1305889  | -23.50863 |

|          |          |            |           |
|----------|----------|------------|-----------|
| 58.65    | 3.46061  | 0.1711182  | -23.50863 |
| 58.66667 | 3.818611 | 0.1486     | -23.48091 |
| 58.68333 | 3.884709 | 0.1125779  | -23.4532  |
| 58.7     | 3.771273 | 0.1215789  | -23.42548 |
| 58.71667 | 3.639476 | 0.1395945  | -23.4047  |
| 58.73333 | 4.087755 | 0.1215789  | -23.39084 |
| 58.75    | 3.914959 | 0.1531027  | -23.38391 |
| 58.76667 | 3.789227 | 0.1440972  | -23.37698 |
| 58.78333 | 3.687352 | 0.1260817  | -23.37005 |
| 58.8     | 3.795046 | 0.1350917  | -23.3562  |
| 58.81667 | 3.741256 | 0.1305889  | -23.34234 |
| 58.83333 | 3.531978 | 0.1170762  | -23.33541 |
| 58.85    | 3.507859 | 0.1576055  | -23.33541 |
| 58.86666 | 3.64529  | 0.175621   | -23.33541 |
| 58.88334 | 3.639458 | 0.1711182  | -23.32155 |
| 58.9     | 3.513983 | 0.1440972  | -23.30077 |
| 58.91667 | 3.63916  | 0.1260862  | -23.29384 |
| 58.93333 | 3.986238 | 0.1576055  | -23.29384 |
| 58.95    | 3.568089 | 0.1305889  | -23.29384 |
| 58.96667 | 3.711113 | 0.1981348  | -23.3077  |
| 58.98333 | 3.741142 | 0.1350917  | -23.31463 |
| 59       | 3.705216 | 0.1531072  | -23.29384 |
| 59.01667 | 3.795088 | 0.1350917  | -23.26613 |
| 59.03333 | 3.555967 | 0.1260862  | -23.23841 |
| 59.05    | 3.794629 | 0.1531027  | -23.24534 |
| 59.06667 | 3.663542 | 0.09906514 | -23.27305 |
| 59.08333 | 3.854824 | 0.1305844  | -23.29384 |
| 59.1     | 3.842797 | 0.1486     | -23.3077  |
| 59.11666 | 3.729366 | 0.15761    | -23.32848 |
| 59.13334 | 3.394547 | 0.1621082  | -23.36313 |
| 59.15    | 3.69298  | 0.1486045  | -23.39084 |
| 59.16667 | 3.484156 | 0.1260862  | -23.4047  |
| 59.18333 | 3.477842 | 0.1305889  | -23.41855 |
| 59.2     | 3.585512 | 0.1350872  | -23.43934 |
| 59.21667 | 3.830722 | 0.1035679  | -23.44627 |
| 59.23333 | 3.842886 | 0.1305889  | -23.44627 |
| 59.25    | 3.848861 | 0.1486     | -23.4532  |
| 59.26667 | 3.8609   | 0.1215834  | -23.43934 |
| 59.28333 | 3.699373 | 0.2071403  | -23.43241 |
| 59.3     | 3.759108 | 0.139599   | -23.44627 |
| 59.31667 | 3.651599 | 0.1531027  | -23.42548 |
| 59.33333 | 3.561888 | 0.08555687 | -23.39777 |
| 59.35    | 3.926115 | 0.1170762  | -23.41163 |
| 59.36666 | 3.663697 | 0.1846265  | -23.43934 |
| 59.38334 | 3.645409 | 0.1350917  | -23.44627 |
| 59.4     | 3.938428 | 0.1711182  | -23.46013 |
| 59.41667 | 3.657573 | 0.1891338  | -23.48091 |

|          |          |            |           |
|----------|----------|------------|-----------|
| 59.43333 | 3.950461 | 0.1035679  | -23.4532  |
| 59.45    | 3.938601 | 0.1621082  | -23.41163 |
| 59.46667 | 3.59203  | 0.1531072  | -23.4047  |
| 59.48333 | 3.579615 | 0.1621082  | -23.43934 |
| 59.5     | 3.794826 | 0.09456238 | -23.47398 |
| 59.51667 | 3.747177 | 0.1125734  | -23.5017  |
| 59.53333 | 3.621653 | 0.1305889  | -23.5017  |
| 59.55    | 3.669427 | 0.1440972  | -23.48784 |
| 59.56667 | 3.872485 | 0.1305889  | -23.47398 |
| 59.58333 | 3.66963  | 0.1305889  | -23.49477 |
| 59.6     | 3.657329 | 0.1305889  | -23.5017  |
| 59.61666 | 3.806918 | 0.1350917  | -23.49477 |
| 59.63334 | 3.84285  | 0.1170807  | -23.47398 |
| 59.65    | 3.896671 | 0.1531027  | -23.46013 |
| 59.66667 | 3.633961 | 0.1440972  | -23.43934 |
| 59.68333 | 3.734881 | 0.1170762  | -23.42548 |
| 59.7     | 3.687435 | 0.1215834  | -23.41855 |
| 59.71667 | 3.472183 | 0.1080706  | -23.41163 |
| 59.73333 | 3.53772  | 0.1395945  | -23.4047  |
| 59.75    | 3.657245 | 0.1531027  | -23.39777 |
| 59.76667 | 3.561816 | 0.1621082  | -23.37698 |
| 59.78333 | 3.81266  | 0.1440972  | -23.37005 |
| 59.8     | 3.508079 | 0.1576055  | -23.36313 |
| 59.81667 | 3.442142 | 0.1621127  | -23.33541 |
| 59.83333 | 3.734881 | 0.1035679  | -23.31463 |
| 59.85    | 3.65746  | 0.1350917  | -23.30077 |
| 59.86666 | 3.669362 | 0.1440972  | -23.27998 |
| 59.88334 | 3.615553 | 0.1440972  | -23.24534 |
| 59.9     | 3.723212 | 0.1531072  | -23.21763 |
| 59.91667 | 3.681341 | 0.1576055  | -23.21763 |
| 59.93333 | 3.579884 | 0.1486045  | -23.2107  |
| 59.95    | 3.6273   | 0.1440972  | -23.18991 |
| 59.96667 | 3.454134 | 0.1215834  | -23.15527 |
| 59.98333 | 3.800526 | 0.1080706  | -23.10677 |
| 60       | 3.633722 | 0.1125734  | -23.07213 |
| 60.01667 | 3.466149 | 0.175621   | -23.05827 |
| 60.03333 | 3.770819 | 0.1711182  | -23.05134 |
| 60.05    | 3.764988 | 0.08555687 | -23.04441 |
| 60.06667 | 3.364614 | 0.1080706  | -23.03748 |
| 60.08333 | 3.370308 | 0.1260817  | -23.00977 |
| 60.1     | 3.615207 | 0.1486     | -22.97513 |
| 60.11666 | 3.633621 | 0.1531072  | -22.93356 |
| 60.13334 | 3.687065 | 0.139599   | -22.88506 |
| 60.15    | 3.43036  | 0.09456238 | -22.82963 |
| 60.16667 | 3.483757 | 0.1891248  | -22.78113 |
| 60.18333 | 3.729127 | 0.1621127  | -22.74648 |
| 60.2     | 3.723212 | 0.1035724  | -22.69798 |

|          |          |            |           |
|----------|----------|------------|-----------|
| 60.21667 | 3.681311 | 0.1125734  | -22.64256 |
| 60.23333 | 3.358603 | 0.1215834  | -22.58713 |
| 60.25    | 3.51366  | 0.1080706  | -22.51091 |
| 60.26667 | 3.603389 | 0.08555687 | -22.45548 |
| 60.28333 | 3.627568 | 0.1260817  | -22.42084 |
| 60.3     | 3.507948 | 0.1576055  | -22.39313 |
| 60.31667 | 3.639231 | 0.1486     | -22.35155 |
| 60.33333 | 3.49607  | 0.1215834  | -22.29613 |
| 60.35    | 3.663244 | 0.1215789  | -22.23377 |
| 60.36666 | 3.681281 | 0.1621082  | -22.17141 |
| 60.38334 | 3.472111 | 0.1846265  | -22.13677 |
| 60.4     | 3.525669 | 0.1305889  | -22.10906 |
| 60.41667 | 3.364542 | 0.1576055  | -22.0467  |
| 60.43333 | 3.621074 | 0.1305889  | -21.96356 |
| 60.45    | 3.591791 | 0.1531027  | -21.9012  |
| 60.46667 | 3.334489 | 0.1440972  | -21.8527  |
| 60.48333 | 3.483763 | 0.1395945  | -21.79727 |
| 60.5     | 3.62145  | 0.1305889  | -21.74184 |
| 60.51667 | 3.681299 | 0.1486     | -21.69334 |
| 60.53333 | 3.466095 | 0.1260862  | -21.63791 |
| 60.55    | 3.340464 | 0.1080706  | -21.56863 |
| 60.56667 | 3.519689 | 0.1215789  | -21.50627 |
| 60.58333 | 3.633292 | 0.1801238  | -21.44391 |
| 60.6     | 3.490042 | 0.1440972  | -21.38156 |
| 60.61666 | 3.495831 | 0.1350917  | -21.33998 |
| 60.63334 | 3.621456 | 0.1215834  | -21.30534 |
| 60.65    | 3.890547 | 0.1621082  | -21.25684 |
| 60.66667 | 3.460311 | 0.1125779  | -21.20141 |
| 60.68333 | 3.460102 | 0.1170762  | -21.14598 |
| 60.7     | 3.50174  | 0.1531027  | -21.08363 |
| 60.71667 | 3.525825 | 0.1305889  | -21.0282  |
| 60.73333 | 3.346415 | 0.09906514 | -20.96584 |
| 60.75    | 3.412071 | 0.1080706  | -20.89656 |
| 60.76667 | 3.537631 | 0.1260862  | -20.82034 |
| 60.78333 | 3.382454 | 0.1170762  | -20.75106 |
| 60.8     | 3.274521 | 0.1080706  | -20.70256 |
| 60.81667 | 3.376044 | 0.1035679  | -20.65406 |
| 60.83333 | 3.459911 | 0.1170807  | -20.60556 |
| 60.85    | 3.507829 | 0.1576055  | -20.55013 |
| 60.86666 | 3.334525 | 0.1395945  | -20.50163 |
| 60.88334 | 3.519545 | 0.1215834  | -20.46006 |
| 60.9     | 3.42432  | 0.1035679  | -20.40463 |
| 60.91667 | 3.519629 | 0.1486     | -20.34227 |
| 60.93333 | 3.495891 | 0.09456238 | -20.28684 |
| 60.95    | 3.471891 | 0.1170762  | -20.2522  |
| 60.96667 | 3.334597 | 0.1486     | -20.21063 |
| 60.98333 | 3.25058  | 0.1395945  | -20.16906 |

|          |          |            |           |
|----------|----------|------------|-----------|
| 61       | 3.352169 | 0.1350917  | -20.12749 |
| 61.01667 | 3.202967 | 0.1395945  | -20.08591 |
| 61.03333 | 3.411863 | 0.09005962 | -20.0582  |
| 61.05    | 3.149183 | 0.09456238 | -20.03049 |
| 61.06667 | 3.23841  | 0.1350872  | -19.99584 |
| 61.08333 | 3.525634 | 0.1215834  | -19.94734 |
| 61.1     | 3.406163 | 0.1440972  | -19.88498 |
| 61.11666 | 3.286614 | 0.1440972  | -19.82263 |
| 61.13334 | 3.22073  | 0.1305889  | -19.78799 |
| 61.15    | 3.579221 | 0.1486     | -19.7672  |
| 61.16667 | 3.310656 | 0.1350917  | -19.75334 |
| 61.18333 | 3.513577 | 0.09005962 | -19.72563 |
| 61.2     | 3.412304 | 0.1350917  | -19.70484 |
| 61.21667 | 3.388137 | 0.1305889  | -19.67713 |
| 61.23333 | 3.6391   | 0.1080706  | -19.64249 |
| 61.25    | 3.388495 | 0.1170762  | -19.6217  |
| 61.26667 | 3.334358 | 0.1215834  | -19.60091 |
| 61.28333 | 3.513708 | 0.1215789  | -19.58013 |
| 61.3     | 3.531632 | 0.1576055  | -19.55934 |
| 61.31667 | 3.298695 | 0.1350917  | -19.54549 |
| 61.33333 | 3.286405 | 0.1305889  | -19.51777 |
| 61.35    | 3.459828 | 0.1440972  | -19.49699 |
| 61.36666 | 3.334537 | 0.1486     | -19.49006 |
| 61.38334 | 3.178829 | 0.08555687 | -19.49006 |
| 61.4     | 3.340249 | 0.1350872  | -19.49006 |
| 61.41667 | 3.202782 | 0.1486     | -19.49699 |
| 61.43333 | 3.238601 | 0.1125779  | -19.49006 |
| 61.45    | 3.465719 | 0.1170762  | -19.49699 |
| 61.46667 | 3.238798 | 0.1080706  | -19.51084 |
| 61.48333 | 3.131151 | 0.1170807  | -19.51084 |
| 61.5     | 3.077127 | 0.1305844  | -19.51777 |
| 61.51667 | 3.495318 | 0.1260862  | -19.53163 |
| 61.53333 | 3.298748 | 0.1440972  | -19.53163 |
| 61.55    | 3.053431 | 0.09005962 | -19.53163 |
| 61.56667 | 3.411719 | 0.1531027  | -19.53163 |
| 61.58333 | 3.250723 | 0.1035679  | -19.54549 |
| 61.6     | 3.131103 | 0.1260862  | -19.56627 |
| 61.61666 | 2.987476 | 0.1080706  | -19.59399 |
| 61.63334 | 3.238446 | 0.1756165  | -19.6217  |
| 61.65    | 3.561255 | 0.09906514 | -19.64941 |
| 61.66667 | 3.358514 | 0.1756165  | -19.6702  |
| 61.68333 | 3.089322 | 0.1350917  | -19.68406 |
| 61.7     | 3.184673 | 0.1711137  | -19.70484 |
| 61.71667 | 3.268439 | 0.1440972  | -19.74641 |
| 61.73333 | 3.119195 | 0.1080751  | -19.77413 |
| 61.75    | 3.148938 | 0.1350917  | -19.78799 |
| 61.76667 | 3.184619 | 0.1801238  | -19.80877 |

|          |          |           |           |
|----------|----------|-----------|-----------|
| 61.78333 | 3.358126 | 0.184631  | -19.8642  |
| 61.8     | 3.178895 | 0.1486    | -19.93349 |
| 61.81667 | 3.143017 | 0.1125779 | -19.98891 |
| 61.83333 | 3.411898 | 0.166611  | -20.05127 |
| 61.85    | 3.143094 | 0.1711182 | -20.09977 |
| 61.86666 | 3.567278 | 0.202642  | -20.13441 |
| 61.88334 | 3.101456 | 0.1531072 | -20.16213 |
| 61.9     | 3.447628 | 0.1666155 | -20.21063 |
| 61.91667 | 3.220921 | 0.2161503 | -20.25913 |
| 61.93333 | 3.041309 | 0.2161548 | -20.29377 |
| 61.95    | 3.579168 | 0.1486045 | -20.30763 |
| 61.96667 | 3.364429 | 0.2071448 | -20.32841 |
| 61.98333 | 3.340303 | 0.2116521 | -20.36999 |
| 62       | 2.921951 | 0.2431713 | -20.42541 |
| 62.01667 | 3.339927 | 0.2341703 | -20.47391 |
| 62.03333 | 3.382257 | 0.1981393 | -20.52241 |
| 62.05    | 3.167065 | 0.1936365 | -20.57091 |
| 62.06667 | 3.250544 | 0.2341658 | -20.60556 |
| 62.08333 | 3.029485 | 0.315238  | -20.61249 |
| 62.1     | 3.328019 | 0.3017297 | -20.61941 |
| 62.11666 | 3.119148 | 0.2792069 | -20.64713 |
| 62.13334 | 3.142963 | 0.3737828 | -20.67484 |
| 62.15    | 3.298229 | 0.2927197 | -20.69563 |
| 62.16667 | 3.286572 | 0.342259  | -20.73027 |
| 62.18333 | 3.208769 | 0.3692845 | -20.77184 |
| 62.2     | 2.975628 | 0.369289  | -20.79263 |
| 62.21667 | 3.202472 | 0.4188284 | -20.76491 |
| 62.23333 | 3.280484 | 0.3783036 | -20.7372  |
| 62.25    | 3.035471 | 0.3963011 | -20.75799 |
| 62.26667 | 3.339921 | 0.360288  | -20.77877 |
| 62.28333 | 3.011662 | 0.4863832 | -20.76491 |
| 62.3     | 3.32208  | 0.4413646 | -20.75106 |
| 62.31667 | 3.561434 | 0.4413556 | -20.75799 |
| 62.33333 | 3.382395 | 0.5764878 | -20.76491 |
| 62.35    | 3.15505  | 0.490922  | -20.74413 |
| 62.36666 | 3.190803 | 0.6530707 | -20.72334 |
| 62.38334 | 3.405852 | 0.6530752 | -20.68177 |
| 62.4     | 3.13124  | 0.7522034 | -20.62634 |
| 62.41667 | 3.340201 | 0.7161724 | -20.55706 |
| 62.43333 | 3.417909 | 0.8287863 | -20.50163 |
| 62.45    | 3.400176 | 0.806313  | -20.46006 |
| 62.46667 | 3.316494 | 0.936938  | -20.3977  |
| 62.48333 | 3.304323 | 1.027101  | -20.30763 |
| 62.5     | 3.262625 | 0.9685113 | -20.22449 |
| 62.51667 | 3.160923 | 1.162224  | -20.1552  |
| 62.53333 | 3.537422 | 1.099271  | -20.09284 |
| 62.55    | 3.334501 | 1.310977  | -20.03049 |



|          |          |          |           |
|----------|----------|----------|-----------|
| 62.56667 | 3.764671 | 1.320086 | -19.97506 |
| 62.58333 | 3.454241 | 1.320096 | -19.89884 |
| 62.6     | 3.298623 | 1.446249 | -19.79491 |
| 62.61666 | 3.453865 | 1.518383 | -19.69099 |
| 62.63334 | 3.430061 | 1.721345 | -19.60784 |
| 62.65    | 3.32855  | 1.933236 | -19.51777 |
| 62.66667 | 3.860184 | 1.757529 | -19.41384 |
| 62.68333 | 3.645636 | 2.0415   | -19.30992 |
| 62.7     | 3.639464 | 1.982996 | -19.19906 |
| 62.71667 | 3.370714 | 2.172323 | -19.08127 |
| 62.73333 | 3.704715 | 2.352749 | -18.97042 |
| 62.75    | 3.418386 | 2.528802 | -18.85263 |
| 62.76667 | 3.818521 | 2.605641 | -18.73484 |
| 62.78333 | 3.735424 | 2.677812 | -18.61013 |
| 62.8     | 3.968129 | 2.871673 | -18.49234 |
| 62.81667 | 3.556224 | 3.0074   | -18.3607  |
| 62.83333 | 3.687083 | 3.007373 | -18.22906 |
| 62.85    | 4.022033 | 3.611904 | -18.12513 |
| 62.86666 | 4.052337 | 3.535965 | -18.04199 |
| 62.88334 | 4.010484 | 3.819922 | -17.93113 |
| 62.9     | 3.974766 | 3.919474 | -17.79256 |
| 62.91667 | 4.099956 | 4.127726 | -17.66092 |
| 62.93333 | 4.219893 | 4.6017   | -17.55699 |
| 62.95    | 4.148201 | 4.466788 | -17.44613 |
| 62.96667 | 4.201968 | 5.252564 | -17.32834 |
| 62.98333 | 4.423243 | 5.402623 | -17.21056 |
| 63       | 4.256027 | 5.547013 | -17.12049 |
| 63.01667 | 4.63255  | 5.710535 | -17.04427 |
| 63.03333 | 4.513473 | 6.054167 | -16.97499 |
| 63.05    | 4.399744 | 6.755134 | -16.88492 |
| 63.06667 | 4.632831 | 6.914811 | -16.82256 |
| 63.08333 | 4.74659  | 7.028046 | -16.7602  |
| 63.1     | 4.740865 | 7.589157 | -16.68399 |
| 63.11666 | 4.806516 | 8.128924 | -16.62163 |
| 63.13334 | 4.770805 | 7.863023 | -16.55235 |
| 63.15    | 4.938181 | 8.586008 | -16.48999 |
| 63.16667 | 5.141997 | 9.127154 | -16.44842 |
| 63.18333 | 5.309368 | 10.05277 | -16.41377 |
| 63.2     | 4.938903 | 10.06372 | -16.39299 |
| 63.21667 | 5.064075 | 10.28514 | -16.3722  |
| 63.23333 | 5.590551 | 10.84838 | -16.3722  |
| 63.25    | 5.292213 | 11.51692 | -16.3722  |
| 63.26667 | 5.692468 | 12.33934 | -16.36527 |
| 63.28333 | 5.43596  | 12.40991 | -16.3722  |
| 63.3     | 5.68102  | 12.47468 | -16.39992 |
| 63.31667 | 5.729128 | 13.44106 | -16.43456 |
| 63.33333 | 6.004295 | 13.86736 | -16.47613 |

|          |          |          |           |
|----------|----------|----------|-----------|
| 63.35    | 6.082576 | 15.07042 | -16.5177  |
| 63.36666 | 5.765711 | 15.3096  | -16.5662  |
| 63.38334 | 6.249737 | 15.81024 | -16.62163 |
| 63.4     | 6.423704 | 16.17449 | -16.69092 |
| 63.41667 | 6.50818  | 17.97669 | -16.75327 |
| 63.43333 | 6.921398 | 17.88036 | -16.80177 |
| 63.45    | 6.927755 | 18.87455 | -16.86413 |
| 63.46667 | 6.694788 | 18.79497 | -16.94727 |
| 63.48333 | 6.36521  | 19.16855 | -17.04427 |
| 63.5     | 6.920802 | 21.22776 | -17.16206 |
| 63.51667 | 7.143515 | 22.10746 | -17.26599 |
| 63.53333 | 7.012046 | 23.00791 | -17.36299 |
| 63.55    | 7.275472 | 23.09941 | -17.47384 |
| 63.56667 | 7.401366 | 24.45286 | -17.57084 |
| 63.58333 | 7.605194 | 24.55117 | -17.67477 |
| 63.6     | 7.133576 | 25.94543 | -17.80642 |
| 63.61666 | 7.891809 | 26.91861 | -17.93806 |
| 63.63334 | 7.534434 | 28.05078 | -18.0697  |
| 63.65    | 7.899043 | 28.55681 | -18.20134 |
| 63.66667 | 8.133174 | 29.48746 | -18.3122  |
| 63.68333 | 8.181855 | 30.47311 | -18.44384 |
| 63.7     | 8.008284 | 31.02966 | -18.59627 |
| 63.71667 | 8.630284 | 31.94901 | -18.74177 |
| 63.73333 | 8.200747 | 33.13088 | -18.86649 |
| 63.75    | 8.559631 | 34.53365 | -18.99813 |
| 63.76667 | 8.596185 | 35.69979 | -19.12977 |
| 63.78333 | 9.002742 | 36.03189 | -19.26834 |
| 63.8     | 8.956418 | 37.52975 | -19.40691 |
| 63.81667 | 8.782512 | 37.8117  | -19.55934 |
| 63.83333 | 9.608353 | 39.62241 | -19.70484 |
| 63.85    | 9.089916 | 41.46444 | -19.82956 |
| 63.86666 | 9.616214 | 42.11644 | -19.95427 |
| 63.88334 | 9.251628 | 43.62446 | -20.08591 |
| 63.9     | 9.615419 | 44.63443 | -20.21063 |
| 63.91667 | 10.12025 | 45.1576  | -20.33534 |
| 63.93333 | 9.911853 | 46.01907 | -20.45313 |
| 63.95    | 10.19912 | 47.48949 | -20.55706 |
| 63.96667 | 10.24172 | 48.25829 | -20.66791 |
| 63.98333 | 10.26041 | 50.40318 | -20.80648 |
| 64       | 10.28984 | 51.06522 | -20.92427 |
| 64.01667 | 10.54739 | 52.52015 | -21.04206 |
| 64.03333 | 10.87794 | 54.1039  | -21.15291 |
| 64.05    | 10.62692 | 55.21068 | -21.26377 |
| 64.06667 | 10.84274 | 55.44897 | -21.36077 |
| 64.08334 | 10.54894 | 57.95173 | -21.45084 |
| 64.1     | 11.09383 | 57.79234 | -21.52706 |
| 64.11667 | 11.31197 | 59.15672 | -21.61713 |

|          |          |          |           |
|----------|----------|----------|-----------|
| 64.13333 | 11.32366 | 60.9109  | -21.71413 |
| 64.15    | 11.41378 | 61.68515 | -21.79034 |
| 64.16666 | 11.75601 | 62.95029 | -21.85963 |
| 64.18333 | 11.51161 | 63.70265 | -21.94277 |
| 64.2     | 11.88229 | 65.77711 | -22.01206 |
| 64.21667 | 11.93744 | 67.31994 | -22.08827 |
| 64.23333 | 11.65012 | 68.00868 | -22.16448 |
| 64.25    | 11.93608 | 69.67682 | -22.23377 |
| 64.26667 | 11.67421 | 70.85492 | -22.30998 |
| 64.28333 | 12.50005 | 71.18552 | -22.37234 |
| 64.3     | 12.04239 | 72.72595 | -22.42084 |
| 64.31667 | 12.38742 | 73.06631 | -22.49706 |
| 64.33334 | 12.47235 | 74.49342 | -22.5802  |
| 64.35    | 12.83342 | 74.6076  | -22.6287  |
| 64.36667 | 12.08461 | 76.83003 | -22.66334 |
| 64.38333 | 12.81364 | 78.45323 | -22.69798 |
| 64.4     | 12.42599 | 79.21816 | -22.74648 |
| 64.41666 | 12.42572 | 80.43467 | -22.80191 |
| 64.43333 | 13.30701 | 81.73939 | -22.84348 |
| 64.45    | 12.96198 | 81.7873  | -22.85734 |
| 64.46667 | 13.0685  | 83.4544  | -22.86427 |
| 64.48333 | 13.04644 | 84.4985  | -22.89198 |
| 64.5     | 12.84667 | 84.88465 | -22.94048 |
| 64.51667 | 12.76889 | 84.8448  | -22.98898 |
| 64.53333 | 12.41985 | 86.61088 | -23.00977 |
| 64.55    | 13.09124 | 88.92867 | -23.02363 |
| 64.56667 | 13.19524 | 88.90449 | -23.03748 |
| 64.58334 | 13.07623 | 88.58421 | -23.05827 |
| 64.6     | 13.33254 | 91.34904 | -23.09291 |
| 64.61667 | 13.42489 | 90.79826 | -23.13448 |
| 64.63333 | 12.68665 | 92.68392 | -23.18298 |
| 64.65    | 12.94848 | 92.5641  | -23.20377 |
| 64.66666 | 13.09293 | 92.49778 | -23.21763 |
| 64.68333 | 13.14765 | 94.71489 | -23.23148 |
| 64.7     | 12.89491 | 93.96712 | -23.23841 |
| 64.71667 | 13.26103 | 95.64475 | -23.25227 |
| 64.73333 | 13.05191 | 95.39674 | -23.27305 |
| 64.75    | 12.64948 | 97.33396 | -23.27305 |
| 64.76667 | 12.85171 | 96.38419 | -23.25227 |
| 64.78333 | 13.01398 | 96.89333 | -23.26613 |
| 64.8     | 12.70925 | 97.74957 | -23.30077 |
| 64.81667 | 12.77443 | 98.60176 | -23.32155 |
| 64.83334 | 12.91788 | 97.81756 | -23.32155 |
| 64.85    | 12.89561 | 99.15447 | -23.33541 |
| 64.86667 | 12.58174 | 99.46985 | -23.36313 |
| 64.88333 | 12.4921  | 99.0293  | -23.37005 |
| 64.9     | 12.76769 | 99.65725 | -23.3562  |

|          |          |          |           |
|----------|----------|----------|-----------|
| 64.91666 | 11.95821 | 99.4965  | -23.34927 |
| 64.93333 | 12.28011 | 99.73699 | -23.37005 |
| 64.95    | 12.50189 | 99.73001 | -23.38391 |
| 64.96667 | 12.46253 | 99.57021 | -23.36313 |
| 64.98333 | 12.05297 | 99.41901 | -23.3562  |
| 65       | 11.93825 | 100      | -23.37698 |
| 65.01667 | 11.90808 | 98.87917 | -23.39777 |
| 65.03333 | 11.78658 | 99.17874 | -23.39777 |
| 65.05    | 12.26181 | 99.0958  | -23.37698 |
| 65.06667 | 11.89592 | 99.7465  | -23.36313 |
| 65.08334 | 11.84817 | 98.37711 | -23.38391 |
| 65.1     | 11.5596  | 98.42484 | -23.4047  |
| 65.11667 | 12.07459 | 99.69949 | -23.42548 |
| 65.13333 | 11.64396 | 97.83616 | -23.42548 |
| 65.15    | 11.48131 | 98.04558 | -23.42548 |
| 65.16666 | 11.37848 | 97.89172 | -23.43241 |
| 65.18333 | 10.9411  | 97.24522 | -23.42548 |
| 65.2     | 10.92677 | 97.08527 | -23.43241 |
| 65.21667 | 11.56315 | 97.91193 | -23.4532  |
| 65.23333 | 11.32394 | 96.02141 | -23.4532  |
| 65.25    | 10.94755 | 94.737   | -23.4532  |
| 65.26667 | 11.10094 | 94.81683 | -23.46013 |
| 65.28333 | 10.69363 | 93.81465 | -23.46013 |
| 65.3     | 10.74743 | 92.86489 | -23.44627 |
| 65.31667 | 10.3987  | 93.07327 | -23.43241 |
| 65.33334 | 10.65039 | 92.1087  | -23.43241 |
| 65.35    | 10.32688 | 90.25928 | -23.46013 |
| 65.36667 | 9.966252 | 91.28284 | -23.48784 |
| 65.38333 | 9.761971 | 91.01263 | -23.49477 |
| 65.4     | 9.772733 | 89.51349 | -23.48784 |
| 65.41666 | 9.827275 | 87.9613  | -23.46705 |
| 65.43333 | 9.600038 | 86.62132 | -23.4532  |
| 65.45    | 9.311214 | 87.04031 | -23.43934 |
| 65.46667 | 9.71816  | 85.56767 | -23.44627 |
| 65.48333 | 9.425266 | 84.78046 | -23.44627 |
| 65.5     | 9.484727 | 84.32384 | -23.42548 |
| 65.51667 | 9.101728 | 84.09798 | -23.41855 |
| 65.53333 | 8.794945 | 82.84333 | -23.41855 |
| 65.55    | 8.914273 | 81.34467 | -23.41163 |
| 65.56667 | 8.74621  | 80.01744 | -23.41163 |
| 65.58334 | 8.734129 | 79.94122 | -23.39777 |
| 65.6     | 8.488483 | 78.41235 | -23.38391 |
| 65.61667 | 8.350367 | 76.92563 | -23.39084 |
| 65.63333 | 8.313813 | 76.88834 | -23.38391 |
| 65.65    | 7.888818 | 76.14521 | -23.38391 |
| 65.66666 | 8.378814 | 73.59093 | -23.38391 |
| 65.68333 | 8.026703 | 72.97491 | -23.37005 |

|          |          |          |           |
|----------|----------|----------|-----------|
| 65.7     | 7.864305 | 72.5032  | -23.34927 |
| 65.71667 | 7.534195 | 69.78606 | -23.34234 |
| 65.73333 | 7.827173 | 70.05798 | -23.32155 |
| 65.75    | 7.091658 | 69.17999 | -23.30077 |
| 65.76667 | 7.245366 | 68.36683 | -23.27305 |
| 65.78333 | 7.257972 | 66.93158 | -23.23841 |
| 65.8     | 7.221825 | 66.10316 | -23.20377 |
| 65.81667 | 7.437507 | 65.74105 | -23.17605 |
| 65.83334 | 7.228199 | 63.6828  | -23.14141 |
| 65.85    | 6.862898 | 62.02407 | -23.1137  |
| 65.86667 | 6.850435 | 61.20461 | -23.08598 |
| 65.88333 | 7.023548 | 60.93972 | -23.05827 |
| 65.9     | 6.712586 | 58.76921 | -23.03748 |
| 65.91666 | 6.772155 | 58.24981 | -23.00284 |
| 65.93333 | 6.27523  | 57.10139 | -22.9682  |
| 65.95    | 6.077383 | 55.89339 | -22.94048 |
| 65.96667 | 6.477363 | 53.8377  | -22.91277 |
| 65.98333 | 6.239041 | 53.56033 | -22.85041 |
| 66       | 5.891503 | 53.29588 | -22.78806 |
| 66.01667 | 5.872934 | 51.54809 | -22.74648 |
| 66.03333 | 5.777153 | 51.069   | -22.69798 |
| 66.05    | 5.711664 | 49.98406 | -22.65641 |
| 66.06667 | 5.579252 | 48.69708 | -22.62177 |
| 66.08334 | 5.615477 | 47.16587 | -22.5802  |
| 66.1     | 5.537333 | 46.65535 | -22.51784 |
| 66.11667 | 5.166803 | 46.26487 | -22.44163 |
| 66.13333 | 5.297645 | 44.9215  | -22.37927 |
| 66.15    | 5.010666 | 43.47978 | -22.33077 |
| 66.16666 | 5.070145 | 42.48845 | -22.29613 |
| 66.18333 | 5.034362 | 42.51778 | -22.23377 |
| 66.2     | 5.165789 | 40.88684 | -22.1437  |
| 66.21667 | 4.801263 | 39.90382 | -22.06748 |
| 66.23333 | 4.962224 | 39.63079 | -22.01206 |
| 66.25    | 4.741116 | 38.08402 | -21.93584 |
| 66.26667 | 4.238443 | 37.57843 | -21.83884 |
| 66.28333 | 4.536918 | 36.12767 | -21.76263 |
| 66.3     | 4.615032 | 35.82803 | -21.71413 |
| 66.31667 | 4.405814 | 34.87757 | -21.65177 |
| 66.33334 | 4.626635 | 33.79539 | -21.57556 |
| 66.35    | 4.274405 | 33.28423 | -21.50627 |
| 66.36667 | 4.369452 | 32.0501  | -21.43006 |
| 66.38333 | 4.381479 | 31.1     | -21.37463 |
| 66.4     | 4.285991 | 31.53391 | -21.3192  |
| 66.41666 | 4.160127 | 30.59074 | -21.24991 |
| 66.43333 | 4.130307 | 28.69599 | -21.16677 |
| 66.45    | 4.112293 | 28.75869 | -21.0767  |
| 66.46667 | 3.932824 | 27.25428 | -21.00741 |

|          |          |          |           |
|----------|----------|----------|-----------|
| 66.48333 | 3.968499 | 27.22102 | -20.95198 |
| 66.5     | 3.938894 | 26.63312 | -20.8827  |
| 66.51667 | 4.105948 | 25.92017 | -20.81341 |
| 66.53333 | 3.867119 | 24.8695  | -20.77877 |
| 66.55    | 3.896743 | 24.33211 | -20.75799 |
| 66.56667 | 3.932555 | 23.63433 | -20.70949 |
| 66.58334 | 3.753432 | 22.86406 | -20.6402  |
| 66.6     | 3.651521 | 22.27273 | -20.5917  |
| 66.61667 | 3.567851 | 21.69526 | -20.55706 |
| 66.63333 | 3.740975 | 21.35996 | -20.50856 |
| 66.65    | 3.597802 | 20.31098 | -20.43927 |
| 66.66666 | 3.603401 | 19.8426  | -20.37691 |
| 66.68333 | 3.406318 | 19.39136 | -20.3492  |
| 66.7     | 3.501842 | 18.63589 | -20.32149 |
| 66.71667 | 3.460019 | 18.18852 | -20.26606 |
| 66.73333 | 3.441987 | 17.45638 | -20.21063 |
| 66.75    | 3.304669 | 16.98749 | -20.18291 |
| 66.76667 | 3.21469  | 16.68    | -20.16213 |
| 66.78333 | 3.322271 | 16.29474 | -20.14134 |
| 66.8     | 3.489773 | 15.84184 | -20.11363 |
| 66.81667 | 3.537589 | 15.20981 | -20.08591 |
| 66.83334 | 3.233002 | 14.97276 | -20.06513 |
| 66.85    | 3.310238 | 14.3748  | -20.04434 |
| 66.86667 | 3.406079 | 14.25522 | -20.04434 |
| 66.88333 | 3.388214 | 13.25683 | -20.0582  |
| 66.9     | 3.424069 | 12.68122 | -20.07899 |
| 66.91666 | 3.005651 | 12.57986 | -20.09284 |
| 66.93333 | 3.059132 | 11.81244 | -20.1067  |
| 66.95    | 3.208769 | 11.91931 | -20.1067  |
| 66.96667 | 3.16075  | 11.62427 | -20.09977 |
| 66.98333 | 3.32821  | 10.86475 | -20.11363 |
| 67       | 3.26851  | 10.7157  | -20.14134 |
| 67.01667 | 2.838346 | 10.58047 | -20.18291 |
| 67.03333 | 2.891659 | 10.07446 | -20.21063 |
| 67.05    | 3.184458 | 9.565898 | -20.23141 |
| 67.06667 | 2.993564 | 9.256091 | -20.2522  |
| 67.08334 | 2.927675 | 9.046654 | -20.27991 |
| 67.1     | 3.035233 | 8.688825 | -20.30763 |
| 67.11667 | 2.802158 | 8.687519 | -20.35613 |
| 67.13333 | 2.945408 | 8.322116 | -20.41156 |
| 67.15    | 3.035233 | 7.95329  | -20.46006 |
| 67.16666 | 2.62895  | 7.952926 | -20.48777 |
| 67.18333 | 3.022913 | 7.505572 | -20.52934 |
| 67.2     | 3.035286 | 7.15093  | -20.59863 |
| 67.21667 | 2.849973 | 7.562996 | -20.64713 |
| 67.23333 | 2.969379 | 7.042685 | -20.67484 |
| 67.25    | 2.939559 | 6.820401 | -20.70949 |

|          |          |          |           |
|----------|----------|----------|-----------|
| 67.26667 | 2.927609 | 6.498792 | -20.75106 |
| 67.28333 | 2.897766 | 6.308469 | -20.80648 |
| 67.3     | 2.664637 | 6.005371 | -20.87577 |
| 67.31667 | 2.957227 | 6.094822 | -20.94506 |
| 67.33334 | 2.64078  | 5.485397 | -21.02127 |
| 67.35    | 2.736256 | 5.525066 | -21.09748 |
| 67.36667 | 2.634656 | 5.502251 | -21.14598 |
| 67.38333 | 2.927341 | 5.240253 | -21.18063 |
| 67.4     | 2.903603 | 5.127244 | -21.24298 |
| 67.41666 | 2.897753 | 4.756396 | -21.29841 |
| 67.43333 | 2.772135 | 4.89627  | -21.33998 |
| 67.45    | 2.640654 | 4.539107 | -21.40234 |
| 67.46667 | 2.712268 | 4.548238 | -21.4647  |
| 67.48333 | 2.556978 | 4.358141 | -21.52013 |
| 67.5     | 2.742016 | 4.033087 | -21.56863 |
| 67.51667 | 2.760197 | 4.005611 | -21.6102  |
| 67.53333 | 2.568975 | 3.956171 | -21.6587  |
| 67.55    | 2.610643 | 4.000906 | -21.72106 |
| 67.56667 | 2.622575 | 3.617375 | -21.78341 |
| 67.58334 | 2.622587 | 3.459314 | -21.8527  |
| 67.6     | 2.837726 | 3.41381  | -21.9012  |
| 67.61667 | 2.437578 | 3.206165 | -21.9497  |
| 67.63333 | 2.32977  | 3.178815 | -22.00513 |
| 67.65    | 2.759779 | 3.319094 | -22.05363 |
| 67.66666 | 2.760191 | 3.278245 | -22.08827 |
| 67.68333 | 2.592761 | 2.85423  | -22.1437  |
| 67.7     | 2.670427 | 2.831212 | -22.20605 |
| 67.71667 | 2.712202 | 2.808797 | -22.26148 |
| 67.73333 | 2.371832 | 2.849367 | -22.32384 |
| 67.75    | 2.586637 | 2.845107 | -22.37234 |
| 67.76667 | 2.437316 | 2.488403 | -22.41391 |
| 67.78333 | 2.64038  | 2.646229 | -22.45548 |
| 67.8     | 2.258199 | 2.443177 | -22.47627 |
| 67.81667 | 2.867277 | 2.542351 | -22.50398 |
| 67.83334 | 2.903669 | 2.479389 | -22.5317  |
| 67.85    | 2.407717 | 2.47032  | -22.55248 |
| 67.86667 | 2.377521 | 2.289832 | -22.58713 |
| 67.88333 | 2.771729 | 2.136454 | -22.63563 |
| 67.9     | 2.628723 | 2.050758 | -22.6772  |
| 67.91666 | 2.521082 | 2.037024 | -22.71877 |
| 67.93333 | 2.604579 | 2.14528  | -22.74648 |
| 67.95    | 2.700294 | 1.956015 | -22.7742  |
| 67.96667 | 2.449468 | 1.870247 | -22.80191 |
| 67.98333 | 2.706042 | 1.978439 | -22.8227  |
| 68       | 2.550997 | 1.798072 | -22.85041 |
| 68.01667 | 2.562798 | 1.76653  | -22.87813 |
| 68.03333 | 2.574831 | 1.788963 | -22.89198 |

|          |          |           |           |
|----------|----------|-----------|-----------|
| 68.05    | 2.6166   | 1.685395  | -22.91277 |
| 68.06667 | 2.538928 | 1.779948  | -22.93356 |
| 68.08334 | 2.311882 | 1.608772  | -22.95434 |
| 68.1     | 2.335709 | 1.477899  | -22.98898 |
| 68.11667 | 2.431156 | 1.486869  | -23.0167  |
| 68.13333 | 2.461173 | 1.604201  | -23.03748 |
| 68.15    | 2.56275  | 1.369702  | -23.0652  |
| 68.16666 | 2.425456 | 1.441796  | -23.09984 |
| 68.18333 | 2.73597  | 1.441832  | -23.12063 |
| 68.2     | 2.359829 | 1.423717  | -23.1137  |
| 68.21667 | 2.389482 | 1.279607  | -23.12063 |
| 68.23333 | 2.759726 | 1.39671   | -23.14141 |
| 68.25    | 2.527241 | 1.405706  | -23.14834 |
| 68.26667 | 2.437268 | 1.293084  | -23.14141 |
| 68.28333 | 2.568719 | 1.315561  | -23.1622  |
| 68.3     | 2.592689 | 1.207419  | -23.19684 |
| 68.31667 | 2.550902 | 1.229937  | -23.2107  |
| 68.33334 | 2.443291 | 1.256958  | -23.22455 |
| 68.35    | 2.473146 | 1.288486  | -23.23841 |
| 68.36667 | 2.556763 | 1.320096  | -23.26613 |
| 68.38333 | 2.42548  | 1.171388  | -23.3077  |
| 68.4     | 2.335691 | 1.184887  | -23.32848 |
| 68.41666 | 2.479002 | 1.184833  | -23.32848 |
| 68.43333 | 2.305907 | 1.085727  | -23.33541 |
| 68.45    | 2.640332 | 1.085691  | -23.32155 |
| 68.46667 | 2.329854 | 1.045153  | -23.28691 |
| 68.48333 | 2.819515 | 1.144254  | -23.27998 |
| 68.5     | 2.533109 | 0.9955729 | -23.28691 |
| 68.51667 | 2.395546 | 1.229847  | -23.3077  |
| 68.53333 | 2.550711 | 1.013638  | -23.32848 |
| 68.55    | 2.604663 | 0.8558794 | -23.32155 |
| 68.56667 | 2.258157 | 1.018087  | -23.31463 |
| 68.58334 | 2.269886 | 0.927964  | -23.34927 |
| 68.6     | 2.610381 | 0.9504688 | -23.38391 |
| 68.61667 | 2.610601 | 1.094665  | -23.38391 |
| 68.63333 | 2.20445  | 0.9009655 | -23.37005 |
| 68.65    | 2.323527 | 0.9820241 | -23.36313 |
| 68.66666 | 2.586631 | 0.797294  | -23.37698 |
| 68.68333 | 2.616594 | 0.9009025 | -23.39084 |
| 68.7     | 2.323897 | 0.8017923 | -23.38391 |
| 68.71667 | 2.5447   | 0.9685023 | -23.38391 |
| 68.73333 | 2.515006 | 0.9324623 | -23.39084 |
| 68.75    | 2.592606 | 0.8874077 | -23.39777 |
| 68.76667 | 2.306003 | 0.8558614 | -23.41855 |
| 68.78333 | 2.365446 | 0.8378459 | -23.44627 |
| 68.8     | 2.479038 | 0.8648579 | -23.46013 |
| 68.81667 | 2.443356 | 0.8198078 | -23.44627 |



|          |          |           |           |
|----------|----------|-----------|-----------|
| 68.83334 | 2.222153 | 0.8378233 | -23.43241 |
| 68.85    | 2.568581 | 0.8423261 | -23.43241 |
| 68.86667 | 2.467196 | 0.7387312 | -23.43934 |
| 68.88333 | 2.562762 | 0.7206571 | -23.43934 |
| 68.9     | 2.425468 | 0.7882435 | -23.43934 |
| 68.91666 | 2.287852 | 0.6756521 | -23.44627 |
| 68.93333 | 2.47899  | 0.7386997 | -23.44627 |
| 68.95    | 2.276004 | 0.6666105 | -23.43241 |
| 68.96667 | 2.562618 | 0.9369065 | -23.4532  |
| 68.98333 | 2.383543 | 0.7567557 | -23.47398 |
| 69       | 2.377527 | 0.7252049 | -23.48784 |
| 69.01667 | 2.365571 | 0.6170622 | -23.5017  |
| 69.03333 | 2.311733 | 0.806232  | -23.50863 |
| 69.05    | 2.664243 | 0.806295  | -23.51555 |
| 69.06667 | 2.461328 | 0.7026641 | -23.5017  |
| 69.08334 | 2.407394 | 0.6531113 | -23.49477 |
| 69.1     | 2.335638 | 0.7386546 | -23.50863 |
| 69.11667 | 2.317761 | 0.7161904 | -23.52941 |
| 69.13333 | 2.467022 | 0.6080432 | -23.54327 |
| 69.15    | 2.287953 | 0.6981568 | -23.53634 |
| 69.16666 | 2.210108 | 0.6305615 | -23.52248 |
| 69.18333 | 2.389249 | 0.6485725 | -23.5017  |
| 69.2     | 2.479103 | 0.761227  | -23.48784 |
| 69.21667 | 2.891343 | 0.7477007 | -23.49477 |
| 69.23333 | 2.258366 | 0.6981614 | -23.53634 |
| 69.25    | 2.341594 | 0.7161769 | -23.56405 |
| 69.26667 | 2.568569 | 0.5494848 | -23.55713 |
| 69.28333 | 2.252141 | 0.6620672 | -23.54327 |
| 69.3     | 2.33565  | 0.6305795 | -23.54327 |
| 69.31667 | 2.347545 | 0.6305569 | -23.55713 |
| 69.33334 | 2.365529 | 0.5900367 | -23.55713 |
| 69.35    | 2.120577 | 0.657596  | -23.52941 |
| 69.36667 | 2.371397 | 0.6350597 | -23.5017  |
| 69.38333 | 2.329681 | 0.7386681 | -23.5017  |
| 69.4     | 2.484899 | 0.5450046 | -23.51555 |
| 69.41666 | 2.520968 | 0.5945169 | -23.51555 |
| 69.43333 | 2.108782 | 0.5494758 | -23.50863 |
| 69.45    | 2.275669 | 0.5990242 | -23.51555 |
| 69.46667 | 2.305764 | 0.7071218 | -23.52248 |
| 69.48333 | 2.293838 | 0.6891468 | -23.51555 |
| 69.5     | 2.377377 | 0.6080612 | -23.51555 |
| 69.51667 | 2.449194 | 0.6936136 | -23.51555 |
| 69.53333 | 2.401455 | 0.5630021 | -23.52941 |
| 69.55    | 2.461102 | 0.6350642 | -23.53634 |
| 69.56667 | 2.377479 | 0.6215559 | -23.52941 |
| 69.58334 | 2.413447 | 0.5494758 | -23.52248 |
| 69.6     | 2.22814  | 0.4368709 | -23.51555 |

|          |          |           |           |
|----------|----------|-----------|-----------|
| 69.61667 | 2.431168 | 0.6260227 | -23.52248 |
| 69.63333 | 2.413369 | 0.6350687 | -23.53634 |
| 69.65    | 2.293838 | 0.5855294 | -23.54327 |
| 69.66666 | 2.359549 | 0.5539651 | -23.5502  |
| 69.68333 | 2.258008 | 0.6620762 | -23.55713 |
| 69.7     | 2.437071 | 0.6125684 | -23.54327 |
| 69.71667 | 2.4074   | 0.5584993 | -23.52941 |
| 69.73333 | 2.491005 | 0.666579  | -23.52941 |
| 69.75    | 2.473093 | 0.5990286 | -23.52248 |
| 69.76667 | 2.526979 | 0.5134583 | -23.52941 |
| 69.78333 | 2.676282 | 0.5764878 | -23.55713 |
| 69.8     | 2.288096 | 0.5314693 | -23.56405 |
| 69.81667 | 2.467016 | 0.5404658 | -23.5502  |
| 69.83334 | 2.323849 | 0.5314378 | -23.52941 |
| 69.85    | 2.341535 | 0.5044393 | -23.5502  |
| 69.86667 | 2.305788 | 0.4413511 | -23.56405 |
| 69.88333 | 2.443153 | 0.472902  | -23.56405 |
| 69.9     | 2.497004 | 0.5314288 | -23.5502  |
| 69.91666 | 2.347701 | 0.5359676 | -23.52248 |
| 69.93333 | 2.174385 | 0.5044258 | -23.52248 |
| 69.95    | 2.628132 | 0.4864057 | -23.55713 |
| 69.96667 | 2.539    | 0.5359495 | -23.59177 |
| 69.98333 | 2.335841 | 0.5179476 | -23.60563 |
| 70       | 2.395314 | 0.4773957 | -23.60563 |
| 70.01667 | 2.353586 | 0.5539696 | -23.5987  |
| 70.03333 | 2.419314 | 0.4774047 | -23.57791 |
| 70.05    | 2.084812 | 0.481903  | -23.57098 |
| 70.06667 | 2.192148 | 0.526935  | -23.58484 |
| 70.08334 | 2.245897 | 0.5044393 | -23.5987  |
| 70.1     | 2.389315 | 0.5359586 | -23.59177 |
| 70.11667 | 2.198308 | 0.4593802 | -23.60563 |
| 70.13333 | 2.305674 | 0.4368529 | -23.62641 |
| 70.15    | 2.311679 | 0.5359405 | -23.63334 |
| 70.16666 | 2.329705 | 0.508933  | -23.62641 |
| 70.18333 | 2.425199 | 0.5044212 | -23.61948 |
| 70.2     | 2.544706 | 0.5539741 | -23.62641 |
| 70.21667 | 2.204426 | 0.4774182 | -23.6472  |
| 70.23333 | 2.413208 | 0.4413556 | -23.6472  |
| 70.25    | 2.514976 | 0.5314378 | -23.63334 |
| 70.26667 | 2.264072 | 0.4188509 | -23.64027 |
| 70.28333 | 2.234007 | 0.4323501 | -23.66105 |
| 70.3     | 2.269892 | 0.4728839 | -23.68184 |
| 70.31667 | 2.371474 | 0.4368529 | -23.67491 |
| 70.33334 | 2.478954 | 0.5044168 | -23.66105 |
| 70.35    | 2.371641 | 0.4233536 | -23.6472  |
| 70.36667 | 2.461078 | 0.5449415 | -23.64027 |
| 70.38333 | 2.258061 | 0.5269576 | -23.63334 |

|          |          |           |           |
|----------|----------|-----------|-----------|
| 70.4     | 2.472926 | 0.4323592 | -23.65413 |
| 70.41666 | 2.359722 | 0.4143346 | -23.67491 |
| 70.43333 | 2.443213 | 0.4053246 | -23.66105 |
| 70.45    | 2.048945 | 0.4008218 | -23.64027 |
| 70.46667 | 2.269712 | 0.4413556 | -23.6472  |
| 70.48333 | 2.32367  | 0.5359405 | -23.66105 |
| 70.5     | 2.222052 | 0.5134403 | -23.67491 |
| 70.51667 | 2.496908 | 0.4413556 | -23.66798 |
| 70.53333 | 2.204348 | 0.3873136 | -23.66798 |
| 70.55    | 2.234037 | 0.3918028 | -23.65413 |
| 70.56667 | 2.22201  | 0.4548729 | -23.66105 |
| 70.58334 | 2.353484 | 0.4683812 | -23.68184 |
| 70.6     | 2.467106 | 0.3287642 | -23.68184 |
| 70.61667 | 2.305865 | 0.4458494 | -23.67491 |
| 70.63333 | 2.365392 | 0.4098319 | -23.67491 |
| 70.65    | 2.335703 | 0.4548774 | -23.6957  |
| 70.66666 | 2.317767 | 0.4233401 | -23.70955 |
| 70.68333 | 2.544718 | 0.4278339 | -23.70955 |
| 70.7     | 2.18643  | 0.4188464 | -23.70955 |
| 70.71667 | 2.425158 | 0.3918073 | -23.70955 |
| 70.73333 | 2.234097 | 0.3828108 | -23.70955 |
| 70.75    | 2.329585 | 0.4863832 | -23.71648 |
| 70.76667 | 2.383388 | 0.4368529 | -23.72341 |
| 70.78333 | 2.287887 | 0.3647908 | -23.75113 |
| 70.8     | 2.27586  | 0.4053201 | -23.75805 |
| 70.81667 | 2.126486 | 0.4323501 | -23.75113 |
| 70.83334 | 2.227967 | 0.4368439 | -23.7442  |
| 70.85    | 2.36544  | 0.4233356 | -23.7442  |
| 70.86667 | 2.449247 | 0.4188464 | -23.75113 |
| 70.88333 | 2.389393 | 0.4863967 | -23.7442  |
| 70.9     | 2.264042 | 0.3783081 | -23.7442  |
| 70.91666 | 2.233983 | 0.369289  | -23.7442  |
| 70.93333 | 2.413274 | 0.3377562 | -23.73727 |
| 70.95    | 2.347605 | 0.4143256 | -23.75805 |
| 70.96667 | 2.365565 | 0.4053246 | -23.76498 |
| 70.98333 | 2.210144 | 0.3782991 | -23.75805 |
| 71       | 2.478966 | 0.4098229 | -23.76498 |
| 71.01667 | 2.287887 | 0.3467708 | -23.78577 |
| 71.03333 | 2.138507 | 0.4008218 | -23.79963 |
| 71.05    | 2.359358 | 0.2927287 | -23.7927  |
| 71.06667 | 2.317767 | 0.4188149 | -23.79963 |
| 71.08334 | 2.198236 | 0.4683902 | -23.80655 |
| 71.1     | 2.024915 | 0.3377697 | -23.81348 |
| 71.11667 | 2.2936   | 0.3782856 | -23.81348 |
| 71.13333 | 2.281841 | 0.342268  | -23.7927  |
| 71.15    | 2.28784  | 0.3873001 | -23.7927  |
| 71.16666 | 2.335578 | 0.4188329 | -23.82041 |

|          |          |           |           |
|----------|----------|-----------|-----------|
| 71.18333 | 2.204217 | 0.4053246 | -23.8412  |
| 71.2     | 2.353449 | 0.3737963 | -23.84813 |
| 71.21667 | 2.281889 | 0.4503477 | -23.87584 |
| 71.23333 | 2.281835 | 0.3017387 | -23.90355 |
| 71.25    | 2.263863 | 0.369289  | -23.90355 |
| 71.26667 | 2.28781  | 0.3377652 | -23.88277 |
| 71.28333 | 2.323617 | 0.306228  | -23.88277 |
| 71.3     | 2.228104 | 0.3782856 | -23.8897  |
| 71.31667 | 2.347504 | 0.3377652 | -23.89663 |
| 71.33334 | 2.389452 | 0.2792069 | -23.8897  |
| 71.35    | 2.353592 | 0.3332535 | -23.87584 |
| 71.36667 | 2.198189 | 0.3422635 | -23.86198 |
| 71.38333 | 2.234019 | 0.3512735 | -23.86198 |
| 71.4     | 2.311643 | 0.2476831 | -23.86891 |
| 71.41666 | 2.377461 | 0.2521859 | -23.88277 |
| 71.43333 | 2.210269 | 0.3287417 | -23.87584 |
| 71.45    | 2.323581 | 0.2927197 | -23.88277 |
| 71.46667 | 2.198236 | 0.2972224 | -23.91741 |
| 71.48333 | 2.275795 | 0.3242435 | -23.95898 |
| 71.5     | 2.22805  | 0.324239  | -23.95205 |
| 71.51667 | 2.23994  | 0.2837187 | -23.93127 |
| 71.53333 | 2.078729 | 0.2882124 | -23.92434 |
| 71.55    | 2.192047 | 0.2927152 | -23.92434 |
| 71.56667 | 2.239946 | 0.3242435 | -23.94513 |
| 71.58334 | 2.048832 | 0.3017342 | -23.97284 |
| 71.6     | 2.09053  | 0.3197317 | -23.97284 |
| 71.61667 | 2.502704 | 0.342268  | -23.97284 |
| 71.63333 | 2.26412  | 0.3422545 | -23.97284 |
| 71.65    | 2.25787  | 0.2927287 | -23.99363 |
| 71.66666 | 2.407293 | 0.3647683 | -24.02827 |
| 71.68333 | 2.491017 | 0.2702059 | -24.05598 |
| 71.7     | 1.929528 | 0.369289  | -24.06291 |
| 71.71667 | 2.192023 | 0.3647773 | -24.06291 |
| 71.73333 | 2.317588 | 0.3377652 | -24.06984 |
| 71.75    | 2.251967 | 0.4053111 | -24.06984 |
| 71.76667 | 2.31769  | 0.3873091 | -24.0837  |
| 71.78333 | 2.096678 | 0.315247  | -24.11834 |
| 71.8     | 2.323533 | 0.3377562 | -24.13913 |
| 71.81667 | 2.472979 | 0.351269  | -24.10448 |
| 71.83334 | 2.323825 | 0.315247  | -24.06984 |
| 71.85    | 2.299801 | 0.3332535 | -24.0837  |
| 71.86667 | 2.114578 | 0.3467663 | -24.09756 |
| 71.88333 | 2.239863 | 0.3242435 | -24.09756 |
| 71.9     | 2.090601 | 0.2927242 | -24.09756 |
| 71.91666 | 2.108526 | 0.3737783 | -24.11834 |
| 71.93333 | 2.054741 | 0.3017297 | -24.14605 |
| 71.95    | 2.371242 | 0.3377562 | -24.15298 |

|          |          |           |           |
|----------|----------|-----------|-----------|
| 71.96667 | 2.192333 | 0.3377562 | -24.13913 |
| 71.98333 | 2.383281 | 0.3963056 | -24.13913 |
| 72       | 1.923487 | 0.2206666 | -24.13913 |
| 72.01667 | 2.275657 | 0.3197362 | -24.1322  |
| 72.03333 | 2.144356 | 0.2792114 | -24.13913 |
| 72.05    | 2.30568  | 0.2972179 | -24.15991 |
| 72.06667 | 2.180282 | 0.2927197 | -24.17377 |
| 72.08334 | 2.239982 | 0.2837096 | -24.17377 |
| 72.1     | 2.210049 | 0.2972224 | -24.18763 |
| 72.11667 | 2.078676 | 0.2972224 | -24.20148 |
| 72.13333 | 2.192118 | 0.2611959 | -24.20841 |
| 72.15    | 2.269814 | 0.2972179 | -24.21534 |
| 72.16666 | 2.234031 | 0.2837142 | -24.21534 |
| 72.18333 | 2.054795 | 0.2792069 | -24.20148 |
| 72.2     | 2.162185 | 0.2341703 | -24.19455 |
| 72.21667 | 2.257859 | 0.2837051 | -24.19455 |
| 72.23333 | 2.473021 | 0.2656986 | -24.20841 |
| 72.25    | 2.407388 | 0.2927197 | -24.22227 |
| 72.26667 | 2.329764 | 0.2882124 | -24.22227 |
| 72.28333 | 2.144416 | 0.2972224 | -24.2292  |
| 72.3     | 2.311649 | 0.2656986 | -24.24305 |
| 72.31667 | 2.32367  | 0.2431758 | -24.26384 |
| 72.33334 | 2.251937 | 0.2656941 | -24.28463 |
| 72.35    | 2.114602 | 0.2251603 | -24.28463 |
| 72.36667 | 2.502775 | 0.2746997 | -24.26384 |
| 72.38333 | 2.401443 | 0.2747042 | -24.27077 |
| 72.4     | 2.252021 | 0.2972179 | -24.29155 |
| 72.41666 | 2.210144 | 0.2927242 | -24.30541 |
| 72.43333 | 1.917387 | 0.3017252 | -24.31234 |
| 72.45    | 2.162137 | 0.2747042 | -24.31234 |
| 72.46667 | 2.042791 | 0.2296676 | -24.30541 |
| 72.48333 | 2.401187 | 0.2792024 | -24.29848 |
| 72.5     | 2.305746 | 0.2747087 | -24.29848 |
| 72.51667 | 2.13252  | 0.2702014 | -24.31927 |
| 72.53333 | 2.245903 | 0.3287372 | -24.34005 |
| 72.55    | 2.275825 | 0.2927287 | -24.34005 |
| 72.56667 | 2.257906 | 0.1801283 | -24.34005 |
| 72.58334 | 2.013031 | 0.2566796 | -24.34698 |
| 72.6     | 2.096457 | 0.2882169 | -24.35391 |
| 72.61667 | 2.239827 | 0.2656896 | -24.35391 |
| 72.63333 | 2.054836 | 0.2476831 | -24.35391 |
| 72.65    | 2.204074 | 0.2296631 | -24.36084 |
| 72.66666 | 2.251908 | 0.2206576 | -24.36084 |
| 72.68333 | 2.156306 | 0.2521814 | -24.36084 |
| 72.7     | 2.102557 | 0.2161548 | -24.38163 |
| 72.71667 | 2.227949 | 0.2521814 | -24.40241 |
| 72.73333 | 2.114506 | 0.2476786 | -24.40241 |

|          |          |           |           |
|----------|----------|-----------|-----------|
| 72.75    | 2.036811 | 0.2566886 | -24.40241 |
| 72.76667 | 2.102479 | 0.2837051 | -24.40241 |
| 72.78333 | 2.26976  | 0.2611914 | -24.40934 |
| 72.8     | 2.013037 | 0.2116521 | -24.4232  |
| 72.81667 | 2.156192 | 0.2566796 | -24.43705 |
| 72.83334 | 2.192118 | 0.2702059 | -24.43013 |
| 72.85    | 2.060769 | 0.2882079 | -24.43705 |
| 72.86667 | 2.174188 | 0.1891338 | -24.45091 |
| 72.88333 | 2.222022 | 0.2566841 | -24.45784 |
| 72.9     | 2.198195 | 0.2566841 | -24.46477 |
| 72.91666 | 1.869565 | 0.2071493 | -24.47863 |
| 72.93333 | 2.096355 | 0.2431713 | -24.48555 |
| 72.95    | 2.126462 | 0.2386731 | -24.49248 |
| 72.96667 | 2.287625 | 0.2251603 | -24.49941 |
| 72.98333 | 2.371444 | 0.1756255 | -24.50634 |
| 73       | 2.054902 | 0.2431758 | -24.5202  |
| 73.01667 | 2.281692 | 0.1981393 | -24.50634 |
| 73.03333 | 2.114578 | 0.2251603 | -24.50634 |
| 73.05    | 2.120415 | 0.2792024 | -24.51327 |
| 73.06667 | 2.054759 | 0.2792069 | -24.51327 |
| 73.08334 | 2.215922 | 0.306228  | -24.50634 |
| 73.1     | 2.216125 | 0.2521859 | -24.49941 |
| 73.11667 | 2.192118 | 0.2611914 | -24.50634 |
| 73.13333 | 2.072755 | 0.2611914 | -24.49941 |
| 73.15    | 2.114435 | 0.2206621 | -24.49941 |
| 73.16666 | 2.108526 | 0.1801238 | -24.5202  |
| 73.18333 | 2.13834  | 0.2656896 | -24.53405 |
| 73.2     | 2.066684 | 0.2116521 | -24.5202  |
| 73.21667 | 2.108442 | 0.2116476 | -24.52712 |
| 73.23333 | 2.305579 | 0.2341613 | -24.52712 |
| 73.25    | 2.126539 | 0.1576145 | -24.5202  |
| 73.26667 | 2.180205 | 0.2116476 | -24.50634 |
| 73.28333 | 2.036799 | 0.2296676 | -24.49941 |
| 73.3     | 1.947207 | 0.1350917 | -24.50634 |
| 73.31667 | 1.970927 | 0.1981348 | -24.5202  |
| 73.33334 | 2.060656 | 0.1981393 | -24.5202  |
| 73.35    | 2.042738 | 0.2206531 | -24.51327 |
| 73.36667 | 2.150289 | 0.2341658 | -24.50634 |
| 73.38333 | 2.180193 | 0.1936365 | -24.51327 |
| 73.4     | 2.132431 | 0.1891338 | -24.5202  |
| 73.41666 | 2.41316  | 0.2116476 | -24.52712 |
| 73.43333 | 1.965233 | 0.2026465 | -24.54791 |
| 73.45    | 2.281674 | 0.2431713 | -24.55484 |
| 73.46667 | 2.347581 | 0.1891383 | -24.53405 |
| 73.48333 | 2.090703 | 0.2521769 | -24.52712 |
| 73.5     | 2.377318 | 0.2026465 | -24.54098 |
| 73.51667 | 2.078759 | 0.1801283 | -24.54791 |

|          |          |           |           |
|----------|----------|-----------|-----------|
| 73.53333 | 2.126336 | 0.175621  | -24.54791 |
| 73.55    | 2.233948 | 0.1846265 | -24.56177 |
| 73.56667 | 2.066762 | 0.1801283 | -24.57562 |
| 73.58334 | 2.26976  | 0.2116476 | -24.58255 |
| 73.6     | 2.335602 | 0.2071448 | -24.5687  |
| 73.61667 | 1.971226 | 0.1936365 | -24.5687  |
| 73.63333 | 2.102437 | 0.2386686 | -24.57562 |
| 73.65    | 2.13837  | 0.1801283 | -24.58255 |
| 73.66666 | 2.048712 | 0.2341613 | -24.59641 |
| 73.68333 | 2.395176 | 0.2161593 | -24.60334 |
| 73.7     | 2.066846 | 0.184631  | -24.58948 |
| 73.71667 | 2.102473 | 0.193632  | -24.59641 |
| 73.73333 | 2.048724 | 0.1891338 | -24.61027 |
| 73.75    | 1.994993 | 0.193632  | -24.60334 |
| 73.76667 | 2.102384 | 0.2341658 | -24.58255 |
| 73.78333 | 2.114536 | 0.2251603 | -24.58255 |
| 73.8     | 2.054693 | 0.2251603 | -24.59641 |
| 73.81667 | 2.036775 | 0.15761   | -24.6172  |
| 73.83334 | 2.090512 | 0.2296631 | -24.62412 |
| 73.85    | 1.905366 | 0.2837006 | -24.62412 |
| 73.86667 | 2.227823 | 0.2476876 | -24.61027 |
| 73.88333 | 2.180234 | 0.16662   | -24.59641 |
| 73.9     | 2.150349 | 0.2566751 | -24.60334 |
| 73.91666 | 2.072647 | 0.1576145 | -24.59641 |
| 73.93333 | 2.102473 | 0.1531072 | -24.58948 |
| 73.95    | 2.180175 | 0.1801238 | -24.60334 |
| 73.96667 | 2.35349  | 0.193632  | -24.62412 |
| 73.98333 | 2.186299 | 0.202642  | -24.6172  |
| 74       | 2.275783 | 0.2341703 | -24.59641 |
| 74.01667 | 2.281829 | 0.202642  | -24.59641 |
| 74.03333 | 2.108585 | 0.2116476 | -24.61027 |
| 74.05    | 2.18615  | 0.2206576 | -24.60334 |
| 74.06667 | 2.108555 | 0.2161503 | -24.60334 |
| 74.08334 | 2.341403 | 0.2161548 | -24.60334 |
| 74.1     | 2.156491 | 0.1891293 | -24.6172  |
| 74.11667 | 2.108484 | 0.1801283 | -24.63798 |
| 74.13333 | 1.989007 | 0.202642  | -24.63105 |
| 74.15    | 2.281585 | 0.1486    | -24.6172  |
| 74.16666 | 2.204193 | 0.1801238 | -24.6172  |
| 74.18333 | 2.168327 | 0.2296631 | -24.63105 |
| 74.2     | 2.174158 | 0.139599  | -24.61027 |
| 74.21667 | 2.156318 | 0.1846265 | -24.59641 |
| 74.23333 | 2.11453  | 0.2116476 | -24.61027 |
| 74.25    | 2.012918 | 0.15761   | -24.64491 |
| 74.26667 | 2.036709 | 0.202642  | -24.65877 |
| 74.28333 | 1.983002 | 0.2251603 | -24.64491 |
| 74.3     | 2.239845 | 0.2071493 | -24.63105 |

|          |          |           |           |
|----------|----------|-----------|-----------|
| 74.31667 | 2.216095 | 0.184631  | -24.63798 |
| 74.33334 | 2.38334  | 0.1666155 | -24.64491 |
| 74.35    | 2.084782 | 0.1531027 | -24.64491 |
| 74.36667 | 2.048736 | 0.202642  | -24.64491 |
| 74.38333 | 2.096475 | 0.1395945 | -24.65877 |
| 74.4     | 2.156294 | 0.175621  | -24.68648 |
| 74.41666 | 2.114476 | 0.2386686 | -24.68648 |
| 74.43333 | 2.192136 | 0.1350962 | -24.67262 |
| 74.45    | 2.156312 | 0.166611  | -24.67955 |
| 74.46667 | 2.144338 | 0.193632  | -24.69341 |
| 74.48333 | 2.084662 | 0.1981393 | -24.70727 |
| 74.5     | 1.953176 | 0.1801283 | -24.72112 |
| 74.51667 | 2.024736 | 0.1576055 | -24.7142  |
| 74.53333 | 2.341403 | 0.2296631 | -24.70034 |
| 74.55    | 2.114596 | 0.1981393 | -24.72112 |
| 74.56667 | 2.311554 | 0.1936365 | -24.73498 |
| 74.58334 | 2.090709 | 0.184631  | -24.72805 |
| 74.6     | 2.144326 | 0.1936365 | -24.73498 |
| 74.61667 | 2.150307 | 0.1846265 | -24.74191 |
| 74.63333 | 2.228033 | 0.1891338 | -24.73498 |
| 74.65    | 2.162292 | 0.2386641 | -24.73498 |
| 74.66666 | 2.413178 | 0.2161593 | -24.74191 |
| 74.68333 | 2.108669 | 0.1531072 | -24.72805 |
| 74.7     | 2.036799 | 0.1981348 | -24.7142  |
| 74.71667 | 2.012876 | 0.1350917 | -24.72112 |
| 74.73333 | 2.000849 | 0.1801238 | -24.73498 |
| 74.75    | 2.090506 | 0.1981348 | -24.74191 |
| 74.76667 | 2.168207 | 0.1441017 | -24.74884 |
| 74.78333 | 1.989043 | 0.15761   | -24.76962 |
| 74.8     | 2.209959 | 0.2161503 | -24.79734 |
| 74.81667 | 2.024921 | 0.15761   | -24.80427 |
| 74.83334 | 2.108454 | 0.2071448 | -24.76962 |
| 74.85    | 2.251866 | 0.1621127 | -24.74884 |
| 74.86667 | 2.132466 | 0.2161503 | -24.75577 |
| 74.88333 | 2.21009  | 0.1801283 | -24.74884 |
| 74.9     | 2.150325 | 0.2251558 | -24.72112 |
| 74.91666 | 2.263803 | 0.2071493 | -24.72805 |
| 74.93333 | 2.096636 | 0.1891338 | -24.75577 |
| 74.95    | 2.233965 | 0.1621127 | -24.77655 |
| 74.96667 | 2.054783 | 0.2341613 | -24.78348 |
| 74.98333 | 2.114411 | 0.2341703 | -24.78348 |
| 75       | 2.269742 | 0.1486045 | -24.79041 |
| 75.01667 | 1.989114 | 0.2026375 | -24.77655 |
| 75.03333 | 2.138292 | 0.1621127 | -24.75577 |
| 75.05    | 2.198057 | 0.1711182 | -24.73498 |
| 75.06667 | 2.078688 | 0.1350917 | -24.72805 |
| 75.08334 | 2.04876  | 0.1801192 | -24.74884 |



|          |          |           |           |
|----------|----------|-----------|-----------|
| 75.1     | 1.977057 | 0.2161503 | -24.77655 |
| 75.11667 | 2.102372 | 0.139599  | -24.77655 |
| 75.13333 | 2.006967 | 0.1891293 | -24.76962 |
| 75.15    | 2.21591  | 0.1531072 | -24.78348 |
| 75.16666 | 2.204175 | 0.1486045 | -24.79041 |
| 75.18333 | 1.995023 | 0.175621  | -24.79041 |
| 75.2     | 1.971029 | 0.1125779 | -24.79041 |
| 75.21667 | 1.959067 | 0.1395945 | -24.79041 |
| 75.23333 | 1.988911 | 0.1711182 | -24.79041 |
| 75.25    | 2.209959 | 0.1486    | -24.78348 |
| 75.26667 | 2.108567 | 0.1981348 | -24.76962 |
| 75.28333 | 2.26375  | 0.1756255 | -24.77655 |
| 75.3     | 1.989102 | 0.1711137 | -24.79734 |
| 75.31667 | 2.084543 | 0.1531072 | -24.8112  |
| 75.33334 | 2.054687 | 0.1846265 | -24.80427 |
| 75.35    | 2.365303 | 0.1170807 | -24.79734 |
| 75.36667 | 2.19829  | 0.1891293 | -24.80427 |
| 75.38333 | 1.917346 | 0.1440972 | -24.79041 |
| 75.4     | 2.08446  | 0.2296586 | -24.77655 |
| 75.41666 | 2.144344 | 0.1531072 | -24.78348 |
| 75.43333 | 2.287738 | 0.175621  | -24.79734 |
| 75.45    | 2.162322 | 0.1305889 | -24.78348 |
| 75.46667 | 1.839716 | 0.1846265 | -24.79041 |
| 75.48333 | 2.084412 | 0.211643  | -24.80427 |
| 75.5     | 2.192076 | 0.184631  | -24.79734 |
| 75.51667 | 2.156336 | 0.139599  | -24.80427 |
| 75.53333 | 2.138405 | 0.1170762 | -24.79734 |
| 75.55    | 2.096552 | 0.1531027 | -24.79041 |
| 75.56667 | 2.054693 | 0.1395945 | -24.78348 |
| 75.58334 | 2.048676 | 0.1440972 | -24.76962 |
| 75.6     | 1.93521  | 0.175621  | -24.74191 |
| 75.61667 | 1.994916 | 0.2296586 | -24.75577 |
| 75.63333 | 2.186066 | 0.2296631 | -24.78348 |
| 75.65    | 2.084656 | 0.139599  | -24.79041 |
| 75.66666 | 2.084579 | 0.1260862 | -24.80427 |
| 75.68333 | 2.024837 | 0.1711182 | -24.82505 |
| 75.7     | 2.102497 | 0.1305889 | -24.83198 |
| 75.71667 | 1.971047 | 0.1305889 | -24.81812 |
| 75.73333 | 2.16813  | 0.202642  | -24.79734 |
| 75.75    | 2.204193 | 0.1981348 | -24.80427 |
| 75.76667 | 2.054717 | 0.1981393 | -24.80427 |
| 75.78333 | 2.18615  | 0.175621  | -24.80427 |
| 75.8     | 2.108526 | 0.1936365 | -24.81812 |
| 75.81667 | 2.13834  | 0.1891293 | -24.81812 |
| 75.83334 | 2.120421 | 0.1801283 | -24.79734 |
| 75.85    | 1.863585 | 0.1215834 | -24.78348 |
| 75.86667 | 2.126223 | 0.1756165 | -24.77655 |

|          |          |            |           |
|----------|----------|------------|-----------|
| 75.88333 | 2.018958 | 0.1981393  | -24.76962 |
| 75.9     | 2.05461  | 0.175621   | -24.77655 |
| 75.91666 | 1.977069 | 0.1621127  | -24.78348 |
| 75.93333 | 2.215892 | 0.1621127  | -24.79041 |
| 75.95    | 2.013025 | 0.1486     | -24.79734 |
| 75.96667 | 2.180037 | 0.1621127  | -24.80427 |
| 75.98333 | 2.066726 | 0.1801238  | -24.78348 |
| 76       | 2.036739 | 0.1756255  | -24.7627  |
| 76.01667 | 1.994993 | 0.1486     | -24.77655 |
| 76.03333 | 2.269683 | 0.1486045  | -24.79041 |
| 76.05    | 2.359381 | 0.1846265  | -24.78348 |
| 76.06667 | 2.060901 | 0.1395945  | -24.7627  |
| 76.08334 | 1.947237 | 0.15761    | -24.7627  |
| 76.1     | 2.227842 | 0.1891293  | -24.78348 |
| 76.11667 | 1.809818 | 0.1666155  | -24.79041 |
| 76.13333 | 2.078473 | 0.1486045  | -24.77655 |
| 76.15    | 2.084597 | 0.09456238 | -24.78348 |
| 76.16666 | 2.156246 | 0.166611   | -24.80427 |
| 76.18333 | 2.138345 | 0.15761    | -24.82505 |
| 76.2     | 2.180211 | 0.1801238  | -24.82505 |
| 76.21667 | 2.072665 | 0.1260862  | -24.81812 |
| 76.23333 | 2.108436 | 0.166611   | -24.80427 |
| 76.25    | 2.120415 | 0.1531072  | -24.79041 |
| 76.26667 | 1.989072 | 0.1395945  | -24.78348 |
| 76.28333 | 2.096403 | 0.1395945  | -24.77655 |
| 76.3     | 2.108514 | 0.1576055  | -24.76962 |
| 76.31667 | 2.078574 | 0.1170807  | -24.76962 |
| 76.33334 | 2.227949 | 0.1621127  | -24.78348 |
| 76.35    | 1.959228 | 0.1395945  | -24.79734 |
| 76.36667 | 2.120314 | 0.1170807  | -24.79041 |
| 76.38333 | 2.030836 | 0.1846265  | -24.7627  |
| 76.4     | 2.174117 | 0.1846265  | -24.74884 |
| 76.41666 | 1.929361 | 0.139599   | -24.75577 |
| 76.43333 | 1.970993 | 0.1711182  | -24.75577 |
| 76.45    | 2.144183 | 0.1801238  | -24.74191 |
| 76.46667 | 2.120475 | 0.1666155  | -24.74884 |
| 76.48333 | 2.084579 | 0.211643   | -24.74884 |
| 76.5     | 2.168219 | 0.202642   | -24.74191 |
| 76.51667 | 2.007003 | 0.1891338  | -24.75577 |
| 76.53333 | 2.060632 | 0.1170807  | -24.79041 |
| 76.55    | 2.090488 | 0.1440972  | -24.80427 |
| 76.56667 | 2.090559 | 0.1711182  | -24.81812 |
| 76.58334 | 2.060722 | 0.1666155  | -24.81812 |
| 76.6     | 2.096463 | 0.1711182  | -24.78348 |
| 76.61667 | 1.977099 | 0.1350917  | -24.74884 |
| 76.63333 | 2.012786 | 0.1846265  | -24.74884 |
| 76.65    | 2.03083  | 0.1440972  | -24.77655 |

|          |          |            |           |
|----------|----------|------------|-----------|
| 76.66666 | 1.988971 | 0.1531027  | -24.80427 |
| 76.68333 | 2.096445 | 0.1621127  | -24.81812 |
| 76.7     | 2.180163 | 0.1305889  | -24.81812 |
| 76.71667 | 2.030866 | 0.1215834  | -24.79041 |
| 76.73333 | 2.132329 | 0.1125734  | -24.76962 |
| 76.75    | 2.132377 | 0.166611   | -24.7627  |
| 76.76667 | 2.048772 | 0.1621082  | -24.77655 |
| 76.78333 | 2.162221 | 0.1801238  | -24.8112  |
| 76.8     | 1.905366 | 0.1350962  | -24.80427 |
| 76.81667 | 1.803736 | 0.1981348  | -24.77655 |
| 76.83334 | 2.162054 | 0.1891338  | -24.7627  |
| 76.85    | 1.971142 | 0.2116476  | -24.77655 |
| 76.86667 | 2.221849 | 0.16662    | -24.79041 |
| 76.88333 | 2.084704 | 0.09005962 | -24.78348 |
| 76.9     | 1.935252 | 0.1350872  | -24.79734 |
| 76.91666 | 1.929152 | 0.1531027  | -24.79041 |
| 76.93333 | 2.102455 | 0.1215834  | -24.7627  |
| 76.95    | 1.965102 | 0.1395945  | -24.74884 |
| 76.96667 | 2.018737 | 0.1440972  | -24.75577 |
| 76.98333 | 2.072599 | 0.1440972  | -24.75577 |
| 77       | 2.060698 | 0.175621   | -24.74191 |
| 77.01667 | 2.084573 | 0.1260862  | -24.74884 |
| 77.03333 | 1.899415 | 0.1395945  | -24.74884 |
| 77.05    | 2.102342 | 0.1531072  | -24.74191 |
| 77.06667 | 1.899391 | 0.166611   | -24.75577 |
| 77.08334 | 2.012798 | 0.1350917  | -24.79041 |
| 77.1     | 2.030776 | 0.1666155  | -24.80427 |
| 77.11667 | 2.221915 | 0.1486     | -24.81812 |
| 77.13333 | 1.977159 | 0.1395945  | -24.81812 |
| 77.15    | 1.851534 | 0.175621   | -24.78348 |
| 77.16666 | 2.191957 | 0.1350917  | -24.74884 |
| 77.18333 | 2.12642  | 0.1846265  | -24.74884 |
| 77.2     | 2.06669  | 0.1305889  | -24.77655 |
| 77.21667 | 1.905354 | 0.1215834  | -24.80427 |
| 77.23333 | 2.102401 | 0.1801192  | -24.81812 |
| 77.25    | 1.988935 | 0.1125779  | -24.81812 |
| 77.26667 | 1.994975 | 0.1531027  | -24.79041 |
| 77.28333 | 1.773892 | 0.15761    | -24.76962 |
| 77.3     | 2.126217 | 0.1440972  | -24.7627  |
| 77.31667 | 2.000968 | 0.1305889  | -24.77655 |
| 77.33334 | 2.108394 | 0.1350917  | -24.8112  |
| 77.35    | 2.180103 | 0.1621082  | -24.80427 |
| 77.36667 | 1.923416 | 0.1395945  | -24.77655 |
| 77.38333 | 1.994856 | 0.1576055  | -24.7627  |
| 77.4     | 2.048671 | 0.1305889  | -24.77655 |
| 77.41666 | 2.090554 | 0.1080706  | -24.79041 |
| 77.43333 | 1.893399 | 0.1485955  | -24.79734 |

|          |          |            |           |
|----------|----------|------------|-----------|
| 77.45    | 1.833639 | 0.1260862  | -24.79041 |
| 77.46667 | 1.97088  | 0.1350872  | -24.7627  |
| 77.48333 | 2.030782 | 0.1486     | -24.74884 |
| 77.5     | 2.018857 | 0.1486     | -24.75577 |
| 77.51667 | 1.905259 | 0.1350917  | -24.75577 |
| 77.53333 | 1.911299 | 0.1440972  | -24.74191 |
| 77.55    | 1.875379 | 0.175621   | -24.74884 |
| 77.56667 | 2.126253 | 0.1531027  | -24.74884 |
| 77.58334 | 1.851629 | 0.1486     | -24.74191 |
| 77.6     | 1.988858 | 0.1666155  | -24.75577 |
| 77.61667 | 2.006877 | 0.1621127  | -24.79041 |
| 77.63333 | 1.959055 | 0.1350917  | -24.80427 |
| 77.65    | 2.251812 | 0.1576055  | -24.81812 |
| 77.66666 | 2.078694 | 0.2071448  | -24.81812 |
| 77.68333 | 2.144302 | 0.1621127  | -24.78348 |
| 77.7     | 2.096528 | 0.1395945  | -24.74884 |
| 77.71667 | 2.132407 | 0.1440972  | -24.74884 |
| 77.73333 | 2.066655 | 0.1801283  | -24.77655 |
| 77.75    | 1.941215 | 0.1711182  | -24.80427 |
| 77.76667 | 1.875391 | 0.1666155  | -24.81812 |
| 77.78333 | 2.018743 | 0.1170807  | -24.81812 |
| 77.8     | 2.012918 | 0.1080706  | -24.79041 |
| 77.81667 | 1.994844 | 0.1756165  | -24.76962 |
| 77.83334 | 2.221897 | 0.1215834  | -24.7627  |
| 77.85    | 2.174308 | 0.166611   | -24.77655 |
| 77.86667 | 1.953152 | 0.1350917  | -24.8112  |
| 77.88333 | 2.054681 | 0.09906514 | -24.80427 |
| 77.9     | 2.132305 | 0.1305889  | -24.77655 |
| 77.91666 | 1.983098 | 0.1486     | -24.7627  |
| 77.93333 | 1.863507 | 0.1531072  | -24.77655 |
| 77.95    | 1.988852 | 0.1215834  | -24.79041 |
| 77.96667 | 1.797809 | 0.1621082  | -24.79734 |
| 77.98333 | 2.030591 | 0.175621   | -24.79041 |
| 78       | 2.042744 | 0.1080706  | -24.7627  |
| 78.01667 | 2.090554 | 0.1486     | -24.74884 |
| 78.03333 | 2.066667 | 0.1305889  | -24.75577 |
| 78.05    | 2.06065  | 0.1621127  | -24.75577 |
| 78.06667 | 2.054741 | 0.1125779  | -24.74191 |
| 78.08334 | 2.221891 | 0.09906514 | -24.74884 |
| 78.1     | 2.072737 | 0.13959    | -24.74884 |
| 78.11667 | 2.066648 | 0.1440972  | -24.74191 |
| 78.13333 | 2.054663 | 0.1395945  | -24.75577 |
| 78.15    | 1.953212 | 0.15761    | -24.79041 |
| 78.16666 | 2.078515 | 0.1260862  | -24.80427 |
| 78.18333 | 2.13828  | 0.1531027  | -24.81812 |
| 78.2     | 2.108526 | 0.1486     | -24.81812 |
| 78.21667 | 2.144279 | 0.15761    | -24.78348 |

|          |          |            |           |
|----------|----------|------------|-----------|
| 78.23333 | 2.204116 | 0.1170762  | -24.74884 |
| 78.25    | 2.198141 | 0.1486     | -24.74884 |
| 78.26667 | 2.216047 | 0.1531072  | -24.77655 |
| 78.28333 | 2.048772 | 0.1125779  | -24.80427 |
| 78.3     | 1.87551  | 0.1621082  | -24.81812 |
| 78.31667 | 2.042636 | 0.1441017  | -24.81812 |
| 78.33334 | 2.162179 | 0.1395945  | -24.79041 |
| 78.35    | 2.078676 | 0.1305889  | -24.76962 |
| 78.36667 | 1.923284 | 0.1711137  | -24.7627  |
| 78.38333 | 2.072528 | 0.1531072  | -24.77655 |
| 78.4     | 1.845672 | 0.1215834  | -24.8112  |
| 78.41666 | 1.988804 | 0.166611   | -24.80427 |
| 78.43333 | 1.839626 | 0.1666155  | -24.77655 |
| 78.45    | 2.132204 | 0.1531072  | -24.7627  |
| 78.46667 | 1.887543 | 0.1305889  | -24.77655 |
| 78.48333 | 1.982835 | 0.1035679  | -24.79041 |
| 78.5     | 1.827641 | 0.1846265  | -24.79734 |
| 78.51667 | 2.072486 | 0.1260862  | -24.79041 |
| 78.53333 | 2.060674 | 0.1305889  | -24.7627  |
| 78.55    | 2.048736 | 0.1395945  | -24.74884 |
| 78.56667 | 1.845643 | 0.1756165  | -24.75577 |
| 78.58334 | 1.994844 | 0.1080751  | -24.75577 |
| 78.6     | 1.857526 | 0.1080706  | -24.74191 |
| 78.61667 | 2.000825 | 0.1350872  | -24.74884 |
| 78.63333 | 1.99491  | 0.1260862  | -24.74884 |
| 78.65    | 2.036697 | 0.1350917  | -24.74191 |
| 78.66666 | 2.120379 | 0.1395945  | -24.75577 |
| 78.68333 | 2.198141 | 0.1576055  | -24.79041 |
| 78.7     | 1.923326 | 0.1486     | -24.80427 |
| 78.71667 | 2.03074  | 0.1531027  | -24.81812 |
| 78.73333 | 2.018767 | 0.1486045  | -24.81812 |
| 78.75    | 2.060668 | 0.1891293  | -24.78348 |
| 78.76667 | 2.000926 | 0.1621127  | -24.74884 |
| 78.78333 | 2.120373 | 0.1531027  | -24.74884 |
| 78.8     | 2.078676 | 0.05854033 | -24.77655 |
| 78.81667 | 1.971065 | 0.1215789  | -24.80427 |
| 78.83334 | 1.905259 | 0.1440972  | -24.81812 |
| 78.85    | 2.120314 | 0.1305889  | -24.81812 |
| 78.86667 | 2.120469 | 0.1486     | -24.79041 |
| 78.88333 | 2.012894 | 0.1621082  | -24.76962 |
| 78.9     | 2.012876 | 0.1260862  | -24.7627  |
| 78.91666 | 1.97698  | 0.1395945  | -24.77655 |
| 78.93333 | 2.156163 | 0.1666155  | -24.8112  |
| 78.95    | 1.995035 | 0.1531027  | -24.80427 |
| 78.96667 | 1.91725  | 0.1350917  | -24.77655 |
| 78.98333 | 2.042654 | 0.1486045  | -24.7627  |
| 79       | 1.977075 | 0.1305889  | -24.77655 |

|          |          |            |           |
|----------|----------|------------|-----------|
| 79.01667 | 1.851522 | 0.1621082  | -24.79041 |
| 79.03333 | 1.929164 | 0.1080751  | -24.79734 |
| 79.05    | 2.144159 | 0.1531027  | -24.79041 |
| 79.06667 | 1.953242 | 0.1666155  | -24.7627  |
| 79.08334 | 2.036679 | 0.139599   | -24.74884 |
| 79.1     | 2.006883 | 0.1576055  | -24.75577 |
| 79.11667 | 1.988935 | 0.1305889  | -24.75577 |
| 79.13333 | 1.929229 | 0.1260862  | -24.74191 |
| 79.15    | 2.078568 | 0.1035724  | -24.74884 |
| 79.16666 | 1.869476 | 0.1621082  | -24.74884 |
| 79.18333 | 1.785805 | 0.1531072  | -24.74191 |
| 79.2     | 1.935043 | 0.1215834  | -24.75577 |
| 79.21667 | 1.875468 | 0.1035679  | -24.79041 |
| 79.23333 | 2.07245  | 0.1035679  | -24.80427 |
| 79.25    | 2.048778 | 0.09906514 | -24.81812 |
| 79.26667 | 2.048748 | 0.1350917  | -24.81812 |
| 79.28333 | 2.072587 | 0.1125779  | -24.78348 |
| 79.3     | 1.881419 | 0.1260817  | -24.74884 |
| 79.31667 | 2.096391 | 0.1440972  | -24.74884 |
| 79.33334 | 2.024831 | 0.1531027  | -24.77655 |
| 79.35    | 2.06065  | 0.15761    | -24.80427 |
| 79.36667 | 1.935258 | 0.1260862  | -24.81812 |
| 79.38333 | 1.732092 | 0.1621127  | -24.81812 |
| 79.4     | 2.11416  | 0.1125779  | -24.79041 |
| 79.41666 | 1.899427 | 0.1125734  | -24.76962 |
| 79.43333 | 2.054657 | 0.1350917  | -24.7627  |
| 79.45    | 1.953122 | 0.1350917  | -24.77655 |
| 79.46667 | 2.030723 | 0.1170807  | -24.8112  |
| 79.48333 | 1.977045 | 0.1080706  | -24.80427 |
| 79.5     | 1.923219 | 0.09456238 | -24.77655 |
| 79.51667 | 1.785823 | 0.1260817  | -24.7627  |
| 79.53333 | 1.929104 | 0.09906514 | -24.77655 |
| 79.55    | 1.953075 | 0.1305889  | -24.79041 |
| 79.56667 | 2.000813 | 0.09906514 | -24.79734 |
| 79.58334 | 1.857544 | 0.1711137  | -24.79041 |
| 79.6     | 2.090446 | 0.175621   | -24.7627  |
| 79.61667 | 2.114405 | 0.1441017  | -24.74884 |
| 79.63333 | 2.006967 | 0.1395945  | -24.75577 |
| 79.65    | 1.923237 | 0.1531072  | -24.75577 |
| 79.66666 | 1.976974 | 0.1981348  | -24.74191 |
| 79.68333 | 1.941101 | 0.1080751  | -24.74884 |
| 79.7     | 2.233852 | 0.1395945  | -24.74884 |
| 79.71667 | 1.953242 | 0.1486     | -24.74191 |
| 79.73333 | 1.95311  | 0.1440972  | -24.75577 |
| 79.75    | 1.905295 | 0.0720486  | -24.79041 |
| 79.76667 | 2.156222 | 0.1170762  | -24.80427 |
| 79.78333 | 1.893405 | 0.1350917  | -24.81812 |

|          |          |            |           |
|----------|----------|------------|-----------|
| 79.8     | 2.012769 | 0.1395945  | -24.81812 |
| 79.81667 | 2.120386 | 0.1486     | -24.78348 |
| 79.83334 | 1.965155 | 0.1215834  | -24.74884 |
| 79.85    | 2.144183 | 0.1531027  | -24.74884 |
| 79.86667 | 1.881491 | 0.1035679  | -24.77655 |
| 79.88333 | 1.893345 | 0.1756165  | -24.80427 |
| 79.9     | 2.078497 | 0.1215834  | -24.81812 |
| 79.91666 | 2.048676 | 0.1215834  | -24.81812 |
| 79.93333 | 2.006937 | 0.1170762  | -24.79041 |
| 79.95    | 2.048671 | 0.1395945  | -24.76962 |
| 79.96667 | 2.108454 | 0.1170762  | -24.7627  |
| 79.98333 | 2.006913 | 0.09456238 | -24.77655 |

---
