# Supplementary material for: Radioactive Labeling of Milk-Derived Exosomes with 99mTc and In Vivo Tracking by SPECT Imaging
Source: MDPI journal article supplement (doi:10.3390/nano10061062), 2020-05-30
Supplement: s1 [file s1]

Table S11. Experimental data from Figure 2B. Hydrodynamic size measured using dynamic light scattering:

| Particle size<br>(nm) | 1 NORMALIZED<br>Non-labeled<br>exosomes<br>(intensity, a.u.) | 2 NORMALIZED<br>Non-labeled<br>exosomes<br>(intensity, a.u.) | 3 NORMALIZED<br>Non-labeled<br>exosomes<br>(intensity, a.u.) | 1 NORMALIZED<br>Radiolabeled<br>exosomes<br>(intensity, a.u.) | 2 NORMALIZED<br>Radiolabeled<br>exosomes<br>(intensity, a.u.) | 3 NORMALIZED<br>Radiolabeled<br>exosomes<br>(intensity, a.u.) |
|-----------------------|--------------------------------------------------------------|--------------------------------------------------------------|--------------------------------------------------------------|---------------------------------------------------------------|---------------------------------------------------------------|---------------------------------------------------------------|
| 0.4                   | 0                                                            | 0                                                            | 0                                                            | 0                                                             | 0                                                             | 0                                                             |
| 0.463                 | 0                                                            | 0                                                            | 0                                                            | 0                                                             | 0                                                             | 0                                                             |
| 0.536                 | 0                                                            | 0                                                            | 0                                                            | 0                                                             | 0                                                             | 0                                                             |
| 0.621                 | 0                                                            | 0                                                            | 0                                                            | 0                                                             | 0                                                             | 0                                                             |
| 0.719                 | 0                                                            | 0                                                            | 0                                                            | 0                                                             | 0                                                             | 0                                                             |
| 0.833                 | 0                                                            | 0                                                            | 0                                                            | 0                                                             | 0                                                             | 0                                                             |
| 0.965                 | 0                                                            | 0                                                            | 0                                                            | 0                                                             | 0                                                             | 0                                                             |
| 1.12                  | 0                                                            | 0                                                            | 0                                                            | 0                                                             | 0                                                             | 0                                                             |
| 1.29                  | 0                                                            | 0                                                            | 0                                                            | 0                                                             | 0                                                             | 0                                                             |
| 1.5                   | 0                                                            | 0                                                            | 0                                                            | 0                                                             | 0                                                             | 0                                                             |
| 1.74                  | 0                                                            | 0                                                            | 0                                                            | 0                                                             | 0                                                             | 0                                                             |
| 2.01                  | 0                                                            | 0                                                            | 0                                                            | 0                                                             | 0                                                             | 0                                                             |
| 2.33                  | 0                                                            | 0                                                            | 0                                                            | 0                                                             | 0                                                             | 0                                                             |
| 2.7                   | 0                                                            | 0                                                            | 0                                                            | 0                                                             | 0                                                             | 0                                                             |
| 3.12                  | 0                                                            | 0                                                            | 0                                                            | 0                                                             | 0                                                             | 0                                                             |
| 3.62                  | 0                                                            | 0                                                            | 0                                                            | 0                                                             | 0                                                             | 0                                                             |
| 4.19                  | 0                                                            | 0                                                            | 0                                                            | 0                                                             | 0                                                             | 0                                                             |
| 4.85                  | 0                                                            | 0                                                            | 0                                                            | 0                                                             | 0                                                             | 0                                                             |
| 5.61                  | 0                                                            | 0                                                            | 0                                                            | 0                                                             | 0                                                             | 0                                                             |
| 6.5                   | 0                                                            | 0                                                            | 0                                                            | 0                                                             | 0                                                             | 0                                                             |
| 7.53                  | 0                                                            | 0                                                            | 0                                                            | 0                                                             | 0                                                             | 0                                                             |
| 8.72                  | 0                                                            | 0                                                            | 0                                                            | 0                                                             | 0                                                             | 0                                                             |
| 10.1                  | 0                                                            | 0                                                            | 0                                                            | 0                                                             | 0                                                             | 0                                                             |
| 11.7                  | 0                                                            | 0                                                            | 0                                                            | 0                                                             | 0                                                             | 0                                                             |
| 13.545                | 0                                                            | 0                                                            | 0                                                            | 0                                                             | 0                                                             | 0                                                             |
| 15.686                | 0                                                            | 0                                                            | 0                                                            | 0                                                             | 0                                                             | 0                                                             |
| 18.166                | 0                                                            | 0                                                            | 0                                                            | 0                                                             | 0                                                             | 0                                                             |
| 21.037                | 1.355421687                                                  | 0                                                            | 0                                                            | 0                                                             | 0                                                             | 0.496899225                                                   |
| 24.363                | 2.801204819                                                  | 0                                                            | 0                                                            | 0                                                             | 0                                                             | 0.639534884                                                   |
| 28.214                | 2.876506024                                                  | 0                                                            | 0                                                            | 0                                                             | 0                                                             | 0.124031008                                                   |
| 32.674                | 1.72439759                                                   | 0                                                            | 0                                                            | 0                                                             | 0                                                             | 0.061860465                                                   |
| 37.84                 | 1.129518072                                                  | 1.026869759                                                  | 0                                                            | 2.682926829                                                   | 0                                                             | 2.441860465                                                   |
| 43.821                | 3.576807229                                                  | 7.427691254                                                  | 3.220858896                                                  | 10.48780488                                                   | 4.130434783                                                   | 9.147286822                                                   |
| 50.748                | 11.04668675                                                  | 20.06674653                                                  | 12.01687117                                                  | 23.82113821                                                   | 15.07246377                                                   | 21.00775194                                                   |
| 58.771                | 24.20933735                                                  | 37.4636317                                                   | 26.56441718                                                  | 41.46341463                                                   | 32.46376812                                                   | 37.51937984                                                   |
| 68.061                | 42.03313253                                                  | 56.87147014                                                  | 45.21472393                                                  | 60.81300813                                                   | 53.62318841                                                   | 56.66666667                                                   |
| 78.82                 | 61.9503012                                                   | 75.17542358                                                  | 65.08435583                                                  | 78.7804878                                                    | 74.63768116                                                   | 75.50387597                                                   |
| 91.28                 | 80.50451807                                                  | 89.62861544                                                  | 82.79141104                                                  | 92.68292683                                                   | 91.30434783                                                   | 90.69767442                                                   |
| 105.709               | 94.12650602                                                  | 98.22864967                                                  | 95.18404908                                                  | 100                                                           | 100                                                           | 99.2248062                                                    |
| 122.42                | 100                                                          | 100                                                          | 100                                                          | 99.18699187                                                   | 99.27536232                                                   | 100                                                           |
| 141.772               | 96.72439759                                                  | 95.01112442                                                  | 96.29601227                                                  | 91.8699187                                                    | 89.13043478                                                   | 91.47286822                                                   |
| 164.183               | 84.67620482                                                  | 84.22043471                                                  | 84.66257669                                                  | 77.39837398                                                   | 71.5942029                                                    | 76.20155039                                                   |
| 190.137               | 66.02409639                                                  | 69.30515146                                                  | 67.11656442                                                  | 59.26829268                                                   | 49.85507246                                                   | 56.20155039                                                   |
| 220.194               | 44.36746988                                                  | 52.34468595                                                  | 46.77147239                                                  | 40.08130081                                                   | 28.55072464                                                   | 35.27131783                                                   |

|          |             |             |             |             |             |             |
|----------|-------------|-------------|-------------|-------------|-------------|-------------|
| 255.002  | 23.99096386 | 35.5211364  | 27.2392638  | 22.68292683 | 11.8115942  | 17.28682171 |
| 295.312  | 8.802710843 | 20.81122711 | 11.87883436 | 9.674796748 | 2.384057971 | 5.108527132 |
| 341.995  | 1.09186747  | 9.686804724 | 2.82208589  | 2.268292683 | 0           | 0           |
| 396.058  | 0           | 2.84956358  | 0           | 0           | 0           | 0           |
| 458.666  | 0           | 0.077015232 | 0           | 0           | 0           | 0           |
| 531.172  | 0           | 0           | 0           | 0           | 0           | 0           |
| 615.139  | 0           | 0           | 0           | 0           | 0           | 0           |
| 712.379  | 0           | 0           | 0           | 0           | 0           | 0           |
| 824.992  | 0           | 0           | 0           | 0           | 0           | 0           |
| 955.406  | 0           | 0           | 0           | 0           | 0           | 0           |
| 1106.435 | 0           | 0           | 0           | 0           | 0           | 0           |
| 1281.34  | 0           | 0           | 0           | 0           | 0           | 0           |
| 1483.893 | 0           | 0           | 0           | 0           | 0           | 0           |
| 1718.466 | 0           | 0           | 0           | 0           | 0           | 0           |
| 1990.119 | 0           | 0           | 0           | 0           | 0           | 0           |
| 2304.716 | 0           | 0           | 0           | 0           | 0           | 0           |
| 2669.043 | 0           | 0           | 0           | 0           | 0           | 0           |
| 3090.964 | 0           | 0           | 0           | 0           | 0           | 0           |
| 3579.581 | 0           | 0           | 0           | 0           | 0           | 0           |
| 4145.438 | 0           | 0           | 0           | 0           | 0           | 0           |
| 4800.746 | 0           | 0           | 0           | 0           | 0           | 0           |
| 5559.644 | 0           | 0           | 0           | 0           | 0           | 0           |
| 6438.508 | 0           | 0           | 0           | 0           | 0           | 0           |
| 7456.302 | 0           | 0           | 0           | 0           | 0           | 0           |
| 8634.988 | 0           | 0           | 0           | 0           | 0           | 0           |
| 10000    | 0           | 0           | 0           | 0           | 0           | 0           |
| 824.992  | 0           | 0           | 0           | 0           | 0           | 0           |
| 955.406  | 0           | 0           | 0           | 0           | 0           | 0           |
| 1106.435 | 0           | 0           | 0           | 0           | 0           | 0           |
| 1281.34  | 0           | 0           | 0           | 0           | 0           | 0           |
| 1483.893 | 0           | 0           | 0           | 0           | 0           | 0           |
| 1718.466 | 0           | 0           | 0           | 0           | 0           | 0           |
| 1990.119 | 0           | 0           | 0           | 0           | 0           | 0           |
| 2304.716 | 0           | 0           | 0           | 0           | 0           | 0           |
| 2669.043 | 0           | 0           | 0           | 0           | 0           | 0           |
| 3090.964 | 0           | 0           | 0           | 0           | 0           | 0           |
| 3579.581 | 0           | 0           | 0           | 0           | 0           | 0           |
| 4145.438 | 0           | 0           | 0           | 0           | 0           | 0           |
| 4800.746 | 0           | 0           | 0           | 0           | 0           | 0           |
| 5559.644 | 0           | 0           | 0           | 0           | 0           | 0           |
| 6438.508 | 0           | 0           | 0           | 0           | 0           | 0           |
| 7456.302 | 0           | 0           | 0           | 0           | 0           | 0           |
| 8634.988 | 0           | 0           | 0           | 0           | 0           | 0           |
| 10000    | 0           | 0           | 0           | 0           | 0           | 0           |

---
